# Supplementary material for: Applying the algorithm for Proven and young in GWAS Reveals high polygenicity for key traits in Nellore cattle
Source: Front Genet. 2025 Apr 30;16:1549284. doi: 10.3389/fgene.2025.1549284 (PMC12075139; doi:10.3389/fgene.2025.1549284)
Supplement: Supplementary file 12 [file Table5.xlsx]

## Sheet: Sheet 1
Table S5a. Candidate genes annotated for the top 1% genomic window associated with FS
CHR	BP1	BP2	Range	chr	start_pos	end_pos	width	strand	gene_id	gene_name	gene_biotype
14	25982859	26706002	25982859-26706002	14	25956319	26038333	82015	-	ENSBTAG00000017529	CA8	protein_coding
14	27187105	27959583	27187105-27959583	14	27016060	27203439	187380	-	ENSBTAG00000026283	ASPH	protein_coding
14	25982859	26706002	25982859-26706002	14	26180966	26253265	72300	+	ENSBTAG00000000948	RAB2A	protein_coding
14	25982859	26706002	25982859-26706002	14	26297978	26488619	190642	+	ENSBTAG00000021841	CHD7	protein_coding
14	27187105	27959583	27187105-27959583	14	27464088	27997704	533617	+	ENSBTAG00000054400	NKAIN3	protein_coding
14	25982859	26706002	25982859-26706002	14	26042841	26070030	27190	+	ENSBTAG00000067190		lncRNA
14	25982859	26706002	25982859-26706002	14	26256987	26259397	2411	+	ENSBTAG00000060840		lncRNA
14	25982859	26706002	25982859-26706002	14	26259611	26261492	1882	+	ENSBTAG00000058559		lncRNA
14	25982859	26706002	25982859-26706002	14	26266467	26268327	1861	+	ENSBTAG00000068387		lncRNA
14	25982859	26706002	25982859-26706002	14	26275410	26277214	1805	+	ENSBTAG00000059733		lncRNA
14	25982859	26706002	25982859-26706002	14	26290892	26297780	6889	-	ENSBTAG00000055714		lncRNA
14	25982859	26706002	25982859-26706002	14	26525517	26529053	3537	-	ENSBTAG00000057757		lncRNA
14	25982859	26706002	25982859-26706002	14	26531800	26537086	5287	-	ENSBTAG00000060036		lncRNA
21	50708665	51628186	50708665-51628186	21	51329040	51648271	319232	+	ENSBTAG00000003684	LRFN5	protein_coding
21	50708665	51628186	50708665-51628186	21	51620343	51620482	140	+	ENSBTAG00000043018	U4	snRNA
10	59283823	60764907	59283823-60764907	10	59348641	59360047	11407	+	ENSBTAG00000010472	TNFAIP8L3	protein_coding
10	59283823	60764907	59283823-60764907	10	59890070	59967550	77481	+	ENSBTAG00000022801	GABPB1	protein_coding
10	59283823	60764907	59283823-60764907	10	59917655	59918179	525	-	ENSBTAG00000054552		pseudogene
10	59283823	60764907	59283823-60764907	10	59924476	59924850	375	-	ENSBTAG00000052459		protein_coding
10	59283823	60764907	59283823-60764907	10	59982866	60004776	21911	+	ENSBTAG00000009911	HDC	protein_coding
10	59283823	60764907	59283823-60764907	10	60016132	60070855	54724	-	ENSBTAG00000004303	SLC27A2	protein_coding
10	59283823	60764907	59283823-60764907	10	59392838	59460278	67441	-	ENSBTAG00000013616	AP4E1	protein_coding
10	59283823	60764907	59283823-60764907	10	59425194	59429176	3983	+	ENSBTAG00000062324		protein_coding
10	59283823	60764907	59283823-60764907	10	59459839	59473009	13171	+	ENSBTAG00000055747		protein_coding
10	59283823	60764907	59283823-60764907	10	60084773	60103806	19034	+	ENSBTAG00000059568		protein_coding
10	59283823	60764907	59283823-60764907	10	60090345	60431448	341104	+	ENSBTAG00000011936	ATP8B4	protein_coding
10	59283823	60764907	59283823-60764907	10	60651119	60681591	30473	-	ENSBTAG00000064722		protein_coding
10	59283823	60764907	59283823-60764907	10	60683533	60712326	28794	-	ENSBTAG00000006201	DTWD1	protein_coding
10	59283823	60764907	59283823-60764907	10	60722582	60925175	202594	+	ENSBTAG00000053150	FAM227B	protein_coding
10	59283823	60764907	59283823-60764907	10	59575808	59629196	53389	+	ENSBTAG00000011831	SPPL2A	protein_coding
10	59283823	60764907	59283823-60764907	10	59648276	59757063	108788	+	ENSBTAG00000031165	TRPM7	protein_coding
10	59283823	60764907	59283823-60764907	10	59759248	59796937	37690	+	ENSBTAG00000011929	USP50	protein_coding
10	59283823	60764907	59283823-60764907	10	59797147	59849910	52764	-	ENSBTAG00000011916	USP8	protein_coding
10	59283823	60764907	59283823-60764907	10	59240011	59291206	51196	-	ENSBTAG00000068861		lncRNA
10	59283823	60764907	59283823-60764907	10	60523403	60523494	92	+	ENSBTAG00000046224	U6	snRNA
10	59283823	60764907	59283823-60764907	10	59795060	59795163	104	+	ENSBTAG00000058067	U6	snRNA
20	9802407	10745794	9802407-10745794	20	10017677	10085681	68005	-	ENSBTAG00000000363	BDP1	protein_coding
20	9802407	10745794	9802407-10745794	20	10091597	10095635	4039	+	ENSBTAG00000034360	SERF1A	protein_coding
20	9802407	10745794	9802407-10745794	20	10186474	10221300	34827	-	ENSBTAG00000027983	GTF2H2	protein_coding
20	9802407	10745794	9802407-10745794	20	10378339	10386176	7838	+	ENSBTAG00000057772	TAF9	protein_coding
20	9802407	10745794	9802407-10745794	20	10230183	10276416	46234	-	ENSBTAG00000000561	OCLN	protein_coding
20	9802407	10745794	9802407-10745794	20	10317606	10341066	23461	-	ENSBTAG00000040001	MARVELD2	protein_coding
20	9802407	10745794	9802407-10745794	20	10341517	10375453	33937	-	ENSBTAG00000002073	RAD17	protein_coding
20	61807939	62244291	61807939-62244291	20	61214391	62314255	1099865	+	ENSBTAG00000017222	CTNND2	protein_coding
20	9802407	10745794	9802407-10745794	20	10375638	10389675	14038	+	ENSBTAG00000046192	AK6	protein_coding
20	9802407	10745794	9802407-10745794	20	10396736	10428801	32066	+	ENSBTAG00000017011	CCDC125	protein_coding
20	9802407	10745794	9802407-10745794	20	10432556	10460715	28160	-	ENSBTAG00000011046	CDK7	protein_coding
20	9802407	10745794	9802407-10745794	20	10483054	10502505	19452	-	ENSBTAG00000014246	CENPH	protein_coding
20	9802407	10745794	9802407-10745794	20	10507979	10517702	9724	-	ENSBTAG00000014239	CCNB1	protein_coding
20	9802407	10745794	9802407-10745794	20	10532186	10564828	32643	-	ENSBTAG00000001013	SLC30A5	protein_coding
20	9802407	10745794	9802407-10745794	20	10656382	11417430	761049	+	ENSBTAG00000070003		protein_coding
20	61807939	62244291	61807939-62244291	20	61968355	61968458	104	+	ENSBTAG00000045141	U6	snRNA
20	61807939	62244291	61807939-62244291	20	62222198	62222301	104	+	ENSBTAG00000042090	U6	snRNA
20	9802407	10745794	9802407-10745794	20	10263064	10263122	59	-	ENSBTAG00000048923	bta-mir-7858	miRNA
20	9802407	10745794	9802407-10745794	20	10264043	10264099	57	-	ENSBTAG00000049387	bta-mir-11986b	miRNA
20	9802407	10745794	9802407-10745794	20	10105978	10142562	36585	+	ENSBTAG00000005743	SMN2	protein_coding
20	9802407	10745794	9802407-10745794	20	10146540	10176131	29592	-	ENSBTAG00000003326	NAIP	protein_coding
20	9802407	10745794	9802407-10745794	20	9865315	9867404	2090	-	ENSBTAG00000047486	CARTPT	protein_coding
20	9802407	10745794	9802407-10745794	20	9916220	9993038	76819	-	ENSBTAG00000044160	MCCC2	protein_coding
20	9802407	10745794	9802407-10745794	20	9988474	9989095	622	+	ENSBTAG00000038783		pseudogene
6	32912211	33991326	32912211-33991326	6	33015656	34501208	1485553	-	ENSBTAG00000019808	CCSER1	protein_coding
6	32912211	33991326	32912211-33991326	6	33571441	33573135	1695	+	ENSBTAG00000045523		processed_pseudogene
6	69343468	70257540	69343468-70257540	6	69402213	69463110	60898	-	ENSBTAG00000059729		protein_coding
6	69343468	70257540	69343468-70257540	6	69523594	69596055	72462	-	ENSBTAG00000032660	CHIC2	protein_coding
6	69343468	70257540	69343468-70257540	6	69629306	69631402	2097	+	ENSBTAG00000045812	GSX2	protein_coding
6	69343468	70257540	69343468-70257540	6	69723778	69771549	47772	+	ENSBTAG00000007173	PDGFRA	protein_coding
6	69343468	70257540	69343468-70257540	6	70166692	70254044	87353	+	ENSBTAG00000002699	KIT	protein_coding
6	69343468	70257540	69343468-70257540	6	69692001	69722083	30083	-	ENSBTAG00000058666		lncRNA
6	69343468	70257540	69343468-70257540	6	69877227	69877333	107	-	ENSBTAG00000060229	U6	snRNA
6	69343468	70257540	69343468-70257540	6	69954510	69954616	107	+	ENSBTAG00000057059	U6	snRNA
23	28398875	29002896	28398875-29002896	23	28802214	28813725	11512	-	ENSBTAG00000007532	TRIM15	protein_coding
23	28398875	29002896	28398875-29002896	23	28816455	28825684	9230	+	ENSBTAG00000007530	TRIM10	protein_coding
23	28398875	29002896	28398875-29002896	23	28828093	28841508	13416	-	ENSBTAG00000037381	TRIM40	protein_coding
23	28398875	29002896	28398875-29002896	23	28854091	28880148	26058	+	ENSBTAG00000004490	TRIM31	protein_coding
23	28398875	29002896	28398875-29002896	23	28904539	28909089	4551	+	ENSBTAG00000052499	RNF39	protein_coding
23	28398875	29002896	28398875-29002896	23	28909903	28913349	3447	-	ENSBTAG00000032247	PPP1R11	protein_coding
23	28398875	29002896	28398875-29002896	23	28912658	28917619	4962	+	ENSBTAG00000058345		protein_coding
23	28398875	29002896	28398875-29002896	23	28917109	28920646	3538	-	ENSBTAG00000031792	POLR1H	protein_coding
23	28398875	29002896	28398875-29002896	23	28920606	28926650	6045	+	ENSBTAG00000054588		protein_coding
23	28398875	29002896	28398875-29002896	23	28938683	28943320	4638	+	ENSBTAG00000017836	ZFP57	protein_coding
23	28398875	29002896	28398875-29002896	23	28941968	28953585	11618	-	ENSBTAG00000017818	MOG	protein_coding
23	28398875	29002896	28398875-29002896	23	28974840	29003168	28329	+	ENSBTAG00000017239	GABBR1	protein_coding
23	28398875	29002896	28398875-29002896	23	28394981	28408133	13153	-	ENSBTAG00000006927	ABCF1	protein_coding
23	28398875	29002896	28398875-29002896	23	28450680	28453965	3286	-	ENSBTAG00000050907	RPP21	protein_coding
23	28398875	29002896	28398875-29002896	23	28420981	28428768	7788	+	ENSBTAG00000025516	GNL1	protein_coding
23	28398875	29002896	28398875-29002896	23	28455599	28467526	11928	-	ENSBTAG00000007643	TRIM39	protein_coding
23	28398875	29002896	28398875-29002896	23	28468108	28476740	8633	+	ENSBTAG00000063412		protein_coding
23	28398875	29002896	28398875-29002896	23	28490859	28493960	3102	-	ENSBTAG00000069337		protein_coding
23	28398875	29002896	28398875-29002896	23	28493346	28505609	12264	+	ENSBTAG00000038619		protein_coding
23	28398875	29002896	28398875-29002896	23	28523535	28724601	201067	-	ENSBTAG00000002069		protein_coding
23	28398875	29002896	28398875-29002896	23	28747018	28769136	22119	-	ENSBTAG00000051089		protein_coding
23	28398875	29002896	28398875-29002896	23	28777621	28787323	9703	+	ENSBTAG00000035744	TRIM26	protein_coding
23	28398875	29002896	28398875-29002896	23	28740674	28743657	2984	-	ENSBTAG00000055490		lncRNA
23	28398875	29002896	28398875-29002896	23	28720245	28720305	61	-	ENSBTAG00000054323	bta-mir-11979	miRNA
23	28398875	29002896	28398875-29002896	23	28399539	28399640	102	-	ENSBTAG00000037337	bta-mir-877	miRNA
23	28398875	29002896	28398875-29002896	23	28399166	28399243	78	-	ENSBTAG00000044647	bta-mir-2378	miRNA
23	28398875	29002896	28398875-29002896	23	28415008	28421221	6214	-	ENSBTAG00000006914	PRR3	protein_coding
9	27857764	28620652	27857764-28620652	9	28453559	28470952	17394	-	ENSBTAG00000021587	SMPDL3A	protein_coding
9	27857764	28620652	27857764-28620652	9	28476075	28479847	3773	-	ENSBTAG00000033803	FABP7	protein_coding
9	27857764	28620652	27857764-28620652	9	28522098	28642707	120610	-	ENSBTAG00000004394	PKIB	protein_coding
9	27857764	28620652	27857764-28620652	9	27620644	28113791	493148	+	ENSBTAG00000038849	TRDN	protein_coding
9	13346364	14401787	13346364-14401787	9	13658642	13659405	764	-	ENSBTAG00000054709		protein_coding
9	27857764	28620652	27857764-28620652	9	28261741	28338600	76860	-	ENSBTAG00000021099	CLVS2	protein_coding
9	13346364	14401787	13346364-14401787	9	13812834	13813085	252	+	ENSBTAG00000059318		protein_coding
9	13346364	14401787	13346364-14401787	9	13425540	13425644	105	-	ENSBTAG00000042148	U6	snRNA
9	43583627	44776539	43583627-44776539	9	44576094	44708594	132501	+	ENSBTAG00000016281	PREP	protein_coding
9	43583627	44776539	43583627-44776539	9	43382778	43621548	238771	-	ENSBTAG00000017527	CRYBG1	protein_coding
9	43583627	44776539	43583627-44776539	9	43654967	43807642	152676	+	ENSBTAG00000005400	ATG5	protein_coding
9	43583627	44776539	43583627-44776539	9	43843910	43877120	33211	-	ENSBTAG00000000816	PRDM1	protein_coding
9	43583627	44776539	43583627-44776539	9	44160973	44161541	569	-	ENSBTAG00000018987		protein_coding
9	43583627	44776539	43583627-44776539	9	43820690	43822008	1319	+	ENSBTAG00000066143		lncRNA
9	43583627	44776539	43583627-44776539	9	44039965	44051376	11412	-	ENSBTAG00000056398		lncRNA
9	43583627	44776539	43583627-44776539	9	44048613	44092830	44218	+	ENSBTAG00000057639		lncRNA
9	43583627	44776539	43583627-44776539	9	44713272	44738833	25562	-	ENSBTAG00000060793		lncRNA
3	25432126	26066448	25432126-26066448	3	25583105	25612405	29301	-	ENSBTAG00000055713	TENT5C	protein_coding
3	25432126	26066448	25432126-26066448	3	26012214	26066037	53824	+	ENSBTAG00000062774	VTCN1	protein_coding
3	25432126	26066448	25432126-26066448	3	25671017	25856002	184986	-	ENSBTAG00000003586	MAN1A2	protein_coding
3	25432126	26066448	25432126-26066448	3	25693581	25694213	633	+	ENSBTAG00000063718		protein_coding
3	25432126	26066448	25432126-26066448	3	25867644	25868522	879	+	ENSBTAG00000063598		protein_coding
3	25432126	26066448	25432126-26066448	3	25809411	25810273	863	+	ENSBTAG00000060093		protein_coding
3	25432126	26066448	25432126-26066448	3	25445127	25522446	77320	+	ENSBTAG00000061207		lncRNA
3	25432126	26066448	25432126-26066448	3	25551801	25557049	5249	-	ENSBTAG00000067887		lncRNA
3	25432126	26066448	25432126-26066448	3	25562218	25564665	2448	+	ENSBTAG00000062606		lncRNA
3	25432126	26066448	25432126-26066448	3	25857283	25859207	1925	-	ENSBTAG00000058309		lncRNA
8	32479887	33601105	32479887-33601105	8	33330352	33331072	721	-	ENSBTAG00000055708		protein_coding
8	32479887	33601105	32479887-33601105	8	32379484	32513097	133614	+	ENSBTAG00000067016		lncRNA
8	32479887	33601105	32479887-33601105	8	33092369	33092466	98	+	ENSBTAG00000043919	U6	snRNA
8	32479887	33601105	32479887-33601105	8	33232374	33232513	140	-	ENSBTAG00000028923	U1	snRNA
13	60763905	61948082	60763905-61948082	13	61747783	61787769	39987	+	ENSBTAG00000003215	KIF3B	protein_coding
13	60763905	61948082	60763905-61948082	13	60989366	60990988	1623	-	ENSBTAG00000003364	DEFB119	protein_coding
13	60763905	61948082	60763905-61948082	13	61807037	61870289	63253	+	ENSBTAG00000031402	ASXL1	protein_coding
13	60763905	61948082	60763905-61948082	13	61858234	61859255	1022	-	ENSBTAG00000057476		protein_coding
13	60763905	61948082	60763905-61948082	13	61877708	62005799	128092	-	ENSBTAG00000008348	NOL4L	protein_coding
13	60763905	61948082	60763905-61948082	13	60920397	60925535	5139	-	ENSBTAG00000052478	DEFB116	protein_coding
13	60763905	61948082	60763905-61948082	13	60956432	60959258	2827	+	ENSBTAG00000048009		protein_coding
13	60763905	61948082	60763905-61948082	13	60979378	60979703	326	+	ENSBTAG00000059459		pseudogene
13	60763905	61948082	60763905-61948082	13	61007947	61009276	1330	-	ENSBTAG00000048949	DEFB121	protein_coding
13	60763905	61948082	60763905-61948082	13	61019487	61023677	4191	-	ENSBTAG00000027384	DEFB122A	protein_coding
13	60763905	61948082	60763905-61948082	13	61030366	61034955	4590	-	ENSBTAG00000027383	DEFB122	protein_coding
13	60763905	61948082	60763905-61948082	13	61041160	61051878	10719	+	ENSBTAG00000020555	DEFB123	protein_coding
13	60763905	61948082	60763905-61948082	13	61066902	61070090	3189	-	ENSBTAG00000063404	DEFB124	protein_coding
13	60763905	61948082	60763905-61948082	13	61074110	61083228	9119	+	ENSBTAG00000014176	REM1	protein_coding
13	60763905	61948082	60763905-61948082	13	61097980	61146837	48858	+	ENSBTAG00000008840	HM13	protein_coding
13	60763905	61948082	60763905-61948082	13	61180673	61181831	1159	+	ENSBTAG00000016169	ID1	protein_coding
13	60763905	61948082	60763905-61948082	13	61200127	61205419	5293	+	ENSBTAG00000016171	COX4I2	protein_coding
13	60763905	61948082	60763905-61948082	13	61563071	61578117	15047	-	ENSBTAG00000068396		protein_coding
13	60763905	61948082	60763905-61948082	13	61563147	61608503	45357	+	ENSBTAG00000007932	HCK	protein_coding
13	60763905	61948082	60763905-61948082	13	61622481	61675062	52582	+	ENSBTAG00000001015	TM9SF4	protein_coding
13	60763905	61948082	60763905-61948082	13	61679709	61694193	14485	-	ENSBTAG00000018334	PLAGL2	protein_coding
13	60763905	61948082	60763905-61948082	13	61693390	61733146	39757	+	ENSBTAG00000016231	POFUT1	protein_coding
13	60763905	61948082	60763905-61948082	13	61208342	61215639	7298	-	ENSBTAG00000062868		protein_coding
13	60763905	61948082	60763905-61948082	13	61220111	61270387	50277	-	ENSBTAG00000006526	BCL2L1	protein_coding
13	60763905	61948082	60763905-61948082	13	61227657	61243592	15936	+	ENSBTAG00000060576		protein_coding
13	60763905	61948082	60763905-61948082	13	61285776	61340092	54317	+	ENSBTAG00000018775	TPX2	protein_coding
13	60763905	61948082	60763905-61948082	13	61351514	61369684	18171	+	ENSBTAG00000014930	MYLK2	protein_coding
13	60763905	61948082	60763905-61948082	13	61378348	61386100	7753	-	ENSBTAG00000009206	FOXS1	protein_coding
13	60763905	61948082	60763905-61948082	13	61386193	61392778	6586	-	ENSBTAG00000031214		protein_coding
13	60763905	61948082	60763905-61948082	13	61395187	61405480	10294	-	ENSBTAG00000054678	DUSP15	protein_coding
13	60763905	61948082	60763905-61948082	13	61413129	61463663	50535	+	ENSBTAG00000005937	TTLL9	protein_coding
13	60763905	61948082	60763905-61948082	13	60769544	60822586	53043	+	ENSBTAG00000061598		protein_coding
13	60763905	61948082	60763905-61948082	13	61464644	61471874	7231	-	ENSBTAG00000009743	PDRG1	protein_coding
13	60763905	61948082	60763905-61948082	13	60772937	60775142	2206	-	ENSBTAG00000048288	DEFB129	protein_coding
13	60763905	61948082	60763905-61948082	13	61487256	61511791	24536	+	ENSBTAG00000016348	XKR7	protein_coding
13	60763905	61948082	60763905-61948082	13	61525299	61545663	20365	+	ENSBTAG00000031453	CCM2L	protein_coding
13	60763905	61948082	60763905-61948082	13	60793877	60796412	2536	-	ENSBTAG00000054958	DEFB127	protein_coding
13	60763905	61948082	60763905-61948082	13	60806515	60807473	959	-	ENSBTAG00000051033		protein_coding
13	60763905	61948082	60763905-61948082	13	60828930	60832394	3465	-	ENSBTAG00000053093		protein_coding
13	60763905	61948082	60763905-61948082	13	60849068	60860265	11198	+	ENSBTAG00000049328		protein_coding
13	60763905	61948082	60763905-61948082	13	60873655	60876445	2791	+	ENSBTAG00000049491	DEFB115	protein_coding
13	60763905	61948082	60763905-61948082	13	60894019	60894243	225	-	ENSBTAG00000050556		protein_coding
13	60763905	61948082	60763905-61948082	13	61342776	61346287	3512	+	ENSBTAG00000059407		lncRNA
13	60763905	61948082	60763905-61948082	13	61801219	61806557	5339	-	ENSBTAG00000069578		lncRNA
13	60763905	61948082	60763905-61948082	13	61872935	61876717	3783	+	ENSBTAG00000065081		lncRNA
13	60763905	61948082	60763905-61948082	13	61148250	61157328	9079	+	ENSBTAG00000065637		lncRNA
13	60763905	61948082	60763905-61948082	13	61189377	61199430	10054	-	ENSBTAG00000062643		lncRNA
13	60763905	61948082	60763905-61948082	13	61196547	61199465	2919	+	ENSBTAG00000063697		lncRNA
13	60763905	61948082	60763905-61948082	13	61274346	61285652	11307	-	ENSBTAG00000069793		lncRNA
13	60763905	61948082	60763905-61948082	13	61133471	61133526	56	+	ENSBTAG00000050023	bta-mir-12010	miRNA
2	69283654	71244759	69283654-71244759	2	70609303	70614576	5274	-	ENSBTAG00000021494	EN1	protein_coding
2	69283654	71244759	69283654-71244759	2	70736121	70770454	34334	+	ENSBTAG00000018473	MARCO	protein_coding
2	69283654	71244759	69283654-71244759	2	70918684	70920915	2232	-	ENSBTAG00000003771	C1QL2	protein_coding
2	69283654	71244759	69283654-71244759	2	71009369	71061343	51975	+	ENSBTAG00000007111	STEAP3	protein_coding
2	69283654	71244759	69283654-71244759	2	71101155	71192555	91401	-	ENSBTAG00000010599	C2H2orf76	protein_coding
2	69283654	71244759	69283654-71244759	2	71192388	71197568	5181	+	ENSBTAG00000009517	DBI	protein_coding
2	69283654	71244759	69283654-71244759	2	71236120	71242889	6770	+	ENSBTAG00000026825	TMEM37	protein_coding
2	69283654	71244759	69283654-71244759	2	71244652	71319499	74848	-	ENSBTAG00000013619	SCTR	protein_coding
2	69283654	71244759	69283654-71244759	2	69756859	69800152	43294	+	ENSBTAG00000002112	INSIG2	protein_coding
2	69283654	71244759	69283654-71244759	2	69496303	69512381	16079	+	ENSBTAG00000015077	DDX18	protein_coding
2	69283654	71244759	69283654-71244759	2	69535765	69553996	18232	+	ENSBTAG00000016785		protein_coding
2	69283654	71244759	69283654-71244759	2	69554584	69556079	1496	+	ENSBTAG00000062020		protein_coding
2	69283654	71244759	69283654-71244759	2	69565219	69664403	99185	-	ENSBTAG00000010221	CCDC93	protein_coding
2	69283654	71244759	69283654-71244759	2	70945040	70945417	378	-	ENSBTAG00000020794		protein_coding
2	69283654	71244759	69283654-71244759	2	70054733	70058437	3705	-	ENSBTAG00000059043		lncRNA
2	69283654	71244759	69283654-71244759	2	70087651	70091727	4077	+	ENSBTAG00000065113		lncRNA
2	69283654	71244759	69283654-71244759	2	70121810	70124915	3106	+	ENSBTAG00000060074		lncRNA
2	69283654	71244759	69283654-71244759	2	70615664	70620785	5122	-	ENSBTAG00000057434		lncRNA
2	69283654	71244759	69283654-71244759	2	70621065	70645649	24585	+	ENSBTAG00000066246		lncRNA
2	69283654	71244759	69283654-71244759	2	71003014	71005271	2258	-	ENSBTAG00000070041		lncRNA
2	69283654	71244759	69283654-71244759	2	71092617	71093655	1039	-	ENSBTAG00000068591		lncRNA
2	69283654	71244759	69283654-71244759	2	71229345	71235758	6414	-	ENSBTAG00000060308		lncRNA
2	69283654	71244759	69283654-71244759	2	69492898	69493004	107	-	ENSBTAG00000066244	U6	snRNA
2	105100249	106205451	105100249-106205451	2	105902088	106153970	251883	-	ENSBTAG00000002485	TNS1	protein_coding
2	105100249	106205451	105100249-106205451	2	106154128	106175952	21825	+	ENSBTAG00000003327	RUFY4	protein_coding
2	105100249	106205451	105100249-106205451	2	106185020	106193526	8507	+	ENSBTAG00000038042	CXCR2	protein_coding
2	105100249	106205451	105100249-106205451	2	105111526	105135918	24393	-	ENSBTAG00000069647		lncRNA
2	105100249	106205451	105100249-106205451	2	106011329	106011401	73	-	ENSBTAG00000044630	bta-mir-2356	miRNA
4	103764705	104758316	103764705-104758316	4	103716229	103786978	70750	-	ENSBTAG00000012239	SLC37A3	protein_coding
4	103764705	104758316	103764705-104758316	4	103792919	103806850	13932	+	ENSBTAG00000012261	RAB19	protein_coding
4	103764705	104758316	103764705-104758316	4	103803196	103844566	41371	-	ENSBTAG00000008306	MKRN1	protein_coding
4	103764705	104758316	103764705-104758316	4	103877423	103947944	70522	-	ENSBTAG00000004799	DENND2A	protein_coding
4	103764705	104758316	103764705-104758316	4	103994556	104009670	15115	+	ENSBTAG00000020484	ADCK2	protein_coding
4	103764705	104758316	103764705-104758316	4	104013524	104046618	33095	+	ENSBTAG00000021759	NDUFB2	protein_coding
4	103764705	104758316	103764705-104758316	4	104016900	104194459	177560	-	ENSBTAG00000021761	BRAF	protein_coding
4	103764705	104758316	103764705-104758316	4	104316388	104729340	412953	+	ENSBTAG00000051724	TMEM178B	protein_coding
4	103764705	104758316	103764705-104758316	4	104264742	104273391	8650	-	ENSBTAG00000005285	MRPS33	protein_coding
4	103764705	104758316	103764705-104758316	4	104638115	104638669	555	-	ENSBTAG00000065984		protein_coding
4	103764705	104758316	103764705-104758316	4	103870890	103873614	2725	-	ENSBTAG00000066743		lncRNA
4	103764705	104758316	103764705-104758316	4	103963573	103975347	11775	+	ENSBTAG00000068593		lncRNA
4	103764705	104758316	103764705-104758316	4	104732410	104737066	4657	-	ENSBTAG00000066386		lncRNA
4	103764705	104758316	103764705-104758316	4	104734958	104737020	2063	+	ENSBTAG00000068708		lncRNA
4	103764705	104758316	103764705-104758316	4	104753793	104755513	1721	-	ENSBTAG00000065119		lncRNA
4	103764705	104758316	103764705-104758316	4	103870626	103877159	6534	+	ENSBTAG00000067287		lncRNA
4	103764705	104758316	103764705-104758316	4	103948366	103978054	29689	-	ENSBTAG00000060468		lncRNA
4	103764705	104758316	103764705-104758316	4	103977917	103982688	4772	+	ENSBTAG00000057576		lncRNA
4	103764705	104758316	103764705-104758316	4	104273415	104298832	25418	+	ENSBTAG00000059807		lncRNA
4	103764705	104758316	103764705-104758316	4	104753800	104760844	7045	+	ENSBTAG00000060549		lncRNA
4	103764705	104758316	103764705-104758316	4	104093143	104093261	119	-	ENSBTAG00000068144	5S_rRNA	rRNA
11	79606327	80652125	79606327-80652125	11	80143746	80157733	13988	+	ENSBTAG00000005270	NT5C1B	protein_coding
11	79606327	80652125	79606327-80652125	11	80160589	80165498	4910	+	ENSBTAG00000023928	RDH14	protein_coding
11	79606327	80652125	79606327-80652125	11	80150347	80150453	107	+	ENSBTAG00000059982	U6	snRNA
11	46688746	47677419	46688746-47677419	11	47137533	47137853	321	+	ENSBTAG00000047185		IG_V_gene
11	46688746	47677419	46688746-47677419	11	46857861	46901868	44008	+	ENSBTAG00000019072	PSD4	protein_coding
11	46688746	47677419	46688746-47677419	11	46917078	46981526	64449	-	ENSBTAG00000019354	PAX8	protein_coding
11	46688746	47677419	46688746-47677419	11	47111861	47112930	1070	+	ENSBTAG00000049937		protein_coding
11	46688746	47677419	46688746-47677419	11	47161967	47183006	21040	+	ENSBTAG00000050329		protein_coding
11	46688746	47677419	46688746-47677419	11	47179709	47180392	684	-	ENSBTAG00000047029		protein_coding
11	46688746	47677419	46688746-47677419	11	47200104	47207624	7521	+	ENSBTAG00000051611		protein_coding
11	46688746	47677419	46688746-47677419	11	47218199	47219001	803	+	ENSBTAG00000051342		protein_coding
11	46688746	47677419	46688746-47677419	11	47341507	47342176	670	+	ENSBTAG00000005895		pseudogene
11	46688746	47677419	46688746-47677419	11	47433953	47515738	81786	+	ENSBTAG00000000184	EIF2AK3	protein_coding
11	46688746	47677419	46688746-47677419	11	47540445	47545141	4697	-	ENSBTAG00000009033	SPMIP9	protein_coding
11	46688746	47677419	46688746-47677419	11	47610499	47616083	5585	+	ENSBTAG00000040093	FOXI3	protein_coding
11	46688746	47677419	46688746-47677419	11	47351604	47386164	34561	-	ENSBTAG00000002866	RPIA	protein_coding
11	46688746	47677419	46688746-47677419	11	46700648	46705289	4642	+	ENSBTAG00000060313	IL36A	protein_coding
11	46688746	47677419	46688746-47677419	11	46708894	46717319	8426	+	ENSBTAG00000059479		protein_coding
11	46688746	47677419	46688746-47677419	11	46752345	46756877	4533	+	ENSBTAG00000039839	IL36RN	protein_coding
11	46688746	47677419	46688746-47677419	11	46759723	46771504	11782	+	ENSBTAG00000018012	IL1F10	protein_coding
11	46688746	47677419	46688746-47677419	11	46815530	46837406	21877	+	ENSBTAG00000019665	IL1RN	protein_coding
11	46688746	47677419	46688746-47677419	11	46784007	46804636	20630	+	ENSBTAG00000061807		lncRNA
11	46688746	47677419	46688746-47677419	11	46792957	46813463	20507	-	ENSBTAG00000067476		lncRNA
11	46688746	47677419	46688746-47677419	11	47113558	47130405	16848	+	ENSBTAG00000063203		lncRNA
11	46688746	47677419	46688746-47677419	11	47207666	47216314	8649	+	ENSBTAG00000056718		lncRNA
11	46688746	47677419	46688746-47677419	11	46806877	46815357	8481	+	ENSBTAG00000062700		lncRNA
11	46688746	47677419	46688746-47677419	11	47233479	47305815	72337	+	ENSBTAG00000003408		protein_coding

## Sheet: Sheet1
Table S5b. Functional Analysis of Candidate genes annotated for the top 1% genomic window associated with FS
query	significant	p_value	term_size	query_size	intersection_size	precision	recall	term_id	source	term_name	effective_domain_size	source_order	parents	evidence_codes	intersection	highlighted	gene_name
query_1	TRUE	2.71616e-10	1313	152	40	0.263158	0.0304646	GO:0006955	GO:BP	immune response	18832	2617	GO:0002376, GO:0050896	IEA,IEA,IEA,IMP,IBA IEA,IBA,IBA,IBA,IBA,IBA IEA,IBA IEA,IDA IMP,IBA,IEA,IEA,IEA,IEA,IEA,IEA,IEA,IEA,IEA,IEA,IEA,IEA,IEA,IEA,IEA,IBA,IDA,IBA,IBA,IBA,IBA,IEA,IEA,IMP IBA IEA,IBA IEA,IBA IEA,IBA	ENSBTAG00000011831	TRUE	SPPL2A
query_1	TRUE	2.71616e-10	1313	152	40	0.263158	0.0304646	GO:0006955	GO:BP	immune response	18832	2617	GO:0002376, GO:0050896	IEA,IEA,IEA,IMP,IBA IEA,IBA,IBA,IBA,IBA,IBA IEA,IBA IEA,IDA IMP,IBA,IEA,IEA,IEA,IEA,IEA,IEA,IEA,IEA,IEA,IEA,IEA,IEA,IEA,IEA,IEA,IBA,IDA,IBA,IBA,IBA,IBA,IEA,IEA,IMP IBA IEA,IBA IEA,IBA IEA,IBA	ENSBTAG00000011929	TRUE	USP50
query_1	TRUE	2.71616e-10	1313	152	40	0.263158	0.0304646	GO:0006955	GO:BP	immune response	18832	2617	GO:0002376, GO:0050896	IEA,IEA,IEA,IMP,IBA IEA,IBA,IBA,IBA,IBA,IBA IEA,IBA IEA,IDA IMP,IBA,IEA,IEA,IEA,IEA,IEA,IEA,IEA,IEA,IEA,IEA,IEA,IEA,IEA,IEA,IEA,IBA,IDA,IBA,IBA,IBA,IBA,IEA,IEA,IMP IBA IEA,IBA IEA,IBA IEA,IBA	ENSBTAG00000002699	TRUE	KIT
query_1	TRUE	2.71616e-10	1313	152	40	0.263158	0.0304646	GO:0006955	GO:BP	immune response	18832	2617	GO:0002376, GO:0050896	IEA,IEA,IEA,IMP,IBA IEA,IBA,IBA,IBA,IBA,IBA IEA,IBA IEA,IDA IMP,IBA,IEA,IEA,IEA,IEA,IEA,IEA,IEA,IEA,IEA,IEA,IEA,IEA,IEA,IEA,IEA,IBA,IDA,IBA,IBA,IBA,IBA,IEA,IEA,IMP IBA IEA,IBA IEA,IBA IEA,IBA	ENSBTAG00000007532	TRUE	TRIM15
query_1	TRUE	2.71616e-10	1313	152	40	0.263158	0.0304646	GO:0006955	GO:BP	immune response	18832	2617	GO:0002376, GO:0050896	IEA,IEA,IEA,IMP,IBA IEA,IBA,IBA,IBA,IBA,IBA IEA,IBA IEA,IDA IMP,IBA,IEA,IEA,IEA,IEA,IEA,IEA,IEA,IEA,IEA,IEA,IEA,IEA,IEA,IEA,IEA,IBA,IDA,IBA,IBA,IBA,IBA,IEA,IEA,IMP IBA IEA,IBA IEA,IBA IEA,IBA	ENSBTAG00000007530	TRUE	TRIM10
query_1	TRUE	2.71616e-10	1313	152	40	0.263158	0.0304646	GO:0006955	GO:BP	immune response	18832	2617	GO:0002376, GO:0050896	IEA,IEA,IEA,IMP,IBA IEA,IBA,IBA,IBA,IBA,IBA IEA,IBA IEA,IDA IMP,IBA,IEA,IEA,IEA,IEA,IEA,IEA,IEA,IEA,IEA,IEA,IEA,IEA,IEA,IEA,IEA,IBA,IDA,IBA,IBA,IBA,IBA,IEA,IEA,IMP IBA IEA,IBA IEA,IBA IEA,IBA	ENSBTAG00000037381	TRUE	TRIM40
query_1	TRUE	2.71616e-10	1313	152	40	0.263158	0.0304646	GO:0006955	GO:BP	immune response	18832	2617	GO:0002376, GO:0050896	IEA,IEA,IEA,IMP,IBA IEA,IBA,IBA,IBA,IBA,IBA IEA,IBA IEA,IDA IMP,IBA,IEA,IEA,IEA,IEA,IEA,IEA,IEA,IEA,IEA,IEA,IEA,IEA,IEA,IEA,IEA,IBA,IDA,IBA,IBA,IBA,IBA,IEA,IEA,IMP IBA IEA,IBA IEA,IBA IEA,IBA	ENSBTAG00000004490	TRUE	TRIM31
query_1	TRUE	2.71616e-10	1313	152	40	0.263158	0.0304646	GO:0006955	GO:BP	immune response	18832	2617	GO:0002376, GO:0050896	IEA,IEA,IEA,IMP,IBA IEA,IBA,IBA,IBA,IBA,IBA IEA,IBA IEA,IDA IMP,IBA,IEA,IEA,IEA,IEA,IEA,IEA,IEA,IEA,IEA,IEA,IEA,IEA,IEA,IEA,IEA,IBA,IDA,IBA,IBA,IBA,IBA,IEA,IEA,IMP IBA IEA,IBA IEA,IBA IEA,IBA	ENSBTAG00000017818	TRUE	MOG
query_1	TRUE	2.71616e-10	1313	152	40	0.263158	0.0304646	GO:0006955	GO:BP	immune response	18832	2617	GO:0002376, GO:0050896	IEA,IEA,IEA,IMP,IBA IEA,IBA,IBA,IBA,IBA,IBA IEA,IBA IEA,IDA IMP,IBA,IEA,IEA,IEA,IEA,IEA,IEA,IEA,IEA,IEA,IEA,IEA,IEA,IEA,IEA,IEA,IBA,IDA,IBA,IBA,IBA,IBA,IEA,IEA,IMP IBA IEA,IBA IEA,IBA IEA,IBA	ENSBTAG00000038619	TRUE
query_1	TRUE	2.71616e-10	1313	152	40	0.263158	0.0304646	GO:0006955	GO:BP	immune response	18832	2617	GO:0002376, GO:0050896	IEA,IEA,IEA,IMP,IBA IEA,IBA,IBA,IBA,IBA,IBA IEA,IBA IEA,IDA IMP,IBA,IEA,IEA,IEA,IEA,IEA,IEA,IEA,IEA,IEA,IEA,IEA,IEA,IEA,IEA,IEA,IBA,IDA,IBA,IBA,IBA,IBA,IEA,IEA,IMP IBA IEA,IBA IEA,IBA IEA,IBA	ENSBTAG00000002069	TRUE
query_1	TRUE	2.71616e-10	1313	152	40	0.263158	0.0304646	GO:0006955	GO:BP	immune response	18832	2617	GO:0002376, GO:0050896	IEA,IEA,IEA,IMP,IBA IEA,IBA,IBA,IBA,IBA,IBA IEA,IBA IEA,IDA IMP,IBA,IEA,IEA,IEA,IEA,IEA,IEA,IEA,IEA,IEA,IEA,IEA,IEA,IEA,IEA,IEA,IBA,IDA,IBA,IBA,IBA,IBA,IEA,IEA,IMP IBA IEA,IBA IEA,IBA IEA,IBA	ENSBTAG00000035744	TRUE	TRIM26
query_1	TRUE	2.71616e-10	1313	152	40	0.263158	0.0304646	GO:0006955	GO:BP	immune response	18832	2617	GO:0002376, GO:0050896	IEA,IEA,IEA,IMP,IBA IEA,IBA,IBA,IBA,IBA,IBA IEA,IBA IEA,IDA IMP,IBA,IEA,IEA,IEA,IEA,IEA,IEA,IEA,IEA,IEA,IEA,IEA,IEA,IEA,IEA,IEA,IBA,IDA,IBA,IBA,IBA,IBA,IEA,IEA,IMP IBA IEA,IBA IEA,IBA IEA,IBA	ENSBTAG00000005400	TRUE	ATG5
query_1	TRUE	2.71616e-10	1313	152	40	0.263158	0.0304646	GO:0006955	GO:BP	immune response	18832	2617	GO:0002376, GO:0050896	IEA,IEA,IEA,IMP,IBA IEA,IBA,IBA,IBA,IBA,IBA IEA,IBA IEA,IDA IMP,IBA,IEA,IEA,IEA,IEA,IEA,IEA,IEA,IEA,IEA,IEA,IEA,IEA,IEA,IEA,IEA,IBA,IDA,IBA,IBA,IBA,IBA,IEA,IEA,IMP IBA IEA,IBA IEA,IBA IEA,IBA	ENSBTAG00000062774	TRUE	VTCN1
query_1	TRUE	2.71616e-10	1313	152	40	0.263158	0.0304646	GO:0006955	GO:BP	immune response	18832	2617	GO:0002376, GO:0050896	IEA,IEA,IEA,IMP,IBA IEA,IBA,IBA,IBA,IBA,IBA IEA,IBA IEA,IDA IMP,IBA,IEA,IEA,IEA,IEA,IEA,IEA,IEA,IEA,IEA,IEA,IEA,IEA,IEA,IEA,IEA,IBA,IDA,IBA,IBA,IBA,IBA,IEA,IEA,IMP IBA IEA,IBA IEA,IBA IEA,IBA	ENSBTAG00000003364	TRUE	DEFB119
query_1	TRUE	2.71616e-10	1313	152	40	0.263158	0.0304646	GO:0006955	GO:BP	immune response	18832	2617	GO:0002376, GO:0050896	IEA,IEA,IEA,IMP,IBA IEA,IBA,IBA,IBA,IBA,IBA IEA,IBA IEA,IDA IMP,IBA,IEA,IEA,IEA,IEA,IEA,IEA,IEA,IEA,IEA,IEA,IEA,IEA,IEA,IEA,IEA,IBA,IDA,IBA,IBA,IBA,IBA,IEA,IEA,IMP IBA IEA,IBA IEA,IBA IEA,IBA	ENSBTAG00000052478	TRUE	DEFB116
query_1	TRUE	2.71616e-10	1313	152	40	0.263158	0.0304646	GO:0006955	GO:BP	immune response	18832	2617	GO:0002376, GO:0050896	IEA,IEA,IEA,IMP,IBA IEA,IBA,IBA,IBA,IBA,IBA IEA,IBA IEA,IDA IMP,IBA,IEA,IEA,IEA,IEA,IEA,IEA,IEA,IEA,IEA,IEA,IEA,IEA,IEA,IEA,IEA,IBA,IDA,IBA,IBA,IBA,IBA,IEA,IEA,IMP IBA IEA,IBA IEA,IBA IEA,IBA	ENSBTAG00000048009	TRUE
query_1	TRUE	2.71616e-10	1313	152	40	0.263158	0.0304646	GO:0006955	GO:BP	immune response	18832	2617	GO:0002376, GO:0050896	IEA,IEA,IEA,IMP,IBA IEA,IBA,IBA,IBA,IBA,IBA IEA,IBA IEA,IDA IMP,IBA,IEA,IEA,IEA,IEA,IEA,IEA,IEA,IEA,IEA,IEA,IEA,IEA,IEA,IEA,IEA,IBA,IDA,IBA,IBA,IBA,IBA,IEA,IEA,IMP IBA IEA,IBA IEA,IBA IEA,IBA	ENSBTAG00000048949	TRUE	DEFB121
query_1	TRUE	2.71616e-10	1313	152	40	0.263158	0.0304646	GO:0006955	GO:BP	immune response	18832	2617	GO:0002376, GO:0050896	IEA,IEA,IEA,IMP,IBA IEA,IBA,IBA,IBA,IBA,IBA IEA,IBA IEA,IDA IMP,IBA,IEA,IEA,IEA,IEA,IEA,IEA,IEA,IEA,IEA,IEA,IEA,IEA,IEA,IEA,IEA,IBA,IDA,IBA,IBA,IBA,IBA,IEA,IEA,IMP IBA IEA,IBA IEA,IBA IEA,IBA	ENSBTAG00000027384	TRUE	DEFB122A
query_1	TRUE	2.71616e-10	1313	152	40	0.263158	0.0304646	GO:0006955	GO:BP	immune response	18832	2617	GO:0002376, GO:0050896	IEA,IEA,IEA,IMP,IBA IEA,IBA,IBA,IBA,IBA,IBA IEA,IBA IEA,IDA IMP,IBA,IEA,IEA,IEA,IEA,IEA,IEA,IEA,IEA,IEA,IEA,IEA,IEA,IEA,IEA,IEA,IBA,IDA,IBA,IBA,IBA,IBA,IEA,IEA,IMP IBA IEA,IBA IEA,IBA IEA,IBA	ENSBTAG00000027383	TRUE	DEFB122
query_1	TRUE	2.71616e-10	1313	152	40	0.263158	0.0304646	GO:0006955	GO:BP	immune response	18832	2617	GO:0002376, GO:0050896	IEA,IEA,IEA,IMP,IBA IEA,IBA,IBA,IBA,IBA,IBA IEA,IBA IEA,IDA IMP,IBA,IEA,IEA,IEA,IEA,IEA,IEA,IEA,IEA,IEA,IEA,IEA,IEA,IEA,IEA,IEA,IBA,IDA,IBA,IBA,IBA,IBA,IEA,IEA,IMP IBA IEA,IBA IEA,IBA IEA,IBA	ENSBTAG00000020555	TRUE	DEFB123
query_1	TRUE	2.71616e-10	1313	152	40	0.263158	0.0304646	GO:0006955	GO:BP	immune response	18832	2617	GO:0002376, GO:0050896	IEA,IEA,IEA,IMP,IBA IEA,IBA,IBA,IBA,IBA,IBA IEA,IBA IEA,IDA IMP,IBA,IEA,IEA,IEA,IEA,IEA,IEA,IEA,IEA,IEA,IEA,IEA,IEA,IEA,IEA,IEA,IBA,IDA,IBA,IBA,IBA,IBA,IEA,IEA,IMP IBA IEA,IBA IEA,IBA IEA,IBA	ENSBTAG00000063404	TRUE	DEFB124
query_1	TRUE	2.71616e-10	1313	152	40	0.263158	0.0304646	GO:0006955	GO:BP	immune response	18832	2617	GO:0002376, GO:0050896	IEA,IEA,IEA,IMP,IBA IEA,IBA,IBA,IBA,IBA,IBA IEA,IBA IEA,IDA IMP,IBA,IEA,IEA,IEA,IEA,IEA,IEA,IEA,IEA,IEA,IEA,IEA,IEA,IEA,IEA,IEA,IBA,IDA,IBA,IBA,IBA,IBA,IEA,IEA,IMP IBA IEA,IBA IEA,IBA IEA,IBA	ENSBTAG00000007932	TRUE	HCK
query_1	TRUE	2.71616e-10	1313	152	40	0.263158	0.0304646	GO:0006955	GO:BP	immune response	18832	2617	GO:0002376, GO:0050896	IEA,IEA,IEA,IMP,IBA IEA,IBA,IBA,IBA,IBA,IBA IEA,IBA IEA,IDA IMP,IBA,IEA,IEA,IEA,IEA,IEA,IEA,IEA,IEA,IEA,IEA,IEA,IEA,IEA,IEA,IEA,IBA,IDA,IBA,IBA,IBA,IBA,IEA,IEA,IMP IBA IEA,IBA IEA,IBA IEA,IBA	ENSBTAG00000054958	TRUE	DEFB127
query_1	TRUE	2.71616e-10	1313	152	40	0.263158	0.0304646	GO:0006955	GO:BP	immune response	18832	2617	GO:0002376, GO:0050896	IEA,IEA,IEA,IMP,IBA IEA,IBA,IBA,IBA,IBA,IBA IEA,IBA IEA,IDA IMP,IBA,IEA,IEA,IEA,IEA,IEA,IEA,IEA,IEA,IEA,IEA,IEA,IEA,IEA,IEA,IEA,IBA,IDA,IBA,IBA,IBA,IBA,IEA,IEA,IMP IBA IEA,IBA IEA,IBA IEA,IBA	ENSBTAG00000051033	TRUE
query_1	TRUE	2.71616e-10	1313	152	40	0.263158	0.0304646	GO:0006955	GO:BP	immune response	18832	2617	GO:0002376, GO:0050896	IEA,IEA,IEA,IMP,IBA IEA,IBA,IBA,IBA,IBA,IBA IEA,IBA IEA,IDA IMP,IBA,IEA,IEA,IEA,IEA,IEA,IEA,IEA,IEA,IEA,IEA,IEA,IEA,IEA,IEA,IEA,IBA,IDA,IBA,IBA,IBA,IBA,IEA,IEA,IMP IBA IEA,IBA IEA,IBA IEA,IBA	ENSBTAG00000053093	TRUE
query_1	TRUE	2.71616e-10	1313	152	40	0.263158	0.0304646	GO:0006955	GO:BP	immune response	18832	2617	GO:0002376, GO:0050896	IEA,IEA,IEA,IMP,IBA IEA,IBA,IBA,IBA,IBA,IBA IEA,IBA IEA,IDA IMP,IBA,IEA,IEA,IEA,IEA,IEA,IEA,IEA,IEA,IEA,IEA,IEA,IEA,IEA,IEA,IEA,IBA,IDA,IBA,IBA,IBA,IBA,IEA,IEA,IMP IBA IEA,IBA IEA,IBA IEA,IBA	ENSBTAG00000049328	TRUE
query_1	TRUE	2.71616e-10	1313	152	40	0.263158	0.0304646	GO:0006955	GO:BP	immune response	18832	2617	GO:0002376, GO:0050896	IEA,IEA,IEA,IMP,IBA IEA,IBA,IBA,IBA,IBA,IBA IEA,IBA IEA,IDA IMP,IBA,IEA,IEA,IEA,IEA,IEA,IEA,IEA,IEA,IEA,IEA,IEA,IEA,IEA,IEA,IEA,IBA,IDA,IBA,IBA,IBA,IBA,IEA,IEA,IMP IBA IEA,IBA IEA,IBA IEA,IBA	ENSBTAG00000049491	TRUE	DEFB115
query_1	TRUE	2.71616e-10	1313	152	40	0.263158	0.0304646	GO:0006955	GO:BP	immune response	18832	2617	GO:0002376, GO:0050896	IEA,IEA,IEA,IMP,IBA IEA,IBA,IBA,IBA,IBA,IBA IEA,IBA IEA,IDA IMP,IBA,IEA,IEA,IEA,IEA,IEA,IEA,IEA,IEA,IEA,IEA,IEA,IEA,IEA,IEA,IEA,IBA,IDA,IBA,IBA,IBA,IBA,IEA,IEA,IMP IBA IEA,IBA IEA,IBA IEA,IBA	ENSBTAG00000050556	TRUE
query_1	TRUE	2.71616e-10	1313	152	40	0.263158	0.0304646	GO:0006955	GO:BP	immune response	18832	2617	GO:0002376, GO:0050896	IEA,IEA,IEA,IMP,IBA IEA,IBA,IBA,IBA,IBA,IBA IEA,IBA IEA,IDA IMP,IBA,IEA,IEA,IEA,IEA,IEA,IEA,IEA,IEA,IEA,IEA,IEA,IEA,IEA,IEA,IEA,IBA,IDA,IBA,IBA,IBA,IBA,IEA,IEA,IMP IBA IEA,IBA IEA,IBA IEA,IBA	ENSBTAG00000038042	TRUE	CXCR2
query_1	TRUE	2.71616e-10	1313	152	40	0.263158	0.0304646	GO:0006955	GO:BP	immune response	18832	2617	GO:0002376, GO:0050896	IEA,IEA,IEA,IMP,IBA IEA,IBA,IBA,IBA,IBA,IBA IEA,IBA IEA,IDA IMP,IBA,IEA,IEA,IEA,IEA,IEA,IEA,IEA,IEA,IEA,IEA,IEA,IEA,IEA,IEA,IEA,IBA,IDA,IBA,IBA,IBA,IBA,IEA,IEA,IMP IBA IEA,IBA IEA,IBA IEA,IBA	ENSBTAG00000021761	TRUE	BRAF
query_1	TRUE	2.71616e-10	1313	152	40	0.263158	0.0304646	GO:0006955	GO:BP	immune response	18832	2617	GO:0002376, GO:0050896	IEA,IEA,IEA,IMP,IBA IEA,IBA,IBA,IBA,IBA,IBA IEA,IBA IEA,IDA IMP,IBA,IEA,IEA,IEA,IEA,IEA,IEA,IEA,IEA,IEA,IEA,IEA,IEA,IEA,IEA,IEA,IBA,IDA,IBA,IBA,IBA,IBA,IEA,IEA,IMP IBA IEA,IBA IEA,IBA IEA,IBA	ENSBTAG00000047185	TRUE
query_1	TRUE	2.71616e-10	1313	152	40	0.263158	0.0304646	GO:0006955	GO:BP	immune response	18832	2617	GO:0002376, GO:0050896	IEA,IEA,IEA,IMP,IBA IEA,IBA,IBA,IBA,IBA,IBA IEA,IBA IEA,IDA IMP,IBA,IEA,IEA,IEA,IEA,IEA,IEA,IEA,IEA,IEA,IEA,IEA,IEA,IEA,IEA,IEA,IBA,IDA,IBA,IBA,IBA,IBA,IEA,IEA,IMP IBA IEA,IBA IEA,IBA IEA,IBA	ENSBTAG00000050329	TRUE
query_1	TRUE	2.71616e-10	1313	152	40	0.263158	0.0304646	GO:0006955	GO:BP	immune response	18832	2617	GO:0002376, GO:0050896	IEA,IEA,IEA,IMP,IBA IEA,IBA,IBA,IBA,IBA,IBA IEA,IBA IEA,IDA IMP,IBA,IEA,IEA,IEA,IEA,IEA,IEA,IEA,IEA,IEA,IEA,IEA,IEA,IEA,IEA,IEA,IBA,IDA,IBA,IBA,IBA,IBA,IEA,IEA,IMP IBA IEA,IBA IEA,IBA IEA,IBA	ENSBTAG00000051611	TRUE
query_1	TRUE	2.71616e-10	1313	152	40	0.263158	0.0304646	GO:0006955	GO:BP	immune response	18832	2617	GO:0002376, GO:0050896	IEA,IEA,IEA,IMP,IBA IEA,IBA,IBA,IBA,IBA,IBA IEA,IBA IEA,IDA IMP,IBA,IEA,IEA,IEA,IEA,IEA,IEA,IEA,IEA,IEA,IEA,IEA,IEA,IEA,IEA,IEA,IBA,IDA,IBA,IBA,IBA,IBA,IEA,IEA,IMP IBA IEA,IBA IEA,IBA IEA,IBA	ENSBTAG00000051342	TRUE
query_1	TRUE	2.71616e-10	1313	152	40	0.263158	0.0304646	GO:0006955	GO:BP	immune response	18832	2617	GO:0002376, GO:0050896	IEA,IEA,IEA,IMP,IBA IEA,IBA,IBA,IBA,IBA,IBA IEA,IBA IEA,IDA IMP,IBA,IEA,IEA,IEA,IEA,IEA,IEA,IEA,IEA,IEA,IEA,IEA,IEA,IEA,IEA,IEA,IBA,IDA,IBA,IBA,IBA,IBA,IEA,IEA,IMP IBA IEA,IBA IEA,IBA IEA,IBA	ENSBTAG00000060313	TRUE	IL36A
query_1	TRUE	2.71616e-10	1313	152	40	0.263158	0.0304646	GO:0006955	GO:BP	immune response	18832	2617	GO:0002376, GO:0050896	IEA,IEA,IEA,IMP,IBA IEA,IBA,IBA,IBA,IBA,IBA IEA,IBA IEA,IDA IMP,IBA,IEA,IEA,IEA,IEA,IEA,IEA,IEA,IEA,IEA,IEA,IEA,IEA,IEA,IEA,IEA,IBA,IDA,IBA,IBA,IBA,IBA,IEA,IEA,IMP IBA IEA,IBA IEA,IBA IEA,IBA	ENSBTAG00000059479	TRUE
query_1	TRUE	2.71616e-10	1313	152	40	0.263158	0.0304646	GO:0006955	GO:BP	immune response	18832	2617	GO:0002376, GO:0050896	IEA,IEA,IEA,IMP,IBA IEA,IBA,IBA,IBA,IBA,IBA IEA,IBA IEA,IDA IMP,IBA,IEA,IEA,IEA,IEA,IEA,IEA,IEA,IEA,IEA,IEA,IEA,IEA,IEA,IEA,IEA,IBA,IDA,IBA,IBA,IBA,IBA,IEA,IEA,IMP IBA IEA,IBA IEA,IBA IEA,IBA	ENSBTAG00000039839	TRUE	IL36RN
query_1	TRUE	2.71616e-10	1313	152	40	0.263158	0.0304646	GO:0006955	GO:BP	immune response	18832	2617	GO:0002376, GO:0050896	IEA,IEA,IEA,IMP,IBA IEA,IBA,IBA,IBA,IBA,IBA IEA,IBA IEA,IDA IMP,IBA,IEA,IEA,IEA,IEA,IEA,IEA,IEA,IEA,IEA,IEA,IEA,IEA,IEA,IEA,IEA,IBA,IDA,IBA,IBA,IBA,IBA,IEA,IEA,IMP IBA IEA,IBA IEA,IBA IEA,IBA	ENSBTAG00000018012	TRUE	IL1F10
query_1	TRUE	2.71616e-10	1313	152	40	0.263158	0.0304646	GO:0006955	GO:BP	immune response	18832	2617	GO:0002376, GO:0050896	IEA,IEA,IEA,IMP,IBA IEA,IBA,IBA,IBA,IBA,IBA IEA,IBA IEA,IDA IMP,IBA,IEA,IEA,IEA,IEA,IEA,IEA,IEA,IEA,IEA,IEA,IEA,IEA,IEA,IEA,IEA,IBA,IDA,IBA,IBA,IBA,IBA,IEA,IEA,IMP IBA IEA,IBA IEA,IBA IEA,IBA	ENSBTAG00000019665	TRUE	IL1RN
query_1	TRUE	2.71616e-10	1313	152	40	0.263158	0.0304646	GO:0006955	GO:BP	immune response	18832	2617	GO:0002376, GO:0050896	IEA,IEA,IEA,IMP,IBA IEA,IBA,IBA,IBA,IBA,IBA IEA,IBA IEA,IDA IMP,IBA,IEA,IEA,IEA,IEA,IEA,IEA,IEA,IEA,IEA,IEA,IEA,IEA,IEA,IEA,IEA,IBA,IDA,IBA,IBA,IBA,IBA,IEA,IEA,IMP IBA IEA,IBA IEA,IBA IEA,IBA	ENSBTAG00000003408	TRUE
query_1	TRUE	6.79597e-07	1960	152	43	0.282895	0.0219388	GO:0002376	GO:BP	immune system process	18832	913	GO:0008150	IEA,IEA,IEA,IBA IEA,IMP,IBA IEA,IBA,IBA,IBA,IBA,IBA IEA,IBA IEA,IDA IMP IEA,IMP,IBA IEA,IEA,IEA,IEA,IEA,IEA,IEA,IEA,IEA,IBA IEA,IEA,IEA,IEA,IEA,IEA,IEA,IEA,IBA,IDA IMP IGI,IBA,IBA,IBA,IBA,IEA,IEA,IMP IBA IEA,IBA IEA,IBA IEA,IBA	ENSBTAG00000021841	FALSE	CHD7
query_1	TRUE	6.79597e-07	1960	152	43	0.282895	0.0219388	GO:0002376	GO:BP	immune system process	18832	913	GO:0008150	IEA,IEA,IEA,IBA IEA,IMP,IBA IEA,IBA,IBA,IBA,IBA,IBA IEA,IBA IEA,IDA IMP IEA,IMP,IBA IEA,IEA,IEA,IEA,IEA,IEA,IEA,IEA,IEA,IBA IEA,IEA,IEA,IEA,IEA,IEA,IEA,IEA,IBA,IDA IMP IGI,IBA,IBA,IBA,IBA,IEA,IEA,IMP IBA IEA,IBA IEA,IBA IEA,IBA	ENSBTAG00000011831	FALSE	SPPL2A
query_1	TRUE	6.79597e-07	1960	152	43	0.282895	0.0219388	GO:0002376	GO:BP	immune system process	18832	913	GO:0008150	IEA,IEA,IEA,IBA IEA,IMP,IBA IEA,IBA,IBA,IBA,IBA,IBA IEA,IBA IEA,IDA IMP IEA,IMP,IBA IEA,IEA,IEA,IEA,IEA,IEA,IEA,IEA,IEA,IBA IEA,IEA,IEA,IEA,IEA,IEA,IEA,IEA,IBA,IDA IMP IGI,IBA,IBA,IBA,IBA,IEA,IEA,IMP IBA IEA,IBA IEA,IBA IEA,IBA	ENSBTAG00000011929	FALSE	USP50
query_1	TRUE	6.79597e-07	1960	152	43	0.282895	0.0219388	GO:0002376	GO:BP	immune system process	18832	913	GO:0008150	IEA,IEA,IEA,IBA IEA,IMP,IBA IEA,IBA,IBA,IBA,IBA,IBA IEA,IBA IEA,IDA IMP IEA,IMP,IBA IEA,IEA,IEA,IEA,IEA,IEA,IEA,IEA,IEA,IBA IEA,IEA,IEA,IEA,IEA,IEA,IEA,IEA,IBA,IDA IMP IGI,IBA,IBA,IBA,IBA,IEA,IEA,IMP IBA IEA,IBA IEA,IBA IEA,IBA	ENSBTAG00000002699	FALSE	KIT
query_1	TRUE	6.79597e-07	1960	152	43	0.282895	0.0219388	GO:0002376	GO:BP	immune system process	18832	913	GO:0008150	IEA,IEA,IEA,IBA IEA,IMP,IBA IEA,IBA,IBA,IBA,IBA,IBA IEA,IBA IEA,IDA IMP IEA,IMP,IBA IEA,IEA,IEA,IEA,IEA,IEA,IEA,IEA,IEA,IBA IEA,IEA,IEA,IEA,IEA,IEA,IEA,IEA,IBA,IDA IMP IGI,IBA,IBA,IBA,IBA,IEA,IEA,IMP IBA IEA,IBA IEA,IBA IEA,IBA	ENSBTAG00000007532	FALSE	TRIM15
query_1	TRUE	6.79597e-07	1960	152	43	0.282895	0.0219388	GO:0002376	GO:BP	immune system process	18832	913	GO:0008150	IEA,IEA,IEA,IBA IEA,IMP,IBA IEA,IBA,IBA,IBA,IBA,IBA IEA,IBA IEA,IDA IMP IEA,IMP,IBA IEA,IEA,IEA,IEA,IEA,IEA,IEA,IEA,IEA,IBA IEA,IEA,IEA,IEA,IEA,IEA,IEA,IEA,IBA,IDA IMP IGI,IBA,IBA,IBA,IBA,IEA,IEA,IMP IBA IEA,IBA IEA,IBA IEA,IBA	ENSBTAG00000007530	FALSE	TRIM10
query_1	TRUE	6.79597e-07	1960	152	43	0.282895	0.0219388	GO:0002376	GO:BP	immune system process	18832	913	GO:0008150	IEA,IEA,IEA,IBA IEA,IMP,IBA IEA,IBA,IBA,IBA,IBA,IBA IEA,IBA IEA,IDA IMP IEA,IMP,IBA IEA,IEA,IEA,IEA,IEA,IEA,IEA,IEA,IEA,IBA IEA,IEA,IEA,IEA,IEA,IEA,IEA,IEA,IBA,IDA IMP IGI,IBA,IBA,IBA,IBA,IEA,IEA,IMP IBA IEA,IBA IEA,IBA IEA,IBA	ENSBTAG00000037381	FALSE	TRIM40
query_1	TRUE	6.79597e-07	1960	152	43	0.282895	0.0219388	GO:0002376	GO:BP	immune system process	18832	913	GO:0008150	IEA,IEA,IEA,IBA IEA,IMP,IBA IEA,IBA,IBA,IBA,IBA,IBA IEA,IBA IEA,IDA IMP IEA,IMP,IBA IEA,IEA,IEA,IEA,IEA,IEA,IEA,IEA,IEA,IBA IEA,IEA,IEA,IEA,IEA,IEA,IEA,IEA,IBA,IDA IMP IGI,IBA,IBA,IBA,IBA,IEA,IEA,IMP IBA IEA,IBA IEA,IBA IEA,IBA	ENSBTAG00000004490	FALSE	TRIM31
query_1	TRUE	6.79597e-07	1960	152	43	0.282895	0.0219388	GO:0002376	GO:BP	immune system process	18832	913	GO:0008150	IEA,IEA,IEA,IBA IEA,IMP,IBA IEA,IBA,IBA,IBA,IBA,IBA IEA,IBA IEA,IDA IMP IEA,IMP,IBA IEA,IEA,IEA,IEA,IEA,IEA,IEA,IEA,IEA,IBA IEA,IEA,IEA,IEA,IEA,IEA,IEA,IEA,IBA,IDA IMP IGI,IBA,IBA,IBA,IBA,IEA,IEA,IMP IBA IEA,IBA IEA,IBA IEA,IBA	ENSBTAG00000017818	FALSE	MOG
query_1	TRUE	6.79597e-07	1960	152	43	0.282895	0.0219388	GO:0002376	GO:BP	immune system process	18832	913	GO:0008150	IEA,IEA,IEA,IBA IEA,IMP,IBA IEA,IBA,IBA,IBA,IBA,IBA IEA,IBA IEA,IDA IMP IEA,IMP,IBA IEA,IEA,IEA,IEA,IEA,IEA,IEA,IEA,IEA,IBA IEA,IEA,IEA,IEA,IEA,IEA,IEA,IEA,IBA,IDA IMP IGI,IBA,IBA,IBA,IBA,IEA,IEA,IMP IBA IEA,IBA IEA,IBA IEA,IBA	ENSBTAG00000038619	FALSE
query_1	TRUE	6.79597e-07	1960	152	43	0.282895	0.0219388	GO:0002376	GO:BP	immune system process	18832	913	GO:0008150	IEA,IEA,IEA,IBA IEA,IMP,IBA IEA,IBA,IBA,IBA,IBA,IBA IEA,IBA IEA,IDA IMP IEA,IMP,IBA IEA,IEA,IEA,IEA,IEA,IEA,IEA,IEA,IEA,IBA IEA,IEA,IEA,IEA,IEA,IEA,IEA,IEA,IBA,IDA IMP IGI,IBA,IBA,IBA,IBA,IEA,IEA,IMP IBA IEA,IBA IEA,IBA IEA,IBA	ENSBTAG00000002069	FALSE
query_1	TRUE	6.79597e-07	1960	152	43	0.282895	0.0219388	GO:0002376	GO:BP	immune system process	18832	913	GO:0008150	IEA,IEA,IEA,IBA IEA,IMP,IBA IEA,IBA,IBA,IBA,IBA,IBA IEA,IBA IEA,IDA IMP IEA,IMP,IBA IEA,IEA,IEA,IEA,IEA,IEA,IEA,IEA,IEA,IBA IEA,IEA,IEA,IEA,IEA,IEA,IEA,IEA,IBA,IDA IMP IGI,IBA,IBA,IBA,IBA,IEA,IEA,IMP IBA IEA,IBA IEA,IBA IEA,IBA	ENSBTAG00000035744	FALSE	TRIM26
query_1	TRUE	6.79597e-07	1960	152	43	0.282895	0.0219388	GO:0002376	GO:BP	immune system process	18832	913	GO:0008150	IEA,IEA,IEA,IBA IEA,IMP,IBA IEA,IBA,IBA,IBA,IBA,IBA IEA,IBA IEA,IDA IMP IEA,IMP,IBA IEA,IEA,IEA,IEA,IEA,IEA,IEA,IEA,IEA,IBA IEA,IEA,IEA,IEA,IEA,IEA,IEA,IEA,IBA,IDA IMP IGI,IBA,IBA,IBA,IBA,IEA,IEA,IMP IBA IEA,IBA IEA,IBA IEA,IBA	ENSBTAG00000005400	FALSE	ATG5
query_1	TRUE	6.79597e-07	1960	152	43	0.282895	0.0219388	GO:0002376	GO:BP	immune system process	18832	913	GO:0008150	IEA,IEA,IEA,IBA IEA,IMP,IBA IEA,IBA,IBA,IBA,IBA,IBA IEA,IBA IEA,IDA IMP IEA,IMP,IBA IEA,IEA,IEA,IEA,IEA,IEA,IEA,IEA,IEA,IBA IEA,IEA,IEA,IEA,IEA,IEA,IEA,IEA,IBA,IDA IMP IGI,IBA,IBA,IBA,IBA,IEA,IEA,IMP IBA IEA,IBA IEA,IBA IEA,IBA	ENSBTAG00000000816	FALSE	PRDM1
query_1	TRUE	6.79597e-07	1960	152	43	0.282895	0.0219388	GO:0002376	GO:BP	immune system process	18832	913	GO:0008150	IEA,IEA,IEA,IBA IEA,IMP,IBA IEA,IBA,IBA,IBA,IBA,IBA IEA,IBA IEA,IDA IMP IEA,IMP,IBA IEA,IEA,IEA,IEA,IEA,IEA,IEA,IEA,IEA,IBA IEA,IEA,IEA,IEA,IEA,IEA,IEA,IEA,IBA,IDA IMP IGI,IBA,IBA,IBA,IBA,IEA,IEA,IMP IBA IEA,IBA IEA,IBA IEA,IBA	ENSBTAG00000062774	FALSE	VTCN1
query_1	TRUE	6.79597e-07	1960	152	43	0.282895	0.0219388	GO:0002376	GO:BP	immune system process	18832	913	GO:0008150	IEA,IEA,IEA,IBA IEA,IMP,IBA IEA,IBA,IBA,IBA,IBA,IBA IEA,IBA IEA,IDA IMP IEA,IMP,IBA IEA,IEA,IEA,IEA,IEA,IEA,IEA,IEA,IEA,IBA IEA,IEA,IEA,IEA,IEA,IEA,IEA,IEA,IBA,IDA IMP IGI,IBA,IBA,IBA,IBA,IEA,IEA,IMP IBA IEA,IBA IEA,IBA IEA,IBA	ENSBTAG00000003364	FALSE	DEFB119
query_1	TRUE	6.79597e-07	1960	152	43	0.282895	0.0219388	GO:0002376	GO:BP	immune system process	18832	913	GO:0008150	IEA,IEA,IEA,IBA IEA,IMP,IBA IEA,IBA,IBA,IBA,IBA,IBA IEA,IBA IEA,IDA IMP IEA,IMP,IBA IEA,IEA,IEA,IEA,IEA,IEA,IEA,IEA,IEA,IBA IEA,IEA,IEA,IEA,IEA,IEA,IEA,IEA,IBA,IDA IMP IGI,IBA,IBA,IBA,IBA,IEA,IEA,IMP IBA IEA,IBA IEA,IBA IEA,IBA	ENSBTAG00000031402	FALSE	ASXL1
query_1	TRUE	6.79597e-07	1960	152	43	0.282895	0.0219388	GO:0002376	GO:BP	immune system process	18832	913	GO:0008150	IEA,IEA,IEA,IBA IEA,IMP,IBA IEA,IBA,IBA,IBA,IBA,IBA IEA,IBA IEA,IDA IMP IEA,IMP,IBA IEA,IEA,IEA,IEA,IEA,IEA,IEA,IEA,IEA,IBA IEA,IEA,IEA,IEA,IEA,IEA,IEA,IEA,IBA,IDA IMP IGI,IBA,IBA,IBA,IBA,IEA,IEA,IMP IBA IEA,IBA IEA,IBA IEA,IBA	ENSBTAG00000052478	FALSE	DEFB116
query_1	TRUE	6.79597e-07	1960	152	43	0.282895	0.0219388	GO:0002376	GO:BP	immune system process	18832	913	GO:0008150	IEA,IEA,IEA,IBA IEA,IMP,IBA IEA,IBA,IBA,IBA,IBA,IBA IEA,IBA IEA,IDA IMP IEA,IMP,IBA IEA,IEA,IEA,IEA,IEA,IEA,IEA,IEA,IEA,IBA IEA,IEA,IEA,IEA,IEA,IEA,IEA,IEA,IBA,IDA IMP IGI,IBA,IBA,IBA,IBA,IEA,IEA,IMP IBA IEA,IBA IEA,IBA IEA,IBA	ENSBTAG00000048009	FALSE
query_1	TRUE	6.79597e-07	1960	152	43	0.282895	0.0219388	GO:0002376	GO:BP	immune system process	18832	913	GO:0008150	IEA,IEA,IEA,IBA IEA,IMP,IBA IEA,IBA,IBA,IBA,IBA,IBA IEA,IBA IEA,IDA IMP IEA,IMP,IBA IEA,IEA,IEA,IEA,IEA,IEA,IEA,IEA,IEA,IBA IEA,IEA,IEA,IEA,IEA,IEA,IEA,IEA,IBA,IDA IMP IGI,IBA,IBA,IBA,IBA,IEA,IEA,IMP IBA IEA,IBA IEA,IBA IEA,IBA	ENSBTAG00000048949	FALSE	DEFB121
query_1	TRUE	6.79597e-07	1960	152	43	0.282895	0.0219388	GO:0002376	GO:BP	immune system process	18832	913	GO:0008150	IEA,IEA,IEA,IBA IEA,IMP,IBA IEA,IBA,IBA,IBA,IBA,IBA IEA,IBA IEA,IDA IMP IEA,IMP,IBA IEA,IEA,IEA,IEA,IEA,IEA,IEA,IEA,IEA,IBA IEA,IEA,IEA,IEA,IEA,IEA,IEA,IEA,IBA,IDA IMP IGI,IBA,IBA,IBA,IBA,IEA,IEA,IMP IBA IEA,IBA IEA,IBA IEA,IBA	ENSBTAG00000027384	FALSE	DEFB122A
query_1	TRUE	6.79597e-07	1960	152	43	0.282895	0.0219388	GO:0002376	GO:BP	immune system process	18832	913	GO:0008150	IEA,IEA,IEA,IBA IEA,IMP,IBA IEA,IBA,IBA,IBA,IBA,IBA IEA,IBA IEA,IDA IMP IEA,IMP,IBA IEA,IEA,IEA,IEA,IEA,IEA,IEA,IEA,IEA,IBA IEA,IEA,IEA,IEA,IEA,IEA,IEA,IEA,IBA,IDA IMP IGI,IBA,IBA,IBA,IBA,IEA,IEA,IMP IBA IEA,IBA IEA,IBA IEA,IBA	ENSBTAG00000027383	FALSE	DEFB122
query_1	TRUE	6.79597e-07	1960	152	43	0.282895	0.0219388	GO:0002376	GO:BP	immune system process	18832	913	GO:0008150	IEA,IEA,IEA,IBA IEA,IMP,IBA IEA,IBA,IBA,IBA,IBA,IBA IEA,IBA IEA,IDA IMP IEA,IMP,IBA IEA,IEA,IEA,IEA,IEA,IEA,IEA,IEA,IEA,IBA IEA,IEA,IEA,IEA,IEA,IEA,IEA,IEA,IBA,IDA IMP IGI,IBA,IBA,IBA,IBA,IEA,IEA,IMP IBA IEA,IBA IEA,IBA IEA,IBA	ENSBTAG00000020555	FALSE	DEFB123
query_1	TRUE	6.79597e-07	1960	152	43	0.282895	0.0219388	GO:0002376	GO:BP	immune system process	18832	913	GO:0008150	IEA,IEA,IEA,IBA IEA,IMP,IBA IEA,IBA,IBA,IBA,IBA,IBA IEA,IBA IEA,IDA IMP IEA,IMP,IBA IEA,IEA,IEA,IEA,IEA,IEA,IEA,IEA,IEA,IBA IEA,IEA,IEA,IEA,IEA,IEA,IEA,IEA,IBA,IDA IMP IGI,IBA,IBA,IBA,IBA,IEA,IEA,IMP IBA IEA,IBA IEA,IBA IEA,IBA	ENSBTAG00000063404	FALSE	DEFB124
query_1	TRUE	6.79597e-07	1960	152	43	0.282895	0.0219388	GO:0002376	GO:BP	immune system process	18832	913	GO:0008150	IEA,IEA,IEA,IBA IEA,IMP,IBA IEA,IBA,IBA,IBA,IBA,IBA IEA,IBA IEA,IDA IMP IEA,IMP,IBA IEA,IEA,IEA,IEA,IEA,IEA,IEA,IEA,IEA,IBA IEA,IEA,IEA,IEA,IEA,IEA,IEA,IEA,IBA,IDA IMP IGI,IBA,IBA,IBA,IBA,IEA,IEA,IMP IBA IEA,IBA IEA,IBA IEA,IBA	ENSBTAG00000007932	FALSE	HCK
query_1	TRUE	6.79597e-07	1960	152	43	0.282895	0.0219388	GO:0002376	GO:BP	immune system process	18832	913	GO:0008150	IEA,IEA,IEA,IBA IEA,IMP,IBA IEA,IBA,IBA,IBA,IBA,IBA IEA,IBA IEA,IDA IMP IEA,IMP,IBA IEA,IEA,IEA,IEA,IEA,IEA,IEA,IEA,IEA,IBA IEA,IEA,IEA,IEA,IEA,IEA,IEA,IEA,IBA,IDA IMP IGI,IBA,IBA,IBA,IBA,IEA,IEA,IMP IBA IEA,IBA IEA,IBA IEA,IBA	ENSBTAG00000054958	FALSE	DEFB127
query_1	TRUE	6.79597e-07	1960	152	43	0.282895	0.0219388	GO:0002376	GO:BP	immune system process	18832	913	GO:0008150	IEA,IEA,IEA,IBA IEA,IMP,IBA IEA,IBA,IBA,IBA,IBA,IBA IEA,IBA IEA,IDA IMP IEA,IMP,IBA IEA,IEA,IEA,IEA,IEA,IEA,IEA,IEA,IEA,IBA IEA,IEA,IEA,IEA,IEA,IEA,IEA,IEA,IBA,IDA IMP IGI,IBA,IBA,IBA,IBA,IEA,IEA,IMP IBA IEA,IBA IEA,IBA IEA,IBA	ENSBTAG00000051033	FALSE
query_1	TRUE	6.79597e-07	1960	152	43	0.282895	0.0219388	GO:0002376	GO:BP	immune system process	18832	913	GO:0008150	IEA,IEA,IEA,IBA IEA,IMP,IBA IEA,IBA,IBA,IBA,IBA,IBA IEA,IBA IEA,IDA IMP IEA,IMP,IBA IEA,IEA,IEA,IEA,IEA,IEA,IEA,IEA,IEA,IBA IEA,IEA,IEA,IEA,IEA,IEA,IEA,IEA,IBA,IDA IMP IGI,IBA,IBA,IBA,IBA,IEA,IEA,IMP IBA IEA,IBA IEA,IBA IEA,IBA	ENSBTAG00000053093	FALSE
query_1	TRUE	6.79597e-07	1960	152	43	0.282895	0.0219388	GO:0002376	GO:BP	immune system process	18832	913	GO:0008150	IEA,IEA,IEA,IBA IEA,IMP,IBA IEA,IBA,IBA,IBA,IBA,IBA IEA,IBA IEA,IDA IMP IEA,IMP,IBA IEA,IEA,IEA,IEA,IEA,IEA,IEA,IEA,IEA,IBA IEA,IEA,IEA,IEA,IEA,IEA,IEA,IEA,IBA,IDA IMP IGI,IBA,IBA,IBA,IBA,IEA,IEA,IMP IBA IEA,IBA IEA,IBA IEA,IBA	ENSBTAG00000049328	FALSE
query_1	TRUE	6.79597e-07	1960	152	43	0.282895	0.0219388	GO:0002376	GO:BP	immune system process	18832	913	GO:0008150	IEA,IEA,IEA,IBA IEA,IMP,IBA IEA,IBA,IBA,IBA,IBA,IBA IEA,IBA IEA,IDA IMP IEA,IMP,IBA IEA,IEA,IEA,IEA,IEA,IEA,IEA,IEA,IEA,IBA IEA,IEA,IEA,IEA,IEA,IEA,IEA,IEA,IBA,IDA IMP IGI,IBA,IBA,IBA,IBA,IEA,IEA,IMP IBA IEA,IBA IEA,IBA IEA,IBA	ENSBTAG00000049491	FALSE	DEFB115
query_1	TRUE	6.79597e-07	1960	152	43	0.282895	0.0219388	GO:0002376	GO:BP	immune system process	18832	913	GO:0008150	IEA,IEA,IEA,IBA IEA,IMP,IBA IEA,IBA,IBA,IBA,IBA,IBA IEA,IBA IEA,IDA IMP IEA,IMP,IBA IEA,IEA,IEA,IEA,IEA,IEA,IEA,IEA,IEA,IBA IEA,IEA,IEA,IEA,IEA,IEA,IEA,IEA,IBA,IDA IMP IGI,IBA,IBA,IBA,IBA,IEA,IEA,IMP IBA IEA,IBA IEA,IBA IEA,IBA	ENSBTAG00000050556	FALSE
query_1	TRUE	6.79597e-07	1960	152	43	0.282895	0.0219388	GO:0002376	GO:BP	immune system process	18832	913	GO:0008150	IEA,IEA,IEA,IBA IEA,IMP,IBA IEA,IBA,IBA,IBA,IBA,IBA IEA,IBA IEA,IDA IMP IEA,IMP,IBA IEA,IEA,IEA,IEA,IEA,IEA,IEA,IEA,IEA,IBA IEA,IEA,IEA,IEA,IEA,IEA,IEA,IEA,IBA,IDA IMP IGI,IBA,IBA,IBA,IBA,IEA,IEA,IMP IBA IEA,IBA IEA,IBA IEA,IBA	ENSBTAG00000038042	FALSE	CXCR2
query_1	TRUE	6.79597e-07	1960	152	43	0.282895	0.0219388	GO:0002376	GO:BP	immune system process	18832	913	GO:0008150	IEA,IEA,IEA,IBA IEA,IMP,IBA IEA,IBA,IBA,IBA,IBA,IBA IEA,IBA IEA,IDA IMP IEA,IMP,IBA IEA,IEA,IEA,IEA,IEA,IEA,IEA,IEA,IEA,IBA IEA,IEA,IEA,IEA,IEA,IEA,IEA,IEA,IBA,IDA IMP IGI,IBA,IBA,IBA,IBA,IEA,IEA,IMP IBA IEA,IBA IEA,IBA IEA,IBA	ENSBTAG00000021761	FALSE	BRAF
query_1	TRUE	6.79597e-07	1960	152	43	0.282895	0.0219388	GO:0002376	GO:BP	immune system process	18832	913	GO:0008150	IEA,IEA,IEA,IBA IEA,IMP,IBA IEA,IBA,IBA,IBA,IBA,IBA IEA,IBA IEA,IDA IMP IEA,IMP,IBA IEA,IEA,IEA,IEA,IEA,IEA,IEA,IEA,IEA,IBA IEA,IEA,IEA,IEA,IEA,IEA,IEA,IEA,IBA,IDA IMP IGI,IBA,IBA,IBA,IBA,IEA,IEA,IMP IBA IEA,IBA IEA,IBA IEA,IBA	ENSBTAG00000047185	FALSE
query_1	TRUE	6.79597e-07	1960	152	43	0.282895	0.0219388	GO:0002376	GO:BP	immune system process	18832	913	GO:0008150	IEA,IEA,IEA,IBA IEA,IMP,IBA IEA,IBA,IBA,IBA,IBA,IBA IEA,IBA IEA,IDA IMP IEA,IMP,IBA IEA,IEA,IEA,IEA,IEA,IEA,IEA,IEA,IEA,IBA IEA,IEA,IEA,IEA,IEA,IEA,IEA,IEA,IBA,IDA IMP IGI,IBA,IBA,IBA,IBA,IEA,IEA,IMP IBA IEA,IBA IEA,IBA IEA,IBA	ENSBTAG00000050329	FALSE
query_1	TRUE	6.79597e-07	1960	152	43	0.282895	0.0219388	GO:0002376	GO:BP	immune system process	18832	913	GO:0008150	IEA,IEA,IEA,IBA IEA,IMP,IBA IEA,IBA,IBA,IBA,IBA,IBA IEA,IBA IEA,IDA IMP IEA,IMP,IBA IEA,IEA,IEA,IEA,IEA,IEA,IEA,IEA,IEA,IBA IEA,IEA,IEA,IEA,IEA,IEA,IEA,IEA,IBA,IDA IMP IGI,IBA,IBA,IBA,IBA,IEA,IEA,IMP IBA IEA,IBA IEA,IBA IEA,IBA	ENSBTAG00000051611	FALSE
query_1	TRUE	6.79597e-07	1960	152	43	0.282895	0.0219388	GO:0002376	GO:BP	immune system process	18832	913	GO:0008150	IEA,IEA,IEA,IBA IEA,IMP,IBA IEA,IBA,IBA,IBA,IBA,IBA IEA,IBA IEA,IDA IMP IEA,IMP,IBA IEA,IEA,IEA,IEA,IEA,IEA,IEA,IEA,IEA,IBA IEA,IEA,IEA,IEA,IEA,IEA,IEA,IEA,IBA,IDA IMP IGI,IBA,IBA,IBA,IBA,IEA,IEA,IMP IBA IEA,IBA IEA,IBA IEA,IBA	ENSBTAG00000051342	FALSE
query_1	TRUE	6.79597e-07	1960	152	43	0.282895	0.0219388	GO:0002376	GO:BP	immune system process	18832	913	GO:0008150	IEA,IEA,IEA,IBA IEA,IMP,IBA IEA,IBA,IBA,IBA,IBA,IBA IEA,IBA IEA,IDA IMP IEA,IMP,IBA IEA,IEA,IEA,IEA,IEA,IEA,IEA,IEA,IEA,IBA IEA,IEA,IEA,IEA,IEA,IEA,IEA,IEA,IBA,IDA IMP IGI,IBA,IBA,IBA,IBA,IEA,IEA,IMP IBA IEA,IBA IEA,IBA IEA,IBA	ENSBTAG00000060313	FALSE	IL36A
query_1	TRUE	6.79597e-07	1960	152	43	0.282895	0.0219388	GO:0002376	GO:BP	immune system process	18832	913	GO:0008150	IEA,IEA,IEA,IBA IEA,IMP,IBA IEA,IBA,IBA,IBA,IBA,IBA IEA,IBA IEA,IDA IMP IEA,IMP,IBA IEA,IEA,IEA,IEA,IEA,IEA,IEA,IEA,IEA,IBA IEA,IEA,IEA,IEA,IEA,IEA,IEA,IEA,IBA,IDA IMP IGI,IBA,IBA,IBA,IBA,IEA,IEA,IMP IBA IEA,IBA IEA,IBA IEA,IBA	ENSBTAG00000059479	FALSE
query_1	TRUE	6.79597e-07	1960	152	43	0.282895	0.0219388	GO:0002376	GO:BP	immune system process	18832	913	GO:0008150	IEA,IEA,IEA,IBA IEA,IMP,IBA IEA,IBA,IBA,IBA,IBA,IBA IEA,IBA IEA,IDA IMP IEA,IMP,IBA IEA,IEA,IEA,IEA,IEA,IEA,IEA,IEA,IEA,IBA IEA,IEA,IEA,IEA,IEA,IEA,IEA,IEA,IBA,IDA IMP IGI,IBA,IBA,IBA,IBA,IEA,IEA,IMP IBA IEA,IBA IEA,IBA IEA,IBA	ENSBTAG00000039839	FALSE	IL36RN
query_1	TRUE	6.79597e-07	1960	152	43	0.282895	0.0219388	GO:0002376	GO:BP	immune system process	18832	913	GO:0008150	IEA,IEA,IEA,IBA IEA,IMP,IBA IEA,IBA,IBA,IBA,IBA,IBA IEA,IBA IEA,IDA IMP IEA,IMP,IBA IEA,IEA,IEA,IEA,IEA,IEA,IEA,IEA,IEA,IBA IEA,IEA,IEA,IEA,IEA,IEA,IEA,IEA,IBA,IDA IMP IGI,IBA,IBA,IBA,IBA,IEA,IEA,IMP IBA IEA,IBA IEA,IBA IEA,IBA	ENSBTAG00000018012	FALSE	IL1F10
query_1	TRUE	6.79597e-07	1960	152	43	0.282895	0.0219388	GO:0002376	GO:BP	immune system process	18832	913	GO:0008150	IEA,IEA,IEA,IBA IEA,IMP,IBA IEA,IBA,IBA,IBA,IBA,IBA IEA,IBA IEA,IDA IMP IEA,IMP,IBA IEA,IEA,IEA,IEA,IEA,IEA,IEA,IEA,IEA,IBA IEA,IEA,IEA,IEA,IEA,IEA,IEA,IEA,IBA,IDA IMP IGI,IBA,IBA,IBA,IBA,IEA,IEA,IMP IBA IEA,IBA IEA,IBA IEA,IBA	ENSBTAG00000019665	FALSE	IL1RN
query_1	TRUE	6.79597e-07	1960	152	43	0.282895	0.0219388	GO:0002376	GO:BP	immune system process	18832	913	GO:0008150	IEA,IEA,IEA,IBA IEA,IMP,IBA IEA,IBA,IBA,IBA,IBA,IBA IEA,IBA IEA,IDA IMP IEA,IMP,IBA IEA,IEA,IEA,IEA,IEA,IEA,IEA,IEA,IEA,IBA IEA,IEA,IEA,IEA,IEA,IEA,IEA,IEA,IBA,IDA IMP IGI,IBA,IBA,IBA,IBA,IEA,IEA,IMP IBA IEA,IBA IEA,IBA IEA,IBA	ENSBTAG00000003408	FALSE
query_1	TRUE	1.31571e-06	249	152	15	0.0986842	0.060241	GO:0042742	GO:BP	defense response to bacterium	18832	10684	GO:0009617, GO:0098542	IBA,IEA,IEA,IEA,IEA,IEA,IEA,IEA,IEA,IEA,IEA,IEA,IEA,IEA,IEA	ENSBTAG00000003326	FALSE	NAIP
query_1	TRUE	1.31571e-06	249	152	15	0.0986842	0.060241	GO:0042742	GO:BP	defense response to bacterium	18832	10684	GO:0009617, GO:0098542	IBA,IEA,IEA,IEA,IEA,IEA,IEA,IEA,IEA,IEA,IEA,IEA,IEA,IEA,IEA	ENSBTAG00000003364	FALSE	DEFB119
query_1	TRUE	1.31571e-06	249	152	15	0.0986842	0.060241	GO:0042742	GO:BP	defense response to bacterium	18832	10684	GO:0009617, GO:0098542	IBA,IEA,IEA,IEA,IEA,IEA,IEA,IEA,IEA,IEA,IEA,IEA,IEA,IEA,IEA	ENSBTAG00000052478	FALSE	DEFB116
query_1	TRUE	1.31571e-06	249	152	15	0.0986842	0.060241	GO:0042742	GO:BP	defense response to bacterium	18832	10684	GO:0009617, GO:0098542	IBA,IEA,IEA,IEA,IEA,IEA,IEA,IEA,IEA,IEA,IEA,IEA,IEA,IEA,IEA	ENSBTAG00000048009	FALSE
query_1	TRUE	1.31571e-06	249	152	15	0.0986842	0.060241	GO:0042742	GO:BP	defense response to bacterium	18832	10684	GO:0009617, GO:0098542	IBA,IEA,IEA,IEA,IEA,IEA,IEA,IEA,IEA,IEA,IEA,IEA,IEA,IEA,IEA	ENSBTAG00000048949	FALSE	DEFB121
query_1	TRUE	1.31571e-06	249	152	15	0.0986842	0.060241	GO:0042742	GO:BP	defense response to bacterium	18832	10684	GO:0009617, GO:0098542	IBA,IEA,IEA,IEA,IEA,IEA,IEA,IEA,IEA,IEA,IEA,IEA,IEA,IEA,IEA	ENSBTAG00000027384	FALSE	DEFB122A
query_1	TRUE	1.31571e-06	249	152	15	0.0986842	0.060241	GO:0042742	GO:BP	defense response to bacterium	18832	10684	GO:0009617, GO:0098542	IBA,IEA,IEA,IEA,IEA,IEA,IEA,IEA,IEA,IEA,IEA,IEA,IEA,IEA,IEA	ENSBTAG00000027383	FALSE	DEFB122
query_1	TRUE	1.31571e-06	249	152	15	0.0986842	0.060241	GO:0042742	GO:BP	defense response to bacterium	18832	10684	GO:0009617, GO:0098542	IBA,IEA,IEA,IEA,IEA,IEA,IEA,IEA,IEA,IEA,IEA,IEA,IEA,IEA,IEA	ENSBTAG00000020555	FALSE	DEFB123
query_1	TRUE	1.31571e-06	249	152	15	0.0986842	0.060241	GO:0042742	GO:BP	defense response to bacterium	18832	10684	GO:0009617, GO:0098542	IBA,IEA,IEA,IEA,IEA,IEA,IEA,IEA,IEA,IEA,IEA,IEA,IEA,IEA,IEA	ENSBTAG00000063404	FALSE	DEFB124
query_1	TRUE	1.31571e-06	249	152	15	0.0986842	0.060241	GO:0042742	GO:BP	defense response to bacterium	18832	10684	GO:0009617, GO:0098542	IBA,IEA,IEA,IEA,IEA,IEA,IEA,IEA,IEA,IEA,IEA,IEA,IEA,IEA,IEA	ENSBTAG00000054958	FALSE	DEFB127
query_1	TRUE	1.31571e-06	249	152	15	0.0986842	0.060241	GO:0042742	GO:BP	defense response to bacterium	18832	10684	GO:0009617, GO:0098542	IBA,IEA,IEA,IEA,IEA,IEA,IEA,IEA,IEA,IEA,IEA,IEA,IEA,IEA,IEA	ENSBTAG00000051033	FALSE
query_1	TRUE	1.31571e-06	249	152	15	0.0986842	0.060241	GO:0042742	GO:BP	defense response to bacterium	18832	10684	GO:0009617, GO:0098542	IBA,IEA,IEA,IEA,IEA,IEA,IEA,IEA,IEA,IEA,IEA,IEA,IEA,IEA,IEA	ENSBTAG00000053093	FALSE
query_1	TRUE	1.31571e-06	249	152	15	0.0986842	0.060241	GO:0042742	GO:BP	defense response to bacterium	18832	10684	GO:0009617, GO:0098542	IBA,IEA,IEA,IEA,IEA,IEA,IEA,IEA,IEA,IEA,IEA,IEA,IEA,IEA,IEA	ENSBTAG00000049328	FALSE
query_1	TRUE	1.31571e-06	249	152	15	0.0986842	0.060241	GO:0042742	GO:BP	defense response to bacterium	18832	10684	GO:0009617, GO:0098542	IBA,IEA,IEA,IEA,IEA,IEA,IEA,IEA,IEA,IEA,IEA,IEA,IEA,IEA,IEA	ENSBTAG00000049491	FALSE	DEFB115
query_1	TRUE	1.31571e-06	249	152	15	0.0986842	0.060241	GO:0042742	GO:BP	defense response to bacterium	18832	10684	GO:0009617, GO:0098542	IBA,IEA,IEA,IEA,IEA,IEA,IEA,IEA,IEA,IEA,IEA,IEA,IEA,IEA,IEA	ENSBTAG00000050556	FALSE
query_1	TRUE	7.13834e-06	482	152	19	0.125	0.0394191	GO:0009617	GO:BP	response to bacterium	18832	3580	GO:0051707	IEA,IBA,IEP,IEA,IEA,IEA,IEA,IEA,IEA,IEA,IBA IEA,IEA,IEA,IEA,IEA,IEA,IEA,IBA,IBA	ENSBTAG00000021841	FALSE	CHD7
query_1	TRUE	7.13834e-06	482	152	19	0.125	0.0394191	GO:0009617	GO:BP	response to bacterium	18832	3580	GO:0051707	IEA,IBA,IEP,IEA,IEA,IEA,IEA,IEA,IEA,IEA,IBA IEA,IEA,IEA,IEA,IEA,IEA,IEA,IBA,IBA	ENSBTAG00000003326	FALSE	NAIP
query_1	TRUE	7.13834e-06	482	152	19	0.125	0.0394191	GO:0009617	GO:BP	response to bacterium	18832	3580	GO:0051707	IEA,IBA,IEP,IEA,IEA,IEA,IEA,IEA,IEA,IEA,IBA IEA,IEA,IEA,IEA,IEA,IEA,IEA,IBA,IBA	ENSBTAG00000038849	FALSE	TRDN
query_1	TRUE	7.13834e-06	482	152	19	0.125	0.0394191	GO:0009617	GO:BP	response to bacterium	18832	3580	GO:0051707	IEA,IBA,IEP,IEA,IEA,IEA,IEA,IEA,IEA,IEA,IBA IEA,IEA,IEA,IEA,IEA,IEA,IEA,IBA,IBA	ENSBTAG00000003364	FALSE	DEFB119
query_1	TRUE	7.13834e-06	482	152	19	0.125	0.0394191	GO:0009617	GO:BP	response to bacterium	18832	3580	GO:0051707	IEA,IBA,IEP,IEA,IEA,IEA,IEA,IEA,IEA,IEA,IBA IEA,IEA,IEA,IEA,IEA,IEA,IEA,IBA,IBA	ENSBTAG00000052478	FALSE	DEFB116
query_1	TRUE	7.13834e-06	482	152	19	0.125	0.0394191	GO:0009617	GO:BP	response to bacterium	18832	3580	GO:0051707	IEA,IBA,IEP,IEA,IEA,IEA,IEA,IEA,IEA,IEA,IBA IEA,IEA,IEA,IEA,IEA,IEA,IEA,IBA,IBA	ENSBTAG00000048009	FALSE
query_1	TRUE	7.13834e-06	482	152	19	0.125	0.0394191	GO:0009617	GO:BP	response to bacterium	18832	3580	GO:0051707	IEA,IBA,IEP,IEA,IEA,IEA,IEA,IEA,IEA,IEA,IBA IEA,IEA,IEA,IEA,IEA,IEA,IEA,IBA,IBA	ENSBTAG00000048949	FALSE	DEFB121
query_1	TRUE	7.13834e-06	482	152	19	0.125	0.0394191	GO:0009617	GO:BP	response to bacterium	18832	3580	GO:0051707	IEA,IBA,IEP,IEA,IEA,IEA,IEA,IEA,IEA,IEA,IBA IEA,IEA,IEA,IEA,IEA,IEA,IEA,IBA,IBA	ENSBTAG00000027384	FALSE	DEFB122A
query_1	TRUE	7.13834e-06	482	152	19	0.125	0.0394191	GO:0009617	GO:BP	response to bacterium	18832	3580	GO:0051707	IEA,IBA,IEP,IEA,IEA,IEA,IEA,IEA,IEA,IEA,IBA IEA,IEA,IEA,IEA,IEA,IEA,IEA,IBA,IBA	ENSBTAG00000027383	FALSE	DEFB122
query_1	TRUE	7.13834e-06	482	152	19	0.125	0.0394191	GO:0009617	GO:BP	response to bacterium	18832	3580	GO:0051707	IEA,IBA,IEP,IEA,IEA,IEA,IEA,IEA,IEA,IEA,IBA IEA,IEA,IEA,IEA,IEA,IEA,IEA,IBA,IBA	ENSBTAG00000020555	FALSE	DEFB123
query_1	TRUE	7.13834e-06	482	152	19	0.125	0.0394191	GO:0009617	GO:BP	response to bacterium	18832	3580	GO:0051707	IEA,IBA,IEP,IEA,IEA,IEA,IEA,IEA,IEA,IEA,IBA IEA,IEA,IEA,IEA,IEA,IEA,IEA,IBA,IBA	ENSBTAG00000063404	FALSE	DEFB124
query_1	TRUE	7.13834e-06	482	152	19	0.125	0.0394191	GO:0009617	GO:BP	response to bacterium	18832	3580	GO:0051707	IEA,IBA,IEP,IEA,IEA,IEA,IEA,IEA,IEA,IEA,IBA IEA,IEA,IEA,IEA,IEA,IEA,IEA,IBA,IBA	ENSBTAG00000054958	FALSE	DEFB127
query_1	TRUE	7.13834e-06	482	152	19	0.125	0.0394191	GO:0009617	GO:BP	response to bacterium	18832	3580	GO:0051707	IEA,IBA,IEP,IEA,IEA,IEA,IEA,IEA,IEA,IEA,IBA IEA,IEA,IEA,IEA,IEA,IEA,IEA,IBA,IBA	ENSBTAG00000051033	FALSE
query_1	TRUE	7.13834e-06	482	152	19	0.125	0.0394191	GO:0009617	GO:BP	response to bacterium	18832	3580	GO:0051707	IEA,IBA,IEP,IEA,IEA,IEA,IEA,IEA,IEA,IEA,IBA IEA,IEA,IEA,IEA,IEA,IEA,IEA,IBA,IBA	ENSBTAG00000053093	FALSE
query_1	TRUE	7.13834e-06	482	152	19	0.125	0.0394191	GO:0009617	GO:BP	response to bacterium	18832	3580	GO:0051707	IEA,IBA,IEP,IEA,IEA,IEA,IEA,IEA,IEA,IEA,IBA IEA,IEA,IEA,IEA,IEA,IEA,IEA,IBA,IBA	ENSBTAG00000049328	FALSE
query_1	TRUE	7.13834e-06	482	152	19	0.125	0.0394191	GO:0009617	GO:BP	response to bacterium	18832	3580	GO:0051707	IEA,IBA,IEP,IEA,IEA,IEA,IEA,IEA,IEA,IEA,IBA IEA,IEA,IEA,IEA,IEA,IEA,IEA,IBA,IBA	ENSBTAG00000049491	FALSE	DEFB115
query_1	TRUE	7.13834e-06	482	152	19	0.125	0.0394191	GO:0009617	GO:BP	response to bacterium	18832	3580	GO:0051707	IEA,IBA,IEP,IEA,IEA,IEA,IEA,IEA,IEA,IEA,IBA IEA,IEA,IEA,IEA,IEA,IEA,IEA,IBA,IBA	ENSBTAG00000050556	FALSE
query_1	TRUE	7.13834e-06	482	152	19	0.125	0.0394191	GO:0009617	GO:BP	response to bacterium	18832	3580	GO:0051707	IEA,IBA,IEP,IEA,IEA,IEA,IEA,IEA,IEA,IEA,IBA IEA,IEA,IEA,IEA,IEA,IEA,IEA,IBA,IBA	ENSBTAG00000039839	FALSE	IL36RN
query_1	TRUE	7.13834e-06	482	152	19	0.125	0.0394191	GO:0009617	GO:BP	response to bacterium	18832	3580	GO:0051707	IEA,IBA,IEP,IEA,IEA,IEA,IEA,IEA,IEA,IEA,IBA IEA,IEA,IEA,IEA,IEA,IEA,IEA,IBA,IBA	ENSBTAG00000018012	FALSE	IL1F10
query_1	TRUE	1.6488e-05	629	152	21	0.138158	0.0333863	GO:0045087	GO:BP	innate immune response	18832	11659	GO:0006955, GO:0140546	IEA,IMP,IBA IEA,IBA,IBA,IBA IEA,IDA,IEA,IEA,IEA,IEA,IEA,IEA,IEA,IEA,IEA,IEA,IEA,IEA,IEA,IEA	ENSBTAG00000011929	FALSE	USP50
query_1	TRUE	1.6488e-05	629	152	21	0.138158	0.0333863	GO:0045087	GO:BP	innate immune response	18832	11659	GO:0006955, GO:0140546	IEA,IMP,IBA IEA,IBA,IBA,IBA IEA,IDA,IEA,IEA,IEA,IEA,IEA,IEA,IEA,IEA,IEA,IEA,IEA,IEA,IEA,IEA	ENSBTAG00000007532	FALSE	TRIM15
query_1	TRUE	1.6488e-05	629	152	21	0.138158	0.0333863	GO:0045087	GO:BP	innate immune response	18832	11659	GO:0006955, GO:0140546	IEA,IMP,IBA IEA,IBA,IBA,IBA IEA,IDA,IEA,IEA,IEA,IEA,IEA,IEA,IEA,IEA,IEA,IEA,IEA,IEA,IEA,IEA	ENSBTAG00000007530	FALSE	TRIM10
query_1	TRUE	1.6488e-05	629	152	21	0.138158	0.0333863	GO:0045087	GO:BP	innate immune response	18832	11659	GO:0006955, GO:0140546	IEA,IMP,IBA IEA,IBA,IBA,IBA IEA,IDA,IEA,IEA,IEA,IEA,IEA,IEA,IEA,IEA,IEA,IEA,IEA,IEA,IEA,IEA	ENSBTAG00000037381	FALSE	TRIM40
query_1	TRUE	1.6488e-05	629	152	21	0.138158	0.0333863	GO:0045087	GO:BP	innate immune response	18832	11659	GO:0006955, GO:0140546	IEA,IMP,IBA IEA,IBA,IBA,IBA IEA,IDA,IEA,IEA,IEA,IEA,IEA,IEA,IEA,IEA,IEA,IEA,IEA,IEA,IEA,IEA	ENSBTAG00000004490	FALSE	TRIM31
query_1	TRUE	1.6488e-05	629	152	21	0.138158	0.0333863	GO:0045087	GO:BP	innate immune response	18832	11659	GO:0006955, GO:0140546	IEA,IMP,IBA IEA,IBA,IBA,IBA IEA,IDA,IEA,IEA,IEA,IEA,IEA,IEA,IEA,IEA,IEA,IEA,IEA,IEA,IEA,IEA	ENSBTAG00000035744	FALSE	TRIM26
query_1	TRUE	1.6488e-05	629	152	21	0.138158	0.0333863	GO:0045087	GO:BP	innate immune response	18832	11659	GO:0006955, GO:0140546	IEA,IMP,IBA IEA,IBA,IBA,IBA IEA,IDA,IEA,IEA,IEA,IEA,IEA,IEA,IEA,IEA,IEA,IEA,IEA,IEA,IEA,IEA	ENSBTAG00000005400	FALSE	ATG5
query_1	TRUE	1.6488e-05	629	152	21	0.138158	0.0333863	GO:0045087	GO:BP	innate immune response	18832	11659	GO:0006955, GO:0140546	IEA,IMP,IBA IEA,IBA,IBA,IBA IEA,IDA,IEA,IEA,IEA,IEA,IEA,IEA,IEA,IEA,IEA,IEA,IEA,IEA,IEA,IEA	ENSBTAG00000003364	FALSE	DEFB119
query_1	TRUE	1.6488e-05	629	152	21	0.138158	0.0333863	GO:0045087	GO:BP	innate immune response	18832	11659	GO:0006955, GO:0140546	IEA,IMP,IBA IEA,IBA,IBA,IBA IEA,IDA,IEA,IEA,IEA,IEA,IEA,IEA,IEA,IEA,IEA,IEA,IEA,IEA,IEA,IEA	ENSBTAG00000052478	FALSE	DEFB116
query_1	TRUE	1.6488e-05	629	152	21	0.138158	0.0333863	GO:0045087	GO:BP	innate immune response	18832	11659	GO:0006955, GO:0140546	IEA,IMP,IBA IEA,IBA,IBA,IBA IEA,IDA,IEA,IEA,IEA,IEA,IEA,IEA,IEA,IEA,IEA,IEA,IEA,IEA,IEA,IEA	ENSBTAG00000048009	FALSE
query_1	TRUE	1.6488e-05	629	152	21	0.138158	0.0333863	GO:0045087	GO:BP	innate immune response	18832	11659	GO:0006955, GO:0140546	IEA,IMP,IBA IEA,IBA,IBA,IBA IEA,IDA,IEA,IEA,IEA,IEA,IEA,IEA,IEA,IEA,IEA,IEA,IEA,IEA,IEA,IEA	ENSBTAG00000048949	FALSE	DEFB121
query_1	TRUE	1.6488e-05	629	152	21	0.138158	0.0333863	GO:0045087	GO:BP	innate immune response	18832	11659	GO:0006955, GO:0140546	IEA,IMP,IBA IEA,IBA,IBA,IBA IEA,IDA,IEA,IEA,IEA,IEA,IEA,IEA,IEA,IEA,IEA,IEA,IEA,IEA,IEA,IEA	ENSBTAG00000027384	FALSE	DEFB122A
query_1	TRUE	1.6488e-05	629	152	21	0.138158	0.0333863	GO:0045087	GO:BP	innate immune response	18832	11659	GO:0006955, GO:0140546	IEA,IMP,IBA IEA,IBA,IBA,IBA IEA,IDA,IEA,IEA,IEA,IEA,IEA,IEA,IEA,IEA,IEA,IEA,IEA,IEA,IEA,IEA	ENSBTAG00000027383	FALSE	DEFB122
query_1	TRUE	1.6488e-05	629	152	21	0.138158	0.0333863	GO:0045087	GO:BP	innate immune response	18832	11659	GO:0006955, GO:0140546	IEA,IMP,IBA IEA,IBA,IBA,IBA IEA,IDA,IEA,IEA,IEA,IEA,IEA,IEA,IEA,IEA,IEA,IEA,IEA,IEA,IEA,IEA	ENSBTAG00000020555	FALSE	DEFB123
query_1	TRUE	1.6488e-05	629	152	21	0.138158	0.0333863	GO:0045087	GO:BP	innate immune response	18832	11659	GO:0006955, GO:0140546	IEA,IMP,IBA IEA,IBA,IBA,IBA IEA,IDA,IEA,IEA,IEA,IEA,IEA,IEA,IEA,IEA,IEA,IEA,IEA,IEA,IEA,IEA	ENSBTAG00000063404	FALSE	DEFB124
query_1	TRUE	1.6488e-05	629	152	21	0.138158	0.0333863	GO:0045087	GO:BP	innate immune response	18832	11659	GO:0006955, GO:0140546	IEA,IMP,IBA IEA,IBA,IBA,IBA IEA,IDA,IEA,IEA,IEA,IEA,IEA,IEA,IEA,IEA,IEA,IEA,IEA,IEA,IEA,IEA	ENSBTAG00000054958	FALSE	DEFB127
query_1	TRUE	1.6488e-05	629	152	21	0.138158	0.0333863	GO:0045087	GO:BP	innate immune response	18832	11659	GO:0006955, GO:0140546	IEA,IMP,IBA IEA,IBA,IBA,IBA IEA,IDA,IEA,IEA,IEA,IEA,IEA,IEA,IEA,IEA,IEA,IEA,IEA,IEA,IEA,IEA	ENSBTAG00000051033	FALSE
query_1	TRUE	1.6488e-05	629	152	21	0.138158	0.0333863	GO:0045087	GO:BP	innate immune response	18832	11659	GO:0006955, GO:0140546	IEA,IMP,IBA IEA,IBA,IBA,IBA IEA,IDA,IEA,IEA,IEA,IEA,IEA,IEA,IEA,IEA,IEA,IEA,IEA,IEA,IEA,IEA	ENSBTAG00000053093	FALSE
query_1	TRUE	1.6488e-05	629	152	21	0.138158	0.0333863	GO:0045087	GO:BP	innate immune response	18832	11659	GO:0006955, GO:0140546	IEA,IMP,IBA IEA,IBA,IBA,IBA IEA,IDA,IEA,IEA,IEA,IEA,IEA,IEA,IEA,IEA,IEA,IEA,IEA,IEA,IEA,IEA	ENSBTAG00000049328	FALSE
query_1	TRUE	1.6488e-05	629	152	21	0.138158	0.0333863	GO:0045087	GO:BP	innate immune response	18832	11659	GO:0006955, GO:0140546	IEA,IMP,IBA IEA,IBA,IBA,IBA IEA,IDA,IEA,IEA,IEA,IEA,IEA,IEA,IEA,IEA,IEA,IEA,IEA,IEA,IEA,IEA	ENSBTAG00000049491	FALSE	DEFB115
query_1	TRUE	1.6488e-05	629	152	21	0.138158	0.0333863	GO:0045087	GO:BP	innate immune response	18832	11659	GO:0006955, GO:0140546	IEA,IMP,IBA IEA,IBA,IBA,IBA IEA,IDA,IEA,IEA,IEA,IEA,IEA,IEA,IEA,IEA,IEA,IEA,IEA,IEA,IEA,IEA	ENSBTAG00000050556	FALSE
query_1	TRUE	3.53669e-05	1129	152	28	0.184211	0.0248007	GO:0009607	GO:BP	response to biotic stimulus	18832	3572	GO:0050896	IEA,IEA,IBA,IDA IMP,IBA IEA,IBA,IBA,IBA IEA,IEP,IDA IMP,IEA,IEA,IEA,IEA,IEA,IEA,IEA,IEA,IBA IEA,IEA,IEA,IEA,IEA,IEA,IEA,ISS IEA,IMP IBA,IBA	ENSBTAG00000021841	FALSE	CHD7
query_1	TRUE	3.53669e-05	1129	152	28	0.184211	0.0248007	GO:0009607	GO:BP	response to biotic stimulus	18832	3572	GO:0050896	IEA,IEA,IBA,IDA IMP,IBA IEA,IBA,IBA,IBA IEA,IEP,IDA IMP,IEA,IEA,IEA,IEA,IEA,IEA,IEA,IEA,IBA IEA,IEA,IEA,IEA,IEA,IEA,IEA,ISS IEA,IMP IBA,IBA	ENSBTAG00000011929	FALSE	USP50
query_1	TRUE	3.53669e-05	1129	152	28	0.184211	0.0248007	GO:0009607	GO:BP	response to biotic stimulus	18832	3572	GO:0050896	IEA,IEA,IBA,IDA IMP,IBA IEA,IBA,IBA,IBA IEA,IEP,IDA IMP,IEA,IEA,IEA,IEA,IEA,IEA,IEA,IEA,IBA IEA,IEA,IEA,IEA,IEA,IEA,IEA,ISS IEA,IMP IBA,IBA	ENSBTAG00000003326	FALSE	NAIP
query_1	TRUE	3.53669e-05	1129	152	28	0.184211	0.0248007	GO:0009607	GO:BP	response to biotic stimulus	18832	3572	GO:0050896	IEA,IEA,IBA,IDA IMP,IBA IEA,IBA,IBA,IBA IEA,IEP,IDA IMP,IEA,IEA,IEA,IEA,IEA,IEA,IEA,IEA,IBA IEA,IEA,IEA,IEA,IEA,IEA,IEA,ISS IEA,IMP IBA,IBA	ENSBTAG00000007532	FALSE	TRIM15
query_1	TRUE	3.53669e-05	1129	152	28	0.184211	0.0248007	GO:0009607	GO:BP	response to biotic stimulus	18832	3572	GO:0050896	IEA,IEA,IBA,IDA IMP,IBA IEA,IBA,IBA,IBA IEA,IEP,IDA IMP,IEA,IEA,IEA,IEA,IEA,IEA,IEA,IEA,IBA IEA,IEA,IEA,IEA,IEA,IEA,IEA,ISS IEA,IMP IBA,IBA	ENSBTAG00000007530	FALSE	TRIM10
query_1	TRUE	3.53669e-05	1129	152	28	0.184211	0.0248007	GO:0009607	GO:BP	response to biotic stimulus	18832	3572	GO:0050896	IEA,IEA,IBA,IDA IMP,IBA IEA,IBA,IBA,IBA IEA,IEP,IDA IMP,IEA,IEA,IEA,IEA,IEA,IEA,IEA,IEA,IBA IEA,IEA,IEA,IEA,IEA,IEA,IEA,ISS IEA,IMP IBA,IBA	ENSBTAG00000037381	FALSE	TRIM40
query_1	TRUE	3.53669e-05	1129	152	28	0.184211	0.0248007	GO:0009607	GO:BP	response to biotic stimulus	18832	3572	GO:0050896	IEA,IEA,IBA,IDA IMP,IBA IEA,IBA,IBA,IBA IEA,IEP,IDA IMP,IEA,IEA,IEA,IEA,IEA,IEA,IEA,IEA,IBA IEA,IEA,IEA,IEA,IEA,IEA,IEA,ISS IEA,IMP IBA,IBA	ENSBTAG00000004490	FALSE	TRIM31
query_1	TRUE	3.53669e-05	1129	152	28	0.184211	0.0248007	GO:0009607	GO:BP	response to biotic stimulus	18832	3572	GO:0050896	IEA,IEA,IBA,IDA IMP,IBA IEA,IBA,IBA,IBA IEA,IEP,IDA IMP,IEA,IEA,IEA,IEA,IEA,IEA,IEA,IEA,IBA IEA,IEA,IEA,IEA,IEA,IEA,IEA,ISS IEA,IMP IBA,IBA	ENSBTAG00000035744	FALSE	TRIM26
query_1	TRUE	3.53669e-05	1129	152	28	0.184211	0.0248007	GO:0009607	GO:BP	response to biotic stimulus	18832	3572	GO:0050896	IEA,IEA,IBA,IDA IMP,IBA IEA,IBA,IBA,IBA IEA,IEP,IDA IMP,IEA,IEA,IEA,IEA,IEA,IEA,IEA,IEA,IBA IEA,IEA,IEA,IEA,IEA,IEA,IEA,ISS IEA,IMP IBA,IBA	ENSBTAG00000038849	FALSE	TRDN
query_1	TRUE	3.53669e-05	1129	152	28	0.184211	0.0248007	GO:0009607	GO:BP	response to biotic stimulus	18832	3572	GO:0050896	IEA,IEA,IBA,IDA IMP,IBA IEA,IBA,IBA,IBA IEA,IEP,IDA IMP,IEA,IEA,IEA,IEA,IEA,IEA,IEA,IEA,IBA IEA,IEA,IEA,IEA,IEA,IEA,IEA,ISS IEA,IMP IBA,IBA	ENSBTAG00000005400	FALSE	ATG5
query_1	TRUE	3.53669e-05	1129	152	28	0.184211	0.0248007	GO:0009607	GO:BP	response to biotic stimulus	18832	3572	GO:0050896	IEA,IEA,IBA,IDA IMP,IBA IEA,IBA,IBA,IBA IEA,IEP,IDA IMP,IEA,IEA,IEA,IEA,IEA,IEA,IEA,IEA,IBA IEA,IEA,IEA,IEA,IEA,IEA,IEA,ISS IEA,IMP IBA,IBA	ENSBTAG00000062774	FALSE	VTCN1
query_1	TRUE	3.53669e-05	1129	152	28	0.184211	0.0248007	GO:0009607	GO:BP	response to biotic stimulus	18832	3572	GO:0050896	IEA,IEA,IBA,IDA IMP,IBA IEA,IBA,IBA,IBA IEA,IEP,IDA IMP,IEA,IEA,IEA,IEA,IEA,IEA,IEA,IEA,IBA IEA,IEA,IEA,IEA,IEA,IEA,IEA,ISS IEA,IMP IBA,IBA	ENSBTAG00000003364	FALSE	DEFB119
query_1	TRUE	3.53669e-05	1129	152	28	0.184211	0.0248007	GO:0009607	GO:BP	response to biotic stimulus	18832	3572	GO:0050896	IEA,IEA,IBA,IDA IMP,IBA IEA,IBA,IBA,IBA IEA,IEP,IDA IMP,IEA,IEA,IEA,IEA,IEA,IEA,IEA,IEA,IBA IEA,IEA,IEA,IEA,IEA,IEA,IEA,ISS IEA,IMP IBA,IBA	ENSBTAG00000052478	FALSE	DEFB116
query_1	TRUE	3.53669e-05	1129	152	28	0.184211	0.0248007	GO:0009607	GO:BP	response to biotic stimulus	18832	3572	GO:0050896	IEA,IEA,IBA,IDA IMP,IBA IEA,IBA,IBA,IBA IEA,IEP,IDA IMP,IEA,IEA,IEA,IEA,IEA,IEA,IEA,IEA,IBA IEA,IEA,IEA,IEA,IEA,IEA,IEA,ISS IEA,IMP IBA,IBA	ENSBTAG00000048009	FALSE
query_1	TRUE	3.53669e-05	1129	152	28	0.184211	0.0248007	GO:0009607	GO:BP	response to biotic stimulus	18832	3572	GO:0050896	IEA,IEA,IBA,IDA IMP,IBA IEA,IBA,IBA,IBA IEA,IEP,IDA IMP,IEA,IEA,IEA,IEA,IEA,IEA,IEA,IEA,IBA IEA,IEA,IEA,IEA,IEA,IEA,IEA,ISS IEA,IMP IBA,IBA	ENSBTAG00000048949	FALSE	DEFB121
query_1	TRUE	3.53669e-05	1129	152	28	0.184211	0.0248007	GO:0009607	GO:BP	response to biotic stimulus	18832	3572	GO:0050896	IEA,IEA,IBA,IDA IMP,IBA IEA,IBA,IBA,IBA IEA,IEP,IDA IMP,IEA,IEA,IEA,IEA,IEA,IEA,IEA,IEA,IBA IEA,IEA,IEA,IEA,IEA,IEA,IEA,ISS IEA,IMP IBA,IBA	ENSBTAG00000027384	FALSE	DEFB122A
query_1	TRUE	3.53669e-05	1129	152	28	0.184211	0.0248007	GO:0009607	GO:BP	response to biotic stimulus	18832	3572	GO:0050896	IEA,IEA,IBA,IDA IMP,IBA IEA,IBA,IBA,IBA IEA,IEP,IDA IMP,IEA,IEA,IEA,IEA,IEA,IEA,IEA,IEA,IBA IEA,IEA,IEA,IEA,IEA,IEA,IEA,ISS IEA,IMP IBA,IBA	ENSBTAG00000027383	FALSE	DEFB122
query_1	TRUE	3.53669e-05	1129	152	28	0.184211	0.0248007	GO:0009607	GO:BP	response to biotic stimulus	18832	3572	GO:0050896	IEA,IEA,IBA,IDA IMP,IBA IEA,IBA,IBA,IBA IEA,IEP,IDA IMP,IEA,IEA,IEA,IEA,IEA,IEA,IEA,IEA,IBA IEA,IEA,IEA,IEA,IEA,IEA,IEA,ISS IEA,IMP IBA,IBA	ENSBTAG00000020555	FALSE	DEFB123
query_1	TRUE	3.53669e-05	1129	152	28	0.184211	0.0248007	GO:0009607	GO:BP	response to biotic stimulus	18832	3572	GO:0050896	IEA,IEA,IBA,IDA IMP,IBA IEA,IBA,IBA,IBA IEA,IEP,IDA IMP,IEA,IEA,IEA,IEA,IEA,IEA,IEA,IEA,IBA IEA,IEA,IEA,IEA,IEA,IEA,IEA,ISS IEA,IMP IBA,IBA	ENSBTAG00000063404	FALSE	DEFB124
query_1	TRUE	3.53669e-05	1129	152	28	0.184211	0.0248007	GO:0009607	GO:BP	response to biotic stimulus	18832	3572	GO:0050896	IEA,IEA,IBA,IDA IMP,IBA IEA,IBA,IBA,IBA IEA,IEP,IDA IMP,IEA,IEA,IEA,IEA,IEA,IEA,IEA,IEA,IBA IEA,IEA,IEA,IEA,IEA,IEA,IEA,ISS IEA,IMP IBA,IBA	ENSBTAG00000054958	FALSE	DEFB127
query_1	TRUE	3.53669e-05	1129	152	28	0.184211	0.0248007	GO:0009607	GO:BP	response to biotic stimulus	18832	3572	GO:0050896	IEA,IEA,IBA,IDA IMP,IBA IEA,IBA,IBA,IBA IEA,IEP,IDA IMP,IEA,IEA,IEA,IEA,IEA,IEA,IEA,IEA,IBA IEA,IEA,IEA,IEA,IEA,IEA,IEA,ISS IEA,IMP IBA,IBA	ENSBTAG00000051033	FALSE
query_1	TRUE	3.53669e-05	1129	152	28	0.184211	0.0248007	GO:0009607	GO:BP	response to biotic stimulus	18832	3572	GO:0050896	IEA,IEA,IBA,IDA IMP,IBA IEA,IBA,IBA,IBA IEA,IEP,IDA IMP,IEA,IEA,IEA,IEA,IEA,IEA,IEA,IEA,IBA IEA,IEA,IEA,IEA,IEA,IEA,IEA,ISS IEA,IMP IBA,IBA	ENSBTAG00000053093	FALSE
query_1	TRUE	3.53669e-05	1129	152	28	0.184211	0.0248007	GO:0009607	GO:BP	response to biotic stimulus	18832	3572	GO:0050896	IEA,IEA,IBA,IDA IMP,IBA IEA,IBA,IBA,IBA IEA,IEP,IDA IMP,IEA,IEA,IEA,IEA,IEA,IEA,IEA,IEA,IBA IEA,IEA,IEA,IEA,IEA,IEA,IEA,ISS IEA,IMP IBA,IBA	ENSBTAG00000049328	FALSE
query_1	TRUE	3.53669e-05	1129	152	28	0.184211	0.0248007	GO:0009607	GO:BP	response to biotic stimulus	18832	3572	GO:0050896	IEA,IEA,IBA,IDA IMP,IBA IEA,IBA,IBA,IBA IEA,IEP,IDA IMP,IEA,IEA,IEA,IEA,IEA,IEA,IEA,IEA,IBA IEA,IEA,IEA,IEA,IEA,IEA,IEA,ISS IEA,IMP IBA,IBA	ENSBTAG00000049491	FALSE	DEFB115
query_1	TRUE	3.53669e-05	1129	152	28	0.184211	0.0248007	GO:0009607	GO:BP	response to biotic stimulus	18832	3572	GO:0050896	IEA,IEA,IBA,IDA IMP,IBA IEA,IBA,IBA,IBA IEA,IEP,IDA IMP,IEA,IEA,IEA,IEA,IEA,IEA,IEA,IEA,IBA IEA,IEA,IEA,IEA,IEA,IEA,IEA,ISS IEA,IMP IBA,IBA	ENSBTAG00000050556	FALSE
query_1	TRUE	3.53669e-05	1129	152	28	0.184211	0.0248007	GO:0009607	GO:BP	response to biotic stimulus	18832	3572	GO:0050896	IEA,IEA,IBA,IDA IMP,IBA IEA,IBA,IBA,IBA IEA,IEP,IDA IMP,IEA,IEA,IEA,IEA,IEA,IEA,IEA,IEA,IBA IEA,IEA,IEA,IEA,IEA,IEA,IEA,ISS IEA,IMP IBA,IBA	ENSBTAG00000000184	FALSE	EIF2AK3
query_1	TRUE	3.53669e-05	1129	152	28	0.184211	0.0248007	GO:0009607	GO:BP	response to biotic stimulus	18832	3572	GO:0050896	IEA,IEA,IBA,IDA IMP,IBA IEA,IBA,IBA,IBA IEA,IEP,IDA IMP,IEA,IEA,IEA,IEA,IEA,IEA,IEA,IEA,IBA IEA,IEA,IEA,IEA,IEA,IEA,IEA,ISS IEA,IMP IBA,IBA	ENSBTAG00000039839	FALSE	IL36RN
query_1	TRUE	3.53669e-05	1129	152	28	0.184211	0.0248007	GO:0009607	GO:BP	response to biotic stimulus	18832	3572	GO:0050896	IEA,IEA,IBA,IDA IMP,IBA IEA,IBA,IBA,IBA IEA,IEP,IDA IMP,IEA,IEA,IEA,IEA,IEA,IEA,IEA,IEA,IBA IEA,IEA,IEA,IEA,IEA,IEA,IEA,ISS IEA,IMP IBA,IBA	ENSBTAG00000018012	FALSE	IL1F10
query_1	TRUE	5.64466e-05	1098	152	27	0.177632	0.0245902	GO:0051707	GO:BP	response to other organism	18832	14359	GO:0043207, GO:0044419	IEA,IEA,IBA,IDA IMP,IBA IEA,IBA,IBA,IBA IEA,IEP,IDA IMP,IEA,IEA,IEA,IEA,IEA,IEA,IEA,IEA,IBA IEA,IEA,IEA,IEA,IEA,IEA,IEA,IMP IBA,IBA	ENSBTAG00000021841	FALSE	CHD7
query_1	TRUE	5.64466e-05	1098	152	27	0.177632	0.0245902	GO:0051707	GO:BP	response to other organism	18832	14359	GO:0043207, GO:0044419	IEA,IEA,IBA,IDA IMP,IBA IEA,IBA,IBA,IBA IEA,IEP,IDA IMP,IEA,IEA,IEA,IEA,IEA,IEA,IEA,IEA,IBA IEA,IEA,IEA,IEA,IEA,IEA,IEA,IMP IBA,IBA	ENSBTAG00000011929	FALSE	USP50
query_1	TRUE	5.64466e-05	1098	152	27	0.177632	0.0245902	GO:0051707	GO:BP	response to other organism	18832	14359	GO:0043207, GO:0044419	IEA,IEA,IBA,IDA IMP,IBA IEA,IBA,IBA,IBA IEA,IEP,IDA IMP,IEA,IEA,IEA,IEA,IEA,IEA,IEA,IEA,IBA IEA,IEA,IEA,IEA,IEA,IEA,IEA,IMP IBA,IBA	ENSBTAG00000003326	FALSE	NAIP
query_1	TRUE	5.64466e-05	1098	152	27	0.177632	0.0245902	GO:0051707	GO:BP	response to other organism	18832	14359	GO:0043207, GO:0044419	IEA,IEA,IBA,IDA IMP,IBA IEA,IBA,IBA,IBA IEA,IEP,IDA IMP,IEA,IEA,IEA,IEA,IEA,IEA,IEA,IEA,IBA IEA,IEA,IEA,IEA,IEA,IEA,IEA,IMP IBA,IBA	ENSBTAG00000007532	FALSE	TRIM15
query_1	TRUE	5.64466e-05	1098	152	27	0.177632	0.0245902	GO:0051707	GO:BP	response to other organism	18832	14359	GO:0043207, GO:0044419	IEA,IEA,IBA,IDA IMP,IBA IEA,IBA,IBA,IBA IEA,IEP,IDA IMP,IEA,IEA,IEA,IEA,IEA,IEA,IEA,IEA,IBA IEA,IEA,IEA,IEA,IEA,IEA,IEA,IMP IBA,IBA	ENSBTAG00000007530	FALSE	TRIM10
query_1	TRUE	5.64466e-05	1098	152	27	0.177632	0.0245902	GO:0051707	GO:BP	response to other organism	18832	14359	GO:0043207, GO:0044419	IEA,IEA,IBA,IDA IMP,IBA IEA,IBA,IBA,IBA IEA,IEP,IDA IMP,IEA,IEA,IEA,IEA,IEA,IEA,IEA,IEA,IBA IEA,IEA,IEA,IEA,IEA,IEA,IEA,IMP IBA,IBA	ENSBTAG00000037381	FALSE	TRIM40
query_1	TRUE	5.64466e-05	1098	152	27	0.177632	0.0245902	GO:0051707	GO:BP	response to other organism	18832	14359	GO:0043207, GO:0044419	IEA,IEA,IBA,IDA IMP,IBA IEA,IBA,IBA,IBA IEA,IEP,IDA IMP,IEA,IEA,IEA,IEA,IEA,IEA,IEA,IEA,IBA IEA,IEA,IEA,IEA,IEA,IEA,IEA,IMP IBA,IBA	ENSBTAG00000004490	FALSE	TRIM31
query_1	TRUE	5.64466e-05	1098	152	27	0.177632	0.0245902	GO:0051707	GO:BP	response to other organism	18832	14359	GO:0043207, GO:0044419	IEA,IEA,IBA,IDA IMP,IBA IEA,IBA,IBA,IBA IEA,IEP,IDA IMP,IEA,IEA,IEA,IEA,IEA,IEA,IEA,IEA,IBA IEA,IEA,IEA,IEA,IEA,IEA,IEA,IMP IBA,IBA	ENSBTAG00000035744	FALSE	TRIM26
query_1	TRUE	5.64466e-05	1098	152	27	0.177632	0.0245902	GO:0051707	GO:BP	response to other organism	18832	14359	GO:0043207, GO:0044419	IEA,IEA,IBA,IDA IMP,IBA IEA,IBA,IBA,IBA IEA,IEP,IDA IMP,IEA,IEA,IEA,IEA,IEA,IEA,IEA,IEA,IBA IEA,IEA,IEA,IEA,IEA,IEA,IEA,IMP IBA,IBA	ENSBTAG00000038849	FALSE	TRDN
query_1	TRUE	5.64466e-05	1098	152	27	0.177632	0.0245902	GO:0051707	GO:BP	response to other organism	18832	14359	GO:0043207, GO:0044419	IEA,IEA,IBA,IDA IMP,IBA IEA,IBA,IBA,IBA IEA,IEP,IDA IMP,IEA,IEA,IEA,IEA,IEA,IEA,IEA,IEA,IBA IEA,IEA,IEA,IEA,IEA,IEA,IEA,IMP IBA,IBA	ENSBTAG00000005400	FALSE	ATG5
query_1	TRUE	5.64466e-05	1098	152	27	0.177632	0.0245902	GO:0051707	GO:BP	response to other organism	18832	14359	GO:0043207, GO:0044419	IEA,IEA,IBA,IDA IMP,IBA IEA,IBA,IBA,IBA IEA,IEP,IDA IMP,IEA,IEA,IEA,IEA,IEA,IEA,IEA,IEA,IBA IEA,IEA,IEA,IEA,IEA,IEA,IEA,IMP IBA,IBA	ENSBTAG00000062774	FALSE	VTCN1
query_1	TRUE	5.64466e-05	1098	152	27	0.177632	0.0245902	GO:0051707	GO:BP	response to other organism	18832	14359	GO:0043207, GO:0044419	IEA,IEA,IBA,IDA IMP,IBA IEA,IBA,IBA,IBA IEA,IEP,IDA IMP,IEA,IEA,IEA,IEA,IEA,IEA,IEA,IEA,IBA IEA,IEA,IEA,IEA,IEA,IEA,IEA,IMP IBA,IBA	ENSBTAG00000003364	FALSE	DEFB119
query_1	TRUE	5.64466e-05	1098	152	27	0.177632	0.0245902	GO:0051707	GO:BP	response to other organism	18832	14359	GO:0043207, GO:0044419	IEA,IEA,IBA,IDA IMP,IBA IEA,IBA,IBA,IBA IEA,IEP,IDA IMP,IEA,IEA,IEA,IEA,IEA,IEA,IEA,IEA,IBA IEA,IEA,IEA,IEA,IEA,IEA,IEA,IMP IBA,IBA	ENSBTAG00000052478	FALSE	DEFB116
query_1	TRUE	5.64466e-05	1098	152	27	0.177632	0.0245902	GO:0051707	GO:BP	response to other organism	18832	14359	GO:0043207, GO:0044419	IEA,IEA,IBA,IDA IMP,IBA IEA,IBA,IBA,IBA IEA,IEP,IDA IMP,IEA,IEA,IEA,IEA,IEA,IEA,IEA,IEA,IBA IEA,IEA,IEA,IEA,IEA,IEA,IEA,IMP IBA,IBA	ENSBTAG00000048009	FALSE
query_1	TRUE	5.64466e-05	1098	152	27	0.177632	0.0245902	GO:0051707	GO:BP	response to other organism	18832	14359	GO:0043207, GO:0044419	IEA,IEA,IBA,IDA IMP,IBA IEA,IBA,IBA,IBA IEA,IEP,IDA IMP,IEA,IEA,IEA,IEA,IEA,IEA,IEA,IEA,IBA IEA,IEA,IEA,IEA,IEA,IEA,IEA,IMP IBA,IBA	ENSBTAG00000048949	FALSE	DEFB121
query_1	TRUE	5.64466e-05	1098	152	27	0.177632	0.0245902	GO:0051707	GO:BP	response to other organism	18832	14359	GO:0043207, GO:0044419	IEA,IEA,IBA,IDA IMP,IBA IEA,IBA,IBA,IBA IEA,IEP,IDA IMP,IEA,IEA,IEA,IEA,IEA,IEA,IEA,IEA,IBA IEA,IEA,IEA,IEA,IEA,IEA,IEA,IMP IBA,IBA	ENSBTAG00000027384	FALSE	DEFB122A
query_1	TRUE	5.64466e-05	1098	152	27	0.177632	0.0245902	GO:0051707	GO:BP	response to other organism	18832	14359	GO:0043207, GO:0044419	IEA,IEA,IBA,IDA IMP,IBA IEA,IBA,IBA,IBA IEA,IEP,IDA IMP,IEA,IEA,IEA,IEA,IEA,IEA,IEA,IEA,IBA IEA,IEA,IEA,IEA,IEA,IEA,IEA,IMP IBA,IBA	ENSBTAG00000027383	FALSE	DEFB122
query_1	TRUE	5.64466e-05	1098	152	27	0.177632	0.0245902	GO:0051707	GO:BP	response to other organism	18832	14359	GO:0043207, GO:0044419	IEA,IEA,IBA,IDA IMP,IBA IEA,IBA,IBA,IBA IEA,IEP,IDA IMP,IEA,IEA,IEA,IEA,IEA,IEA,IEA,IEA,IBA IEA,IEA,IEA,IEA,IEA,IEA,IEA,IMP IBA,IBA	ENSBTAG00000020555	FALSE	DEFB123
query_1	TRUE	5.64466e-05	1098	152	27	0.177632	0.0245902	GO:0051707	GO:BP	response to other organism	18832	14359	GO:0043207, GO:0044419	IEA,IEA,IBA,IDA IMP,IBA IEA,IBA,IBA,IBA IEA,IEP,IDA IMP,IEA,IEA,IEA,IEA,IEA,IEA,IEA,IEA,IBA IEA,IEA,IEA,IEA,IEA,IEA,IEA,IMP IBA,IBA	ENSBTAG00000063404	FALSE	DEFB124
query_1	TRUE	5.64466e-05	1098	152	27	0.177632	0.0245902	GO:0051707	GO:BP	response to other organism	18832	14359	GO:0043207, GO:0044419	IEA,IEA,IBA,IDA IMP,IBA IEA,IBA,IBA,IBA IEA,IEP,IDA IMP,IEA,IEA,IEA,IEA,IEA,IEA,IEA,IEA,IBA IEA,IEA,IEA,IEA,IEA,IEA,IEA,IMP IBA,IBA	ENSBTAG00000054958	FALSE	DEFB127
query_1	TRUE	5.64466e-05	1098	152	27	0.177632	0.0245902	GO:0051707	GO:BP	response to other organism	18832	14359	GO:0043207, GO:0044419	IEA,IEA,IBA,IDA IMP,IBA IEA,IBA,IBA,IBA IEA,IEP,IDA IMP,IEA,IEA,IEA,IEA,IEA,IEA,IEA,IEA,IBA IEA,IEA,IEA,IEA,IEA,IEA,IEA,IMP IBA,IBA	ENSBTAG00000051033	FALSE
query_1	TRUE	5.64466e-05	1098	152	27	0.177632	0.0245902	GO:0051707	GO:BP	response to other organism	18832	14359	GO:0043207, GO:0044419	IEA,IEA,IBA,IDA IMP,IBA IEA,IBA,IBA,IBA IEA,IEP,IDA IMP,IEA,IEA,IEA,IEA,IEA,IEA,IEA,IEA,IBA IEA,IEA,IEA,IEA,IEA,IEA,IEA,IMP IBA,IBA	ENSBTAG00000053093	FALSE
query_1	TRUE	5.64466e-05	1098	152	27	0.177632	0.0245902	GO:0051707	GO:BP	response to other organism	18832	14359	GO:0043207, GO:0044419	IEA,IEA,IBA,IDA IMP,IBA IEA,IBA,IBA,IBA IEA,IEP,IDA IMP,IEA,IEA,IEA,IEA,IEA,IEA,IEA,IEA,IBA IEA,IEA,IEA,IEA,IEA,IEA,IEA,IMP IBA,IBA	ENSBTAG00000049328	FALSE
query_1	TRUE	5.64466e-05	1098	152	27	0.177632	0.0245902	GO:0051707	GO:BP	response to other organism	18832	14359	GO:0043207, GO:0044419	IEA,IEA,IBA,IDA IMP,IBA IEA,IBA,IBA,IBA IEA,IEP,IDA IMP,IEA,IEA,IEA,IEA,IEA,IEA,IEA,IEA,IBA IEA,IEA,IEA,IEA,IEA,IEA,IEA,IMP IBA,IBA	ENSBTAG00000049491	FALSE	DEFB115
query_1	TRUE	5.64466e-05	1098	152	27	0.177632	0.0245902	GO:0051707	GO:BP	response to other organism	18832	14359	GO:0043207, GO:0044419	IEA,IEA,IBA,IDA IMP,IBA IEA,IBA,IBA,IBA IEA,IEP,IDA IMP,IEA,IEA,IEA,IEA,IEA,IEA,IEA,IEA,IBA IEA,IEA,IEA,IEA,IEA,IEA,IEA,IMP IBA,IBA	ENSBTAG00000050556	FALSE
query_1	TRUE	5.64466e-05	1098	152	27	0.177632	0.0245902	GO:0051707	GO:BP	response to other organism	18832	14359	GO:0043207, GO:0044419	IEA,IEA,IBA,IDA IMP,IBA IEA,IBA,IBA,IBA IEA,IEP,IDA IMP,IEA,IEA,IEA,IEA,IEA,IEA,IEA,IEA,IBA IEA,IEA,IEA,IEA,IEA,IEA,IEA,IMP IBA,IBA	ENSBTAG00000039839	FALSE	IL36RN
query_1	TRUE	5.64466e-05	1098	152	27	0.177632	0.0245902	GO:0051707	GO:BP	response to other organism	18832	14359	GO:0043207, GO:0044419	IEA,IEA,IBA,IDA IMP,IBA IEA,IBA,IBA,IBA IEA,IEP,IDA IMP,IEA,IEA,IEA,IEA,IEA,IEA,IEA,IEA,IBA IEA,IEA,IEA,IEA,IEA,IEA,IEA,IMP IBA,IBA	ENSBTAG00000018012	FALSE	IL1F10
query_1	TRUE	5.64466e-05	1099	152	27	0.177632	0.0245678	GO:0043207	GO:BP	response to external biotic stimulus	18832	10929	GO:0009605, GO:0009607	IEA,IEA,IBA,IDA IMP,IBA IEA,IBA,IBA,IBA IEA,IEP,IDA IMP,IEA,IEA,IEA,IEA,IEA,IEA,IEA,IEA,IBA IEA,IEA,IEA,IEA,IEA,IEA,IEA,IMP IBA,IBA	ENSBTAG00000021841	FALSE	CHD7
query_1	TRUE	5.64466e-05	1099	152	27	0.177632	0.0245678	GO:0043207	GO:BP	response to external biotic stimulus	18832	10929	GO:0009605, GO:0009607	IEA,IEA,IBA,IDA IMP,IBA IEA,IBA,IBA,IBA IEA,IEP,IDA IMP,IEA,IEA,IEA,IEA,IEA,IEA,IEA,IEA,IBA IEA,IEA,IEA,IEA,IEA,IEA,IEA,IMP IBA,IBA	ENSBTAG00000011929	FALSE	USP50
query_1	TRUE	5.64466e-05	1099	152	27	0.177632	0.0245678	GO:0043207	GO:BP	response to external biotic stimulus	18832	10929	GO:0009605, GO:0009607	IEA,IEA,IBA,IDA IMP,IBA IEA,IBA,IBA,IBA IEA,IEP,IDA IMP,IEA,IEA,IEA,IEA,IEA,IEA,IEA,IEA,IBA IEA,IEA,IEA,IEA,IEA,IEA,IEA,IMP IBA,IBA	ENSBTAG00000003326	FALSE	NAIP
query_1	TRUE	5.64466e-05	1099	152	27	0.177632	0.0245678	GO:0043207	GO:BP	response to external biotic stimulus	18832	10929	GO:0009605, GO:0009607	IEA,IEA,IBA,IDA IMP,IBA IEA,IBA,IBA,IBA IEA,IEP,IDA IMP,IEA,IEA,IEA,IEA,IEA,IEA,IEA,IEA,IBA IEA,IEA,IEA,IEA,IEA,IEA,IEA,IMP IBA,IBA	ENSBTAG00000007532	FALSE	TRIM15
query_1	TRUE	5.64466e-05	1099	152	27	0.177632	0.0245678	GO:0043207	GO:BP	response to external biotic stimulus	18832	10929	GO:0009605, GO:0009607	IEA,IEA,IBA,IDA IMP,IBA IEA,IBA,IBA,IBA IEA,IEP,IDA IMP,IEA,IEA,IEA,IEA,IEA,IEA,IEA,IEA,IBA IEA,IEA,IEA,IEA,IEA,IEA,IEA,IMP IBA,IBA	ENSBTAG00000007530	FALSE	TRIM10
query_1	TRUE	5.64466e-05	1099	152	27	0.177632	0.0245678	GO:0043207	GO:BP	response to external biotic stimulus	18832	10929	GO:0009605, GO:0009607	IEA,IEA,IBA,IDA IMP,IBA IEA,IBA,IBA,IBA IEA,IEP,IDA IMP,IEA,IEA,IEA,IEA,IEA,IEA,IEA,IEA,IBA IEA,IEA,IEA,IEA,IEA,IEA,IEA,IMP IBA,IBA	ENSBTAG00000037381	FALSE	TRIM40
query_1	TRUE	5.64466e-05	1099	152	27	0.177632	0.0245678	GO:0043207	GO:BP	response to external biotic stimulus	18832	10929	GO:0009605, GO:0009607	IEA,IEA,IBA,IDA IMP,IBA IEA,IBA,IBA,IBA IEA,IEP,IDA IMP,IEA,IEA,IEA,IEA,IEA,IEA,IEA,IEA,IBA IEA,IEA,IEA,IEA,IEA,IEA,IEA,IMP IBA,IBA	ENSBTAG00000004490	FALSE	TRIM31
query_1	TRUE	5.64466e-05	1099	152	27	0.177632	0.0245678	GO:0043207	GO:BP	response to external biotic stimulus	18832	10929	GO:0009605, GO:0009607	IEA,IEA,IBA,IDA IMP,IBA IEA,IBA,IBA,IBA IEA,IEP,IDA IMP,IEA,IEA,IEA,IEA,IEA,IEA,IEA,IEA,IBA IEA,IEA,IEA,IEA,IEA,IEA,IEA,IMP IBA,IBA	ENSBTAG00000035744	FALSE	TRIM26
query_1	TRUE	5.64466e-05	1099	152	27	0.177632	0.0245678	GO:0043207	GO:BP	response to external biotic stimulus	18832	10929	GO:0009605, GO:0009607	IEA,IEA,IBA,IDA IMP,IBA IEA,IBA,IBA,IBA IEA,IEP,IDA IMP,IEA,IEA,IEA,IEA,IEA,IEA,IEA,IEA,IBA IEA,IEA,IEA,IEA,IEA,IEA,IEA,IMP IBA,IBA	ENSBTAG00000038849	FALSE	TRDN
query_1	TRUE	5.64466e-05	1099	152	27	0.177632	0.0245678	GO:0043207	GO:BP	response to external biotic stimulus	18832	10929	GO:0009605, GO:0009607	IEA,IEA,IBA,IDA IMP,IBA IEA,IBA,IBA,IBA IEA,IEP,IDA IMP,IEA,IEA,IEA,IEA,IEA,IEA,IEA,IEA,IBA IEA,IEA,IEA,IEA,IEA,IEA,IEA,IMP IBA,IBA	ENSBTAG00000005400	FALSE	ATG5
query_1	TRUE	5.64466e-05	1099	152	27	0.177632	0.0245678	GO:0043207	GO:BP	response to external biotic stimulus	18832	10929	GO:0009605, GO:0009607	IEA,IEA,IBA,IDA IMP,IBA IEA,IBA,IBA,IBA IEA,IEP,IDA IMP,IEA,IEA,IEA,IEA,IEA,IEA,IEA,IEA,IBA IEA,IEA,IEA,IEA,IEA,IEA,IEA,IMP IBA,IBA	ENSBTAG00000062774	FALSE	VTCN1
query_1	TRUE	5.64466e-05	1099	152	27	0.177632	0.0245678	GO:0043207	GO:BP	response to external biotic stimulus	18832	10929	GO:0009605, GO:0009607	IEA,IEA,IBA,IDA IMP,IBA IEA,IBA,IBA,IBA IEA,IEP,IDA IMP,IEA,IEA,IEA,IEA,IEA,IEA,IEA,IEA,IBA IEA,IEA,IEA,IEA,IEA,IEA,IEA,IMP IBA,IBA	ENSBTAG00000003364	FALSE	DEFB119
query_1	TRUE	5.64466e-05	1099	152	27	0.177632	0.0245678	GO:0043207	GO:BP	response to external biotic stimulus	18832	10929	GO:0009605, GO:0009607	IEA,IEA,IBA,IDA IMP,IBA IEA,IBA,IBA,IBA IEA,IEP,IDA IMP,IEA,IEA,IEA,IEA,IEA,IEA,IEA,IEA,IBA IEA,IEA,IEA,IEA,IEA,IEA,IEA,IMP IBA,IBA	ENSBTAG00000052478	FALSE	DEFB116
query_1	TRUE	5.64466e-05	1099	152	27	0.177632	0.0245678	GO:0043207	GO:BP	response to external biotic stimulus	18832	10929	GO:0009605, GO:0009607	IEA,IEA,IBA,IDA IMP,IBA IEA,IBA,IBA,IBA IEA,IEP,IDA IMP,IEA,IEA,IEA,IEA,IEA,IEA,IEA,IEA,IBA IEA,IEA,IEA,IEA,IEA,IEA,IEA,IMP IBA,IBA	ENSBTAG00000048009	FALSE
query_1	TRUE	5.64466e-05	1099	152	27	0.177632	0.0245678	GO:0043207	GO:BP	response to external biotic stimulus	18832	10929	GO:0009605, GO:0009607	IEA,IEA,IBA,IDA IMP,IBA IEA,IBA,IBA,IBA IEA,IEP,IDA IMP,IEA,IEA,IEA,IEA,IEA,IEA,IEA,IEA,IBA IEA,IEA,IEA,IEA,IEA,IEA,IEA,IMP IBA,IBA	ENSBTAG00000048949	FALSE	DEFB121
query_1	TRUE	5.64466e-05	1099	152	27	0.177632	0.0245678	GO:0043207	GO:BP	response to external biotic stimulus	18832	10929	GO:0009605, GO:0009607	IEA,IEA,IBA,IDA IMP,IBA IEA,IBA,IBA,IBA IEA,IEP,IDA IMP,IEA,IEA,IEA,IEA,IEA,IEA,IEA,IEA,IBA IEA,IEA,IEA,IEA,IEA,IEA,IEA,IMP IBA,IBA	ENSBTAG00000027384	FALSE	DEFB122A
query_1	TRUE	5.64466e-05	1099	152	27	0.177632	0.0245678	GO:0043207	GO:BP	response to external biotic stimulus	18832	10929	GO:0009605, GO:0009607	IEA,IEA,IBA,IDA IMP,IBA IEA,IBA,IBA,IBA IEA,IEP,IDA IMP,IEA,IEA,IEA,IEA,IEA,IEA,IEA,IEA,IBA IEA,IEA,IEA,IEA,IEA,IEA,IEA,IMP IBA,IBA	ENSBTAG00000027383	FALSE	DEFB122
query_1	TRUE	5.64466e-05	1099	152	27	0.177632	0.0245678	GO:0043207	GO:BP	response to external biotic stimulus	18832	10929	GO:0009605, GO:0009607	IEA,IEA,IBA,IDA IMP,IBA IEA,IBA,IBA,IBA IEA,IEP,IDA IMP,IEA,IEA,IEA,IEA,IEA,IEA,IEA,IEA,IBA IEA,IEA,IEA,IEA,IEA,IEA,IEA,IMP IBA,IBA	ENSBTAG00000020555	FALSE	DEFB123
query_1	TRUE	5.64466e-05	1099	152	27	0.177632	0.0245678	GO:0043207	GO:BP	response to external biotic stimulus	18832	10929	GO:0009605, GO:0009607	IEA,IEA,IBA,IDA IMP,IBA IEA,IBA,IBA,IBA IEA,IEP,IDA IMP,IEA,IEA,IEA,IEA,IEA,IEA,IEA,IEA,IBA IEA,IEA,IEA,IEA,IEA,IEA,IEA,IMP IBA,IBA	ENSBTAG00000063404	FALSE	DEFB124
query_1	TRUE	5.64466e-05	1099	152	27	0.177632	0.0245678	GO:0043207	GO:BP	response to external biotic stimulus	18832	10929	GO:0009605, GO:0009607	IEA,IEA,IBA,IDA IMP,IBA IEA,IBA,IBA,IBA IEA,IEP,IDA IMP,IEA,IEA,IEA,IEA,IEA,IEA,IEA,IEA,IBA IEA,IEA,IEA,IEA,IEA,IEA,IEA,IMP IBA,IBA	ENSBTAG00000054958	FALSE	DEFB127
query_1	TRUE	5.64466e-05	1099	152	27	0.177632	0.0245678	GO:0043207	GO:BP	response to external biotic stimulus	18832	10929	GO:0009605, GO:0009607	IEA,IEA,IBA,IDA IMP,IBA IEA,IBA,IBA,IBA IEA,IEP,IDA IMP,IEA,IEA,IEA,IEA,IEA,IEA,IEA,IEA,IBA IEA,IEA,IEA,IEA,IEA,IEA,IEA,IMP IBA,IBA	ENSBTAG00000051033	FALSE
query_1	TRUE	5.64466e-05	1099	152	27	0.177632	0.0245678	GO:0043207	GO:BP	response to external biotic stimulus	18832	10929	GO:0009605, GO:0009607	IEA,IEA,IBA,IDA IMP,IBA IEA,IBA,IBA,IBA IEA,IEP,IDA IMP,IEA,IEA,IEA,IEA,IEA,IEA,IEA,IEA,IBA IEA,IEA,IEA,IEA,IEA,IEA,IEA,IMP IBA,IBA	ENSBTAG00000053093	FALSE
query_1	TRUE	5.64466e-05	1099	152	27	0.177632	0.0245678	GO:0043207	GO:BP	response to external biotic stimulus	18832	10929	GO:0009605, GO:0009607	IEA,IEA,IBA,IDA IMP,IBA IEA,IBA,IBA,IBA IEA,IEP,IDA IMP,IEA,IEA,IEA,IEA,IEA,IEA,IEA,IEA,IBA IEA,IEA,IEA,IEA,IEA,IEA,IEA,IMP IBA,IBA	ENSBTAG00000049328	FALSE
query_1	TRUE	5.64466e-05	1099	152	27	0.177632	0.0245678	GO:0043207	GO:BP	response to external biotic stimulus	18832	10929	GO:0009605, GO:0009607	IEA,IEA,IBA,IDA IMP,IBA IEA,IBA,IBA,IBA IEA,IEP,IDA IMP,IEA,IEA,IEA,IEA,IEA,IEA,IEA,IEA,IBA IEA,IEA,IEA,IEA,IEA,IEA,IEA,IMP IBA,IBA	ENSBTAG00000049491	FALSE	DEFB115
query_1	TRUE	5.64466e-05	1099	152	27	0.177632	0.0245678	GO:0043207	GO:BP	response to external biotic stimulus	18832	10929	GO:0009605, GO:0009607	IEA,IEA,IBA,IDA IMP,IBA IEA,IBA,IBA,IBA IEA,IEP,IDA IMP,IEA,IEA,IEA,IEA,IEA,IEA,IEA,IEA,IBA IEA,IEA,IEA,IEA,IEA,IEA,IEA,IMP IBA,IBA	ENSBTAG00000050556	FALSE
query_1	TRUE	5.64466e-05	1099	152	27	0.177632	0.0245678	GO:0043207	GO:BP	response to external biotic stimulus	18832	10929	GO:0009605, GO:0009607	IEA,IEA,IBA,IDA IMP,IBA IEA,IBA,IBA,IBA IEA,IEP,IDA IMP,IEA,IEA,IEA,IEA,IEA,IEA,IEA,IEA,IBA IEA,IEA,IEA,IEA,IEA,IEA,IEA,IMP IBA,IBA	ENSBTAG00000039839	FALSE	IL36RN
query_1	TRUE	5.64466e-05	1099	152	27	0.177632	0.0245678	GO:0043207	GO:BP	response to external biotic stimulus	18832	10929	GO:0009605, GO:0009607	IEA,IEA,IBA,IDA IMP,IBA IEA,IBA,IBA,IBA IEA,IEP,IDA IMP,IEA,IEA,IEA,IEA,IEA,IEA,IEA,IEA,IBA IEA,IEA,IEA,IEA,IEA,IEA,IEA,IMP IBA,IBA	ENSBTAG00000018012	FALSE	IL1F10
query_1	TRUE	5.96303e-05	767	152	22	0.144737	0.0286832	GO:0140546	GO:BP	defense response to symbiont	18832	20385	GO:0098542	IEA,IDA IMP,IBA IEA,IBA,IBA,IBA IEA,IDA,IEA,IEA,IEA,IEA,IEA,IEA,IEA,IEA,IEA,IEA,IEA,IEA,IEA,IEA,IMP	ENSBTAG00000011929	FALSE	USP50
query_1	TRUE	5.96303e-05	767	152	22	0.144737	0.0286832	GO:0140546	GO:BP	defense response to symbiont	18832	20385	GO:0098542	IEA,IDA IMP,IBA IEA,IBA,IBA,IBA IEA,IDA,IEA,IEA,IEA,IEA,IEA,IEA,IEA,IEA,IEA,IEA,IEA,IEA,IEA,IEA,IMP	ENSBTAG00000007532	FALSE	TRIM15
query_1	TRUE	5.96303e-05	767	152	22	0.144737	0.0286832	GO:0140546	GO:BP	defense response to symbiont	18832	20385	GO:0098542	IEA,IDA IMP,IBA IEA,IBA,IBA,IBA IEA,IDA,IEA,IEA,IEA,IEA,IEA,IEA,IEA,IEA,IEA,IEA,IEA,IEA,IEA,IEA,IMP	ENSBTAG00000007530	FALSE	TRIM10
query_1	TRUE	5.96303e-05	767	152	22	0.144737	0.0286832	GO:0140546	GO:BP	defense response to symbiont	18832	20385	GO:0098542	IEA,IDA IMP,IBA IEA,IBA,IBA,IBA IEA,IDA,IEA,IEA,IEA,IEA,IEA,IEA,IEA,IEA,IEA,IEA,IEA,IEA,IEA,IEA,IMP	ENSBTAG00000037381	FALSE	TRIM40
query_1	TRUE	5.96303e-05	767	152	22	0.144737	0.0286832	GO:0140546	GO:BP	defense response to symbiont	18832	20385	GO:0098542	IEA,IDA IMP,IBA IEA,IBA,IBA,IBA IEA,IDA,IEA,IEA,IEA,IEA,IEA,IEA,IEA,IEA,IEA,IEA,IEA,IEA,IEA,IEA,IMP	ENSBTAG00000004490	FALSE	TRIM31
query_1	TRUE	5.96303e-05	767	152	22	0.144737	0.0286832	GO:0140546	GO:BP	defense response to symbiont	18832	20385	GO:0098542	IEA,IDA IMP,IBA IEA,IBA,IBA,IBA IEA,IDA,IEA,IEA,IEA,IEA,IEA,IEA,IEA,IEA,IEA,IEA,IEA,IEA,IEA,IEA,IMP	ENSBTAG00000035744	FALSE	TRIM26
query_1	TRUE	5.96303e-05	767	152	22	0.144737	0.0286832	GO:0140546	GO:BP	defense response to symbiont	18832	20385	GO:0098542	IEA,IDA IMP,IBA IEA,IBA,IBA,IBA IEA,IDA,IEA,IEA,IEA,IEA,IEA,IEA,IEA,IEA,IEA,IEA,IEA,IEA,IEA,IEA,IMP	ENSBTAG00000005400	FALSE	ATG5
query_1	TRUE	5.96303e-05	767	152	22	0.144737	0.0286832	GO:0140546	GO:BP	defense response to symbiont	18832	20385	GO:0098542	IEA,IDA IMP,IBA IEA,IBA,IBA,IBA IEA,IDA,IEA,IEA,IEA,IEA,IEA,IEA,IEA,IEA,IEA,IEA,IEA,IEA,IEA,IEA,IMP	ENSBTAG00000003364	FALSE	DEFB119
query_1	TRUE	5.96303e-05	767	152	22	0.144737	0.0286832	GO:0140546	GO:BP	defense response to symbiont	18832	20385	GO:0098542	IEA,IDA IMP,IBA IEA,IBA,IBA,IBA IEA,IDA,IEA,IEA,IEA,IEA,IEA,IEA,IEA,IEA,IEA,IEA,IEA,IEA,IEA,IEA,IMP	ENSBTAG00000052478	FALSE	DEFB116
query_1	TRUE	5.96303e-05	767	152	22	0.144737	0.0286832	GO:0140546	GO:BP	defense response to symbiont	18832	20385	GO:0098542	IEA,IDA IMP,IBA IEA,IBA,IBA,IBA IEA,IDA,IEA,IEA,IEA,IEA,IEA,IEA,IEA,IEA,IEA,IEA,IEA,IEA,IEA,IEA,IMP	ENSBTAG00000048009	FALSE
query_1	TRUE	5.96303e-05	767	152	22	0.144737	0.0286832	GO:0140546	GO:BP	defense response to symbiont	18832	20385	GO:0098542	IEA,IDA IMP,IBA IEA,IBA,IBA,IBA IEA,IDA,IEA,IEA,IEA,IEA,IEA,IEA,IEA,IEA,IEA,IEA,IEA,IEA,IEA,IEA,IMP	ENSBTAG00000048949	FALSE	DEFB121
query_1	TRUE	5.96303e-05	767	152	22	0.144737	0.0286832	GO:0140546	GO:BP	defense response to symbiont	18832	20385	GO:0098542	IEA,IDA IMP,IBA IEA,IBA,IBA,IBA IEA,IDA,IEA,IEA,IEA,IEA,IEA,IEA,IEA,IEA,IEA,IEA,IEA,IEA,IEA,IEA,IMP	ENSBTAG00000027384	FALSE	DEFB122A
query_1	TRUE	5.96303e-05	767	152	22	0.144737	0.0286832	GO:0140546	GO:BP	defense response to symbiont	18832	20385	GO:0098542	IEA,IDA IMP,IBA IEA,IBA,IBA,IBA IEA,IDA,IEA,IEA,IEA,IEA,IEA,IEA,IEA,IEA,IEA,IEA,IEA,IEA,IEA,IEA,IMP	ENSBTAG00000027383	FALSE	DEFB122
query_1	TRUE	5.96303e-05	767	152	22	0.144737	0.0286832	GO:0140546	GO:BP	defense response to symbiont	18832	20385	GO:0098542	IEA,IDA IMP,IBA IEA,IBA,IBA,IBA IEA,IDA,IEA,IEA,IEA,IEA,IEA,IEA,IEA,IEA,IEA,IEA,IEA,IEA,IEA,IEA,IMP	ENSBTAG00000020555	FALSE	DEFB123
query_1	TRUE	5.96303e-05	767	152	22	0.144737	0.0286832	GO:0140546	GO:BP	defense response to symbiont	18832	20385	GO:0098542	IEA,IDA IMP,IBA IEA,IBA,IBA,IBA IEA,IDA,IEA,IEA,IEA,IEA,IEA,IEA,IEA,IEA,IEA,IEA,IEA,IEA,IEA,IEA,IMP	ENSBTAG00000063404	FALSE	DEFB124
query_1	TRUE	5.96303e-05	767	152	22	0.144737	0.0286832	GO:0140546	GO:BP	defense response to symbiont	18832	20385	GO:0098542	IEA,IDA IMP,IBA IEA,IBA,IBA,IBA IEA,IDA,IEA,IEA,IEA,IEA,IEA,IEA,IEA,IEA,IEA,IEA,IEA,IEA,IEA,IEA,IMP	ENSBTAG00000054958	FALSE	DEFB127
query_1	TRUE	5.96303e-05	767	152	22	0.144737	0.0286832	GO:0140546	GO:BP	defense response to symbiont	18832	20385	GO:0098542	IEA,IDA IMP,IBA IEA,IBA,IBA,IBA IEA,IDA,IEA,IEA,IEA,IEA,IEA,IEA,IEA,IEA,IEA,IEA,IEA,IEA,IEA,IEA,IMP	ENSBTAG00000051033	FALSE
query_1	TRUE	5.96303e-05	767	152	22	0.144737	0.0286832	GO:0140546	GO:BP	defense response to symbiont	18832	20385	GO:0098542	IEA,IDA IMP,IBA IEA,IBA,IBA,IBA IEA,IDA,IEA,IEA,IEA,IEA,IEA,IEA,IEA,IEA,IEA,IEA,IEA,IEA,IEA,IEA,IMP	ENSBTAG00000053093	FALSE
query_1	TRUE	5.96303e-05	767	152	22	0.144737	0.0286832	GO:0140546	GO:BP	defense response to symbiont	18832	20385	GO:0098542	IEA,IDA IMP,IBA IEA,IBA,IBA,IBA IEA,IDA,IEA,IEA,IEA,IEA,IEA,IEA,IEA,IEA,IEA,IEA,IEA,IEA,IEA,IEA,IMP	ENSBTAG00000049328	FALSE
query_1	TRUE	5.96303e-05	767	152	22	0.144737	0.0286832	GO:0140546	GO:BP	defense response to symbiont	18832	20385	GO:0098542	IEA,IDA IMP,IBA IEA,IBA,IBA,IBA IEA,IDA,IEA,IEA,IEA,IEA,IEA,IEA,IEA,IEA,IEA,IEA,IEA,IEA,IEA,IEA,IMP	ENSBTAG00000049491	FALSE	DEFB115
query_1	TRUE	5.96303e-05	767	152	22	0.144737	0.0286832	GO:0140546	GO:BP	defense response to symbiont	18832	20385	GO:0098542	IEA,IDA IMP,IBA IEA,IBA,IBA,IBA IEA,IDA,IEA,IEA,IEA,IEA,IEA,IEA,IEA,IEA,IEA,IEA,IEA,IEA,IEA,IEA,IMP	ENSBTAG00000050556	FALSE
query_1	TRUE	5.96303e-05	767	152	22	0.144737	0.0286832	GO:0140546	GO:BP	defense response to symbiont	18832	20385	GO:0098542	IEA,IDA IMP,IBA IEA,IBA,IBA,IBA IEA,IDA,IEA,IEA,IEA,IEA,IEA,IEA,IEA,IEA,IEA,IEA,IEA,IEA,IEA,IEA,IMP	ENSBTAG00000039839	FALSE	IL36RN
query_1	TRUE	0.000101925	1294	152	29	0.190789	0.0224111	GO:0006952	GO:BP	defense response	18832	2614	GO:0006950	IEA,IEA,IBA,IEA,IDA IMP,IBA IEA,IBA,IBA,IBA IEA,IDA,IEA,IEA,IEA,IEA,IEA,IEA,IEA,IEA,IEA,IEA,IEA,IEA,IEA,IEA,IEA,IEA,IMP IBA IEA,IBA IEA,IBA IEA	ENSBTAG00000003684	FALSE	LRFN5
query_1	TRUE	0.000101925	1294	152	29	0.190789	0.0224111	GO:0006952	GO:BP	defense response	18832	2614	GO:0006950	IEA,IEA,IBA,IEA,IDA IMP,IBA IEA,IBA,IBA,IBA IEA,IDA,IEA,IEA,IEA,IEA,IEA,IEA,IEA,IEA,IEA,IEA,IEA,IEA,IEA,IEA,IEA,IEA,IMP IBA IEA,IBA IEA,IBA IEA	ENSBTAG00000011929	FALSE	USP50
query_1	TRUE	0.000101925	1294	152	29	0.190789	0.0224111	GO:0006952	GO:BP	defense response	18832	2614	GO:0006950	IEA,IEA,IBA,IEA,IDA IMP,IBA IEA,IBA,IBA,IBA IEA,IDA,IEA,IEA,IEA,IEA,IEA,IEA,IEA,IEA,IEA,IEA,IEA,IEA,IEA,IEA,IEA,IEA,IMP IBA IEA,IBA IEA,IBA IEA	ENSBTAG00000003326	FALSE	NAIP
query_1	TRUE	0.000101925	1294	152	29	0.190789	0.0224111	GO:0006952	GO:BP	defense response	18832	2614	GO:0006950	IEA,IEA,IBA,IEA,IDA IMP,IBA IEA,IBA,IBA,IBA IEA,IDA,IEA,IEA,IEA,IEA,IEA,IEA,IEA,IEA,IEA,IEA,IEA,IEA,IEA,IEA,IEA,IEA,IMP IBA IEA,IBA IEA,IBA IEA	ENSBTAG00000002699	FALSE	KIT
query_1	TRUE	0.000101925	1294	152	29	0.190789	0.0224111	GO:0006952	GO:BP	defense response	18832	2614	GO:0006950	IEA,IEA,IBA,IEA,IDA IMP,IBA IEA,IBA,IBA,IBA IEA,IDA,IEA,IEA,IEA,IEA,IEA,IEA,IEA,IEA,IEA,IEA,IEA,IEA,IEA,IEA,IEA,IEA,IMP IBA IEA,IBA IEA,IBA IEA	ENSBTAG00000007532	FALSE	TRIM15
query_1	TRUE	0.000101925	1294	152	29	0.190789	0.0224111	GO:0006952	GO:BP	defense response	18832	2614	GO:0006950	IEA,IEA,IBA,IEA,IDA IMP,IBA IEA,IBA,IBA,IBA IEA,IDA,IEA,IEA,IEA,IEA,IEA,IEA,IEA,IEA,IEA,IEA,IEA,IEA,IEA,IEA,IEA,IEA,IMP IBA IEA,IBA IEA,IBA IEA	ENSBTAG00000007530	FALSE	TRIM10
query_1	TRUE	0.000101925	1294	152	29	0.190789	0.0224111	GO:0006952	GO:BP	defense response	18832	2614	GO:0006950	IEA,IEA,IBA,IEA,IDA IMP,IBA IEA,IBA,IBA,IBA IEA,IDA,IEA,IEA,IEA,IEA,IEA,IEA,IEA,IEA,IEA,IEA,IEA,IEA,IEA,IEA,IEA,IEA,IMP IBA IEA,IBA IEA,IBA IEA	ENSBTAG00000037381	FALSE	TRIM40
query_1	TRUE	0.000101925	1294	152	29	0.190789	0.0224111	GO:0006952	GO:BP	defense response	18832	2614	GO:0006950	IEA,IEA,IBA,IEA,IDA IMP,IBA IEA,IBA,IBA,IBA IEA,IDA,IEA,IEA,IEA,IEA,IEA,IEA,IEA,IEA,IEA,IEA,IEA,IEA,IEA,IEA,IEA,IEA,IMP IBA IEA,IBA IEA,IBA IEA	ENSBTAG00000004490	FALSE	TRIM31
query_1	TRUE	0.000101925	1294	152	29	0.190789	0.0224111	GO:0006952	GO:BP	defense response	18832	2614	GO:0006950	IEA,IEA,IBA,IEA,IDA IMP,IBA IEA,IBA,IBA,IBA IEA,IDA,IEA,IEA,IEA,IEA,IEA,IEA,IEA,IEA,IEA,IEA,IEA,IEA,IEA,IEA,IEA,IEA,IMP IBA IEA,IBA IEA,IBA IEA	ENSBTAG00000035744	FALSE	TRIM26
query_1	TRUE	0.000101925	1294	152	29	0.190789	0.0224111	GO:0006952	GO:BP	defense response	18832	2614	GO:0006950	IEA,IEA,IBA,IEA,IDA IMP,IBA IEA,IBA,IBA,IBA IEA,IDA,IEA,IEA,IEA,IEA,IEA,IEA,IEA,IEA,IEA,IEA,IEA,IEA,IEA,IEA,IEA,IEA,IMP IBA IEA,IBA IEA,IBA IEA	ENSBTAG00000005400	FALSE	ATG5
query_1	TRUE	0.000101925	1294	152	29	0.190789	0.0224111	GO:0006952	GO:BP	defense response	18832	2614	GO:0006950	IEA,IEA,IBA,IEA,IDA IMP,IBA IEA,IBA,IBA,IBA IEA,IDA,IEA,IEA,IEA,IEA,IEA,IEA,IEA,IEA,IEA,IEA,IEA,IEA,IEA,IEA,IEA,IEA,IMP IBA IEA,IBA IEA,IBA IEA	ENSBTAG00000003364	FALSE	DEFB119
query_1	TRUE	0.000101925	1294	152	29	0.190789	0.0224111	GO:0006952	GO:BP	defense response	18832	2614	GO:0006950	IEA,IEA,IBA,IEA,IDA IMP,IBA IEA,IBA,IBA,IBA IEA,IDA,IEA,IEA,IEA,IEA,IEA,IEA,IEA,IEA,IEA,IEA,IEA,IEA,IEA,IEA,IEA,IEA,IMP IBA IEA,IBA IEA,IBA IEA	ENSBTAG00000052478	FALSE	DEFB116
query_1	TRUE	0.000101925	1294	152	29	0.190789	0.0224111	GO:0006952	GO:BP	defense response	18832	2614	GO:0006950	IEA,IEA,IBA,IEA,IDA IMP,IBA IEA,IBA,IBA,IBA IEA,IDA,IEA,IEA,IEA,IEA,IEA,IEA,IEA,IEA,IEA,IEA,IEA,IEA,IEA,IEA,IEA,IEA,IMP IBA IEA,IBA IEA,IBA IEA	ENSBTAG00000048009	FALSE
query_1	TRUE	0.000101925	1294	152	29	0.190789	0.0224111	GO:0006952	GO:BP	defense response	18832	2614	GO:0006950	IEA,IEA,IBA,IEA,IDA IMP,IBA IEA,IBA,IBA,IBA IEA,IDA,IEA,IEA,IEA,IEA,IEA,IEA,IEA,IEA,IEA,IEA,IEA,IEA,IEA,IEA,IEA,IEA,IMP IBA IEA,IBA IEA,IBA IEA	ENSBTAG00000048949	FALSE	DEFB121
query_1	TRUE	0.000101925	1294	152	29	0.190789	0.0224111	GO:0006952	GO:BP	defense response	18832	2614	GO:0006950	IEA,IEA,IBA,IEA,IDA IMP,IBA IEA,IBA,IBA,IBA IEA,IDA,IEA,IEA,IEA,IEA,IEA,IEA,IEA,IEA,IEA,IEA,IEA,IEA,IEA,IEA,IEA,IEA,IMP IBA IEA,IBA IEA,IBA IEA	ENSBTAG00000027384	FALSE	DEFB122A
query_1	TRUE	0.000101925	1294	152	29	0.190789	0.0224111	GO:0006952	GO:BP	defense response	18832	2614	GO:0006950	IEA,IEA,IBA,IEA,IDA IMP,IBA IEA,IBA,IBA,IBA IEA,IDA,IEA,IEA,IEA,IEA,IEA,IEA,IEA,IEA,IEA,IEA,IEA,IEA,IEA,IEA,IEA,IEA,IMP IBA IEA,IBA IEA,IBA IEA	ENSBTAG00000027383	FALSE	DEFB122
query_1	TRUE	0.000101925	1294	152	29	0.190789	0.0224111	GO:0006952	GO:BP	defense response	18832	2614	GO:0006950	IEA,IEA,IBA,IEA,IDA IMP,IBA IEA,IBA,IBA,IBA IEA,IDA,IEA,IEA,IEA,IEA,IEA,IEA,IEA,IEA,IEA,IEA,IEA,IEA,IEA,IEA,IEA,IEA,IMP IBA IEA,IBA IEA,IBA IEA	ENSBTAG00000020555	FALSE	DEFB123
query_1	TRUE	0.000101925	1294	152	29	0.190789	0.0224111	GO:0006952	GO:BP	defense response	18832	2614	GO:0006950	IEA,IEA,IBA,IEA,IDA IMP,IBA IEA,IBA,IBA,IBA IEA,IDA,IEA,IEA,IEA,IEA,IEA,IEA,IEA,IEA,IEA,IEA,IEA,IEA,IEA,IEA,IEA,IEA,IMP IBA IEA,IBA IEA,IBA IEA	ENSBTAG00000063404	FALSE	DEFB124
query_1	TRUE	0.000101925	1294	152	29	0.190789	0.0224111	GO:0006952	GO:BP	defense response	18832	2614	GO:0006950	IEA,IEA,IBA,IEA,IDA IMP,IBA IEA,IBA,IBA,IBA IEA,IDA,IEA,IEA,IEA,IEA,IEA,IEA,IEA,IEA,IEA,IEA,IEA,IEA,IEA,IEA,IEA,IEA,IMP IBA IEA,IBA IEA,IBA IEA	ENSBTAG00000054958	FALSE	DEFB127
query_1	TRUE	0.000101925	1294	152	29	0.190789	0.0224111	GO:0006952	GO:BP	defense response	18832	2614	GO:0006950	IEA,IEA,IBA,IEA,IDA IMP,IBA IEA,IBA,IBA,IBA IEA,IDA,IEA,IEA,IEA,IEA,IEA,IEA,IEA,IEA,IEA,IEA,IEA,IEA,IEA,IEA,IEA,IEA,IMP IBA IEA,IBA IEA,IBA IEA	ENSBTAG00000051033	FALSE
query_1	TRUE	0.000101925	1294	152	29	0.190789	0.0224111	GO:0006952	GO:BP	defense response	18832	2614	GO:0006950	IEA,IEA,IBA,IEA,IDA IMP,IBA IEA,IBA,IBA,IBA IEA,IDA,IEA,IEA,IEA,IEA,IEA,IEA,IEA,IEA,IEA,IEA,IEA,IEA,IEA,IEA,IEA,IEA,IMP IBA IEA,IBA IEA,IBA IEA	ENSBTAG00000053093	FALSE
query_1	TRUE	0.000101925	1294	152	29	0.190789	0.0224111	GO:0006952	GO:BP	defense response	18832	2614	GO:0006950	IEA,IEA,IBA,IEA,IDA IMP,IBA IEA,IBA,IBA,IBA IEA,IDA,IEA,IEA,IEA,IEA,IEA,IEA,IEA,IEA,IEA,IEA,IEA,IEA,IEA,IEA,IEA,IEA,IMP IBA IEA,IBA IEA,IBA IEA	ENSBTAG00000049328	FALSE
query_1	TRUE	0.000101925	1294	152	29	0.190789	0.0224111	GO:0006952	GO:BP	defense response	18832	2614	GO:0006950	IEA,IEA,IBA,IEA,IDA IMP,IBA IEA,IBA,IBA,IBA IEA,IDA,IEA,IEA,IEA,IEA,IEA,IEA,IEA,IEA,IEA,IEA,IEA,IEA,IEA,IEA,IEA,IEA,IMP IBA IEA,IBA IEA,IBA IEA	ENSBTAG00000049491	FALSE	DEFB115
query_1	TRUE	0.000101925	1294	152	29	0.190789	0.0224111	GO:0006952	GO:BP	defense response	18832	2614	GO:0006950	IEA,IEA,IBA,IEA,IDA IMP,IBA IEA,IBA,IBA,IBA IEA,IDA,IEA,IEA,IEA,IEA,IEA,IEA,IEA,IEA,IEA,IEA,IEA,IEA,IEA,IEA,IEA,IEA,IMP IBA IEA,IBA IEA,IBA IEA	ENSBTAG00000050556	FALSE
query_1	TRUE	0.000101925	1294	152	29	0.190789	0.0224111	GO:0006952	GO:BP	defense response	18832	2614	GO:0006950	IEA,IEA,IBA,IEA,IDA IMP,IBA IEA,IBA,IBA,IBA IEA,IDA,IEA,IEA,IEA,IEA,IEA,IEA,IEA,IEA,IEA,IEA,IEA,IEA,IEA,IEA,IEA,IEA,IMP IBA IEA,IBA IEA,IBA IEA	ENSBTAG00000060313	FALSE	IL36A
query_1	TRUE	0.000101925	1294	152	29	0.190789	0.0224111	GO:0006952	GO:BP	defense response	18832	2614	GO:0006950	IEA,IEA,IBA,IEA,IDA IMP,IBA IEA,IBA,IBA,IBA IEA,IDA,IEA,IEA,IEA,IEA,IEA,IEA,IEA,IEA,IEA,IEA,IEA,IEA,IEA,IEA,IEA,IEA,IMP IBA IEA,IBA IEA,IBA IEA	ENSBTAG00000059479	FALSE
query_1	TRUE	0.000101925	1294	152	29	0.190789	0.0224111	GO:0006952	GO:BP	defense response	18832	2614	GO:0006950	IEA,IEA,IBA,IEA,IDA IMP,IBA IEA,IBA,IBA,IBA IEA,IDA,IEA,IEA,IEA,IEA,IEA,IEA,IEA,IEA,IEA,IEA,IEA,IEA,IEA,IEA,IEA,IEA,IMP IBA IEA,IBA IEA,IBA IEA	ENSBTAG00000039839	FALSE	IL36RN
query_1	TRUE	0.000101925	1294	152	29	0.190789	0.0224111	GO:0006952	GO:BP	defense response	18832	2614	GO:0006950	IEA,IEA,IBA,IEA,IDA IMP,IBA IEA,IBA,IBA,IBA IEA,IDA,IEA,IEA,IEA,IEA,IEA,IEA,IEA,IEA,IEA,IEA,IEA,IEA,IEA,IEA,IEA,IEA,IMP IBA IEA,IBA IEA,IBA IEA	ENSBTAG00000018012	FALSE	IL1F10
query_1	TRUE	0.000101925	1294	152	29	0.190789	0.0224111	GO:0006952	GO:BP	defense response	18832	2614	GO:0006950	IEA,IEA,IBA,IEA,IDA IMP,IBA IEA,IBA,IBA,IBA IEA,IDA,IEA,IEA,IEA,IEA,IEA,IEA,IEA,IEA,IEA,IEA,IEA,IEA,IEA,IEA,IEA,IEA,IMP IBA IEA,IBA IEA,IBA IEA	ENSBTAG00000019665	FALSE	IL1RN
query_1	TRUE	0.000148033	887	152	23	0.151316	0.0259301	GO:0098542	GO:BP	defense response to other organism	18832	19336	GO:0006952, GO:0051707	IEA,IBA,IDA IMP,IBA IEA,IBA,IBA,IBA IEA,IDA,IEA,IEA,IEA,IEA,IEA,IEA,IEA,IEA,IEA,IEA,IEA,IEA,IEA,IEA,IMP	ENSBTAG00000011929	FALSE	USP50
query_1	TRUE	0.000148033	887	152	23	0.151316	0.0259301	GO:0098542	GO:BP	defense response to other organism	18832	19336	GO:0006952, GO:0051707	IEA,IBA,IDA IMP,IBA IEA,IBA,IBA,IBA IEA,IDA,IEA,IEA,IEA,IEA,IEA,IEA,IEA,IEA,IEA,IEA,IEA,IEA,IEA,IEA,IMP	ENSBTAG00000003326	FALSE	NAIP
query_1	TRUE	0.000148033	887	152	23	0.151316	0.0259301	GO:0098542	GO:BP	defense response to other organism	18832	19336	GO:0006952, GO:0051707	IEA,IBA,IDA IMP,IBA IEA,IBA,IBA,IBA IEA,IDA,IEA,IEA,IEA,IEA,IEA,IEA,IEA,IEA,IEA,IEA,IEA,IEA,IEA,IEA,IMP	ENSBTAG00000007532	FALSE	TRIM15
query_1	TRUE	0.000148033	887	152	23	0.151316	0.0259301	GO:0098542	GO:BP	defense response to other organism	18832	19336	GO:0006952, GO:0051707	IEA,IBA,IDA IMP,IBA IEA,IBA,IBA,IBA IEA,IDA,IEA,IEA,IEA,IEA,IEA,IEA,IEA,IEA,IEA,IEA,IEA,IEA,IEA,IEA,IMP	ENSBTAG00000007530	FALSE	TRIM10
query_1	TRUE	0.000148033	887	152	23	0.151316	0.0259301	GO:0098542	GO:BP	defense response to other organism	18832	19336	GO:0006952, GO:0051707	IEA,IBA,IDA IMP,IBA IEA,IBA,IBA,IBA IEA,IDA,IEA,IEA,IEA,IEA,IEA,IEA,IEA,IEA,IEA,IEA,IEA,IEA,IEA,IEA,IMP	ENSBTAG00000037381	FALSE	TRIM40
query_1	TRUE	0.000148033	887	152	23	0.151316	0.0259301	GO:0098542	GO:BP	defense response to other organism	18832	19336	GO:0006952, GO:0051707	IEA,IBA,IDA IMP,IBA IEA,IBA,IBA,IBA IEA,IDA,IEA,IEA,IEA,IEA,IEA,IEA,IEA,IEA,IEA,IEA,IEA,IEA,IEA,IEA,IMP	ENSBTAG00000004490	FALSE	TRIM31
query_1	TRUE	0.000148033	887	152	23	0.151316	0.0259301	GO:0098542	GO:BP	defense response to other organism	18832	19336	GO:0006952, GO:0051707	IEA,IBA,IDA IMP,IBA IEA,IBA,IBA,IBA IEA,IDA,IEA,IEA,IEA,IEA,IEA,IEA,IEA,IEA,IEA,IEA,IEA,IEA,IEA,IEA,IMP	ENSBTAG00000035744	FALSE	TRIM26
query_1	TRUE	0.000148033	887	152	23	0.151316	0.0259301	GO:0098542	GO:BP	defense response to other organism	18832	19336	GO:0006952, GO:0051707	IEA,IBA,IDA IMP,IBA IEA,IBA,IBA,IBA IEA,IDA,IEA,IEA,IEA,IEA,IEA,IEA,IEA,IEA,IEA,IEA,IEA,IEA,IEA,IEA,IMP	ENSBTAG00000005400	FALSE	ATG5
query_1	TRUE	0.000148033	887	152	23	0.151316	0.0259301	GO:0098542	GO:BP	defense response to other organism	18832	19336	GO:0006952, GO:0051707	IEA,IBA,IDA IMP,IBA IEA,IBA,IBA,IBA IEA,IDA,IEA,IEA,IEA,IEA,IEA,IEA,IEA,IEA,IEA,IEA,IEA,IEA,IEA,IEA,IMP	ENSBTAG00000003364	FALSE	DEFB119
query_1	TRUE	0.000148033	887	152	23	0.151316	0.0259301	GO:0098542	GO:BP	defense response to other organism	18832	19336	GO:0006952, GO:0051707	IEA,IBA,IDA IMP,IBA IEA,IBA,IBA,IBA IEA,IDA,IEA,IEA,IEA,IEA,IEA,IEA,IEA,IEA,IEA,IEA,IEA,IEA,IEA,IEA,IMP	ENSBTAG00000052478	FALSE	DEFB116
query_1	TRUE	0.000148033	887	152	23	0.151316	0.0259301	GO:0098542	GO:BP	defense response to other organism	18832	19336	GO:0006952, GO:0051707	IEA,IBA,IDA IMP,IBA IEA,IBA,IBA,IBA IEA,IDA,IEA,IEA,IEA,IEA,IEA,IEA,IEA,IEA,IEA,IEA,IEA,IEA,IEA,IEA,IMP	ENSBTAG00000048009	FALSE
query_1	TRUE	0.000148033	887	152	23	0.151316	0.0259301	GO:0098542	GO:BP	defense response to other organism	18832	19336	GO:0006952, GO:0051707	IEA,IBA,IDA IMP,IBA IEA,IBA,IBA,IBA IEA,IDA,IEA,IEA,IEA,IEA,IEA,IEA,IEA,IEA,IEA,IEA,IEA,IEA,IEA,IEA,IMP	ENSBTAG00000048949	FALSE	DEFB121
query_1	TRUE	0.000148033	887	152	23	0.151316	0.0259301	GO:0098542	GO:BP	defense response to other organism	18832	19336	GO:0006952, GO:0051707	IEA,IBA,IDA IMP,IBA IEA,IBA,IBA,IBA IEA,IDA,IEA,IEA,IEA,IEA,IEA,IEA,IEA,IEA,IEA,IEA,IEA,IEA,IEA,IEA,IMP	ENSBTAG00000027384	FALSE	DEFB122A
query_1	TRUE	0.000148033	887	152	23	0.151316	0.0259301	GO:0098542	GO:BP	defense response to other organism	18832	19336	GO:0006952, GO:0051707	IEA,IBA,IDA IMP,IBA IEA,IBA,IBA,IBA IEA,IDA,IEA,IEA,IEA,IEA,IEA,IEA,IEA,IEA,IEA,IEA,IEA,IEA,IEA,IEA,IMP	ENSBTAG00000027383	FALSE	DEFB122
query_1	TRUE	0.000148033	887	152	23	0.151316	0.0259301	GO:0098542	GO:BP	defense response to other organism	18832	19336	GO:0006952, GO:0051707	IEA,IBA,IDA IMP,IBA IEA,IBA,IBA,IBA IEA,IDA,IEA,IEA,IEA,IEA,IEA,IEA,IEA,IEA,IEA,IEA,IEA,IEA,IEA,IEA,IMP	ENSBTAG00000020555	FALSE	DEFB123
query_1	TRUE	0.000148033	887	152	23	0.151316	0.0259301	GO:0098542	GO:BP	defense response to other organism	18832	19336	GO:0006952, GO:0051707	IEA,IBA,IDA IMP,IBA IEA,IBA,IBA,IBA IEA,IDA,IEA,IEA,IEA,IEA,IEA,IEA,IEA,IEA,IEA,IEA,IEA,IEA,IEA,IEA,IMP	ENSBTAG00000063404	FALSE	DEFB124
query_1	TRUE	0.000148033	887	152	23	0.151316	0.0259301	GO:0098542	GO:BP	defense response to other organism	18832	19336	GO:0006952, GO:0051707	IEA,IBA,IDA IMP,IBA IEA,IBA,IBA,IBA IEA,IDA,IEA,IEA,IEA,IEA,IEA,IEA,IEA,IEA,IEA,IEA,IEA,IEA,IEA,IEA,IMP	ENSBTAG00000054958	FALSE	DEFB127
query_1	TRUE	0.000148033	887	152	23	0.151316	0.0259301	GO:0098542	GO:BP	defense response to other organism	18832	19336	GO:0006952, GO:0051707	IEA,IBA,IDA IMP,IBA IEA,IBA,IBA,IBA IEA,IDA,IEA,IEA,IEA,IEA,IEA,IEA,IEA,IEA,IEA,IEA,IEA,IEA,IEA,IEA,IMP	ENSBTAG00000051033	FALSE
query_1	TRUE	0.000148033	887	152	23	0.151316	0.0259301	GO:0098542	GO:BP	defense response to other organism	18832	19336	GO:0006952, GO:0051707	IEA,IBA,IDA IMP,IBA IEA,IBA,IBA,IBA IEA,IDA,IEA,IEA,IEA,IEA,IEA,IEA,IEA,IEA,IEA,IEA,IEA,IEA,IEA,IEA,IMP	ENSBTAG00000053093	FALSE
query_1	TRUE	0.000148033	887	152	23	0.151316	0.0259301	GO:0098542	GO:BP	defense response to other organism	18832	19336	GO:0006952, GO:0051707	IEA,IBA,IDA IMP,IBA IEA,IBA,IBA,IBA IEA,IDA,IEA,IEA,IEA,IEA,IEA,IEA,IEA,IEA,IEA,IEA,IEA,IEA,IEA,IEA,IMP	ENSBTAG00000049328	FALSE
query_1	TRUE	0.000148033	887	152	23	0.151316	0.0259301	GO:0098542	GO:BP	defense response to other organism	18832	19336	GO:0006952, GO:0051707	IEA,IBA,IDA IMP,IBA IEA,IBA,IBA,IBA IEA,IDA,IEA,IEA,IEA,IEA,IEA,IEA,IEA,IEA,IEA,IEA,IEA,IEA,IEA,IEA,IMP	ENSBTAG00000049491	FALSE	DEFB115
query_1	TRUE	0.000148033	887	152	23	0.151316	0.0259301	GO:0098542	GO:BP	defense response to other organism	18832	19336	GO:0006952, GO:0051707	IEA,IBA,IDA IMP,IBA IEA,IBA,IBA,IBA IEA,IDA,IEA,IEA,IEA,IEA,IEA,IEA,IEA,IEA,IEA,IEA,IEA,IEA,IEA,IEA,IMP	ENSBTAG00000050556	FALSE
query_1	TRUE	0.000148033	887	152	23	0.151316	0.0259301	GO:0098542	GO:BP	defense response to other organism	18832	19336	GO:0006952, GO:0051707	IEA,IBA,IDA IMP,IBA IEA,IBA,IBA,IBA IEA,IDA,IEA,IEA,IEA,IEA,IEA,IEA,IEA,IEA,IEA,IEA,IEA,IEA,IEA,IEA,IMP	ENSBTAG00000039839	FALSE	IL36RN
query_1	TRUE	0.000297831	1222	152	27	0.177632	0.0220949	GO:0044419	GO:BP	biological process involved in interspecies interaction between organisms	18832	11378	GO:0008150	IEA,IEA,IBA,IDA IMP,IBA IEA,IBA,IBA,IBA IEA,IEP,IDA IMP,IEA,IEA,IEA,IEA,IEA,IEA,IEA,IEA,IBA IEA,IEA,IEA,IEA,IEA,IEA,IEA,IMP IBA,IBA	ENSBTAG00000021841	FALSE	CHD7
query_1	TRUE	0.000297831	1222	152	27	0.177632	0.0220949	GO:0044419	GO:BP	biological process involved in interspecies interaction between organisms	18832	11378	GO:0008150	IEA,IEA,IBA,IDA IMP,IBA IEA,IBA,IBA,IBA IEA,IEP,IDA IMP,IEA,IEA,IEA,IEA,IEA,IEA,IEA,IEA,IBA IEA,IEA,IEA,IEA,IEA,IEA,IEA,IMP IBA,IBA	ENSBTAG00000011929	FALSE	USP50
query_1	TRUE	0.000297831	1222	152	27	0.177632	0.0220949	GO:0044419	GO:BP	biological process involved in interspecies interaction between organisms	18832	11378	GO:0008150	IEA,IEA,IBA,IDA IMP,IBA IEA,IBA,IBA,IBA IEA,IEP,IDA IMP,IEA,IEA,IEA,IEA,IEA,IEA,IEA,IEA,IBA IEA,IEA,IEA,IEA,IEA,IEA,IEA,IMP IBA,IBA	ENSBTAG00000003326	FALSE	NAIP
query_1	TRUE	0.000297831	1222	152	27	0.177632	0.0220949	GO:0044419	GO:BP	biological process involved in interspecies interaction between organisms	18832	11378	GO:0008150	IEA,IEA,IBA,IDA IMP,IBA IEA,IBA,IBA,IBA IEA,IEP,IDA IMP,IEA,IEA,IEA,IEA,IEA,IEA,IEA,IEA,IBA IEA,IEA,IEA,IEA,IEA,IEA,IEA,IMP IBA,IBA	ENSBTAG00000007532	FALSE	TRIM15
query_1	TRUE	0.000297831	1222	152	27	0.177632	0.0220949	GO:0044419	GO:BP	biological process involved in interspecies interaction between organisms	18832	11378	GO:0008150	IEA,IEA,IBA,IDA IMP,IBA IEA,IBA,IBA,IBA IEA,IEP,IDA IMP,IEA,IEA,IEA,IEA,IEA,IEA,IEA,IEA,IBA IEA,IEA,IEA,IEA,IEA,IEA,IEA,IMP IBA,IBA	ENSBTAG00000007530	FALSE	TRIM10
query_1	TRUE	0.000297831	1222	152	27	0.177632	0.0220949	GO:0044419	GO:BP	biological process involved in interspecies interaction between organisms	18832	11378	GO:0008150	IEA,IEA,IBA,IDA IMP,IBA IEA,IBA,IBA,IBA IEA,IEP,IDA IMP,IEA,IEA,IEA,IEA,IEA,IEA,IEA,IEA,IBA IEA,IEA,IEA,IEA,IEA,IEA,IEA,IMP IBA,IBA	ENSBTAG00000037381	FALSE	TRIM40
query_1	TRUE	0.000297831	1222	152	27	0.177632	0.0220949	GO:0044419	GO:BP	biological process involved in interspecies interaction between organisms	18832	11378	GO:0008150	IEA,IEA,IBA,IDA IMP,IBA IEA,IBA,IBA,IBA IEA,IEP,IDA IMP,IEA,IEA,IEA,IEA,IEA,IEA,IEA,IEA,IBA IEA,IEA,IEA,IEA,IEA,IEA,IEA,IMP IBA,IBA	ENSBTAG00000004490	FALSE	TRIM31
query_1	TRUE	0.000297831	1222	152	27	0.177632	0.0220949	GO:0044419	GO:BP	biological process involved in interspecies interaction between organisms	18832	11378	GO:0008150	IEA,IEA,IBA,IDA IMP,IBA IEA,IBA,IBA,IBA IEA,IEP,IDA IMP,IEA,IEA,IEA,IEA,IEA,IEA,IEA,IEA,IBA IEA,IEA,IEA,IEA,IEA,IEA,IEA,IMP IBA,IBA	ENSBTAG00000035744	FALSE	TRIM26
query_1	TRUE	0.000297831	1222	152	27	0.177632	0.0220949	GO:0044419	GO:BP	biological process involved in interspecies interaction between organisms	18832	11378	GO:0008150	IEA,IEA,IBA,IDA IMP,IBA IEA,IBA,IBA,IBA IEA,IEP,IDA IMP,IEA,IEA,IEA,IEA,IEA,IEA,IEA,IEA,IBA IEA,IEA,IEA,IEA,IEA,IEA,IEA,IMP IBA,IBA	ENSBTAG00000038849	FALSE	TRDN
query_1	TRUE	0.000297831	1222	152	27	0.177632	0.0220949	GO:0044419	GO:BP	biological process involved in interspecies interaction between organisms	18832	11378	GO:0008150	IEA,IEA,IBA,IDA IMP,IBA IEA,IBA,IBA,IBA IEA,IEP,IDA IMP,IEA,IEA,IEA,IEA,IEA,IEA,IEA,IEA,IBA IEA,IEA,IEA,IEA,IEA,IEA,IEA,IMP IBA,IBA	ENSBTAG00000005400	FALSE	ATG5
query_1	TRUE	0.000297831	1222	152	27	0.177632	0.0220949	GO:0044419	GO:BP	biological process involved in interspecies interaction between organisms	18832	11378	GO:0008150	IEA,IEA,IBA,IDA IMP,IBA IEA,IBA,IBA,IBA IEA,IEP,IDA IMP,IEA,IEA,IEA,IEA,IEA,IEA,IEA,IEA,IBA IEA,IEA,IEA,IEA,IEA,IEA,IEA,IMP IBA,IBA	ENSBTAG00000062774	FALSE	VTCN1
query_1	TRUE	0.000297831	1222	152	27	0.177632	0.0220949	GO:0044419	GO:BP	biological process involved in interspecies interaction between organisms	18832	11378	GO:0008150	IEA,IEA,IBA,IDA IMP,IBA IEA,IBA,IBA,IBA IEA,IEP,IDA IMP,IEA,IEA,IEA,IEA,IEA,IEA,IEA,IEA,IBA IEA,IEA,IEA,IEA,IEA,IEA,IEA,IMP IBA,IBA	ENSBTAG00000003364	FALSE	DEFB119
query_1	TRUE	0.000297831	1222	152	27	0.177632	0.0220949	GO:0044419	GO:BP	biological process involved in interspecies interaction between organisms	18832	11378	GO:0008150	IEA,IEA,IBA,IDA IMP,IBA IEA,IBA,IBA,IBA IEA,IEP,IDA IMP,IEA,IEA,IEA,IEA,IEA,IEA,IEA,IEA,IBA IEA,IEA,IEA,IEA,IEA,IEA,IEA,IMP IBA,IBA	ENSBTAG00000052478	FALSE	DEFB116
query_1	TRUE	0.000297831	1222	152	27	0.177632	0.0220949	GO:0044419	GO:BP	biological process involved in interspecies interaction between organisms	18832	11378	GO:0008150	IEA,IEA,IBA,IDA IMP,IBA IEA,IBA,IBA,IBA IEA,IEP,IDA IMP,IEA,IEA,IEA,IEA,IEA,IEA,IEA,IEA,IBA IEA,IEA,IEA,IEA,IEA,IEA,IEA,IMP IBA,IBA	ENSBTAG00000048009	FALSE
query_1	TRUE	0.000297831	1222	152	27	0.177632	0.0220949	GO:0044419	GO:BP	biological process involved in interspecies interaction between organisms	18832	11378	GO:0008150	IEA,IEA,IBA,IDA IMP,IBA IEA,IBA,IBA,IBA IEA,IEP,IDA IMP,IEA,IEA,IEA,IEA,IEA,IEA,IEA,IEA,IBA IEA,IEA,IEA,IEA,IEA,IEA,IEA,IMP IBA,IBA	ENSBTAG00000048949	FALSE	DEFB121
query_1	TRUE	0.000297831	1222	152	27	0.177632	0.0220949	GO:0044419	GO:BP	biological process involved in interspecies interaction between organisms	18832	11378	GO:0008150	IEA,IEA,IBA,IDA IMP,IBA IEA,IBA,IBA,IBA IEA,IEP,IDA IMP,IEA,IEA,IEA,IEA,IEA,IEA,IEA,IEA,IBA IEA,IEA,IEA,IEA,IEA,IEA,IEA,IMP IBA,IBA	ENSBTAG00000027384	FALSE	DEFB122A
query_1	TRUE	0.000297831	1222	152	27	0.177632	0.0220949	GO:0044419	GO:BP	biological process involved in interspecies interaction between organisms	18832	11378	GO:0008150	IEA,IEA,IBA,IDA IMP,IBA IEA,IBA,IBA,IBA IEA,IEP,IDA IMP,IEA,IEA,IEA,IEA,IEA,IEA,IEA,IEA,IBA IEA,IEA,IEA,IEA,IEA,IEA,IEA,IMP IBA,IBA	ENSBTAG00000027383	FALSE	DEFB122
query_1	TRUE	0.000297831	1222	152	27	0.177632	0.0220949	GO:0044419	GO:BP	biological process involved in interspecies interaction between organisms	18832	11378	GO:0008150	IEA,IEA,IBA,IDA IMP,IBA IEA,IBA,IBA,IBA IEA,IEP,IDA IMP,IEA,IEA,IEA,IEA,IEA,IEA,IEA,IEA,IBA IEA,IEA,IEA,IEA,IEA,IEA,IEA,IMP IBA,IBA	ENSBTAG00000020555	FALSE	DEFB123
query_1	TRUE	0.000297831	1222	152	27	0.177632	0.0220949	GO:0044419	GO:BP	biological process involved in interspecies interaction between organisms	18832	11378	GO:0008150	IEA,IEA,IBA,IDA IMP,IBA IEA,IBA,IBA,IBA IEA,IEP,IDA IMP,IEA,IEA,IEA,IEA,IEA,IEA,IEA,IEA,IBA IEA,IEA,IEA,IEA,IEA,IEA,IEA,IMP IBA,IBA	ENSBTAG00000063404	FALSE	DEFB124
query_1	TRUE	0.000297831	1222	152	27	0.177632	0.0220949	GO:0044419	GO:BP	biological process involved in interspecies interaction between organisms	18832	11378	GO:0008150	IEA,IEA,IBA,IDA IMP,IBA IEA,IBA,IBA,IBA IEA,IEP,IDA IMP,IEA,IEA,IEA,IEA,IEA,IEA,IEA,IEA,IBA IEA,IEA,IEA,IEA,IEA,IEA,IEA,IMP IBA,IBA	ENSBTAG00000054958	FALSE	DEFB127
query_1	TRUE	0.000297831	1222	152	27	0.177632	0.0220949	GO:0044419	GO:BP	biological process involved in interspecies interaction between organisms	18832	11378	GO:0008150	IEA,IEA,IBA,IDA IMP,IBA IEA,IBA,IBA,IBA IEA,IEP,IDA IMP,IEA,IEA,IEA,IEA,IEA,IEA,IEA,IEA,IBA IEA,IEA,IEA,IEA,IEA,IEA,IEA,IMP IBA,IBA	ENSBTAG00000051033	FALSE
query_1	TRUE	0.000297831	1222	152	27	0.177632	0.0220949	GO:0044419	GO:BP	biological process involved in interspecies interaction between organisms	18832	11378	GO:0008150	IEA,IEA,IBA,IDA IMP,IBA IEA,IBA,IBA,IBA IEA,IEP,IDA IMP,IEA,IEA,IEA,IEA,IEA,IEA,IEA,IEA,IBA IEA,IEA,IEA,IEA,IEA,IEA,IEA,IMP IBA,IBA	ENSBTAG00000053093	FALSE
query_1	TRUE	0.000297831	1222	152	27	0.177632	0.0220949	GO:0044419	GO:BP	biological process involved in interspecies interaction between organisms	18832	11378	GO:0008150	IEA,IEA,IBA,IDA IMP,IBA IEA,IBA,IBA,IBA IEA,IEP,IDA IMP,IEA,IEA,IEA,IEA,IEA,IEA,IEA,IEA,IBA IEA,IEA,IEA,IEA,IEA,IEA,IEA,IMP IBA,IBA	ENSBTAG00000049328	FALSE
query_1	TRUE	0.000297831	1222	152	27	0.177632	0.0220949	GO:0044419	GO:BP	biological process involved in interspecies interaction between organisms	18832	11378	GO:0008150	IEA,IEA,IBA,IDA IMP,IBA IEA,IBA,IBA,IBA IEA,IEP,IDA IMP,IEA,IEA,IEA,IEA,IEA,IEA,IEA,IEA,IBA IEA,IEA,IEA,IEA,IEA,IEA,IEA,IMP IBA,IBA	ENSBTAG00000049491	FALSE	DEFB115
query_1	TRUE	0.000297831	1222	152	27	0.177632	0.0220949	GO:0044419	GO:BP	biological process involved in interspecies interaction between organisms	18832	11378	GO:0008150	IEA,IEA,IBA,IDA IMP,IBA IEA,IBA,IBA,IBA IEA,IEP,IDA IMP,IEA,IEA,IEA,IEA,IEA,IEA,IEA,IEA,IBA IEA,IEA,IEA,IEA,IEA,IEA,IEA,IMP IBA,IBA	ENSBTAG00000050556	FALSE
query_1	TRUE	0.000297831	1222	152	27	0.177632	0.0220949	GO:0044419	GO:BP	biological process involved in interspecies interaction between organisms	18832	11378	GO:0008150	IEA,IEA,IBA,IDA IMP,IBA IEA,IBA,IBA,IBA IEA,IEP,IDA IMP,IEA,IEA,IEA,IEA,IEA,IEA,IEA,IEA,IBA IEA,IEA,IEA,IEA,IEA,IEA,IEA,IMP IBA,IBA	ENSBTAG00000039839	FALSE	IL36RN
query_1	TRUE	0.000297831	1222	152	27	0.177632	0.0220949	GO:0044419	GO:BP	biological process involved in interspecies interaction between organisms	18832	11378	GO:0008150	IEA,IEA,IBA,IDA IMP,IBA IEA,IBA,IBA,IBA IEA,IEP,IDA IMP,IEA,IEA,IEA,IEA,IEA,IEA,IEA,IEA,IBA IEA,IEA,IEA,IEA,IEA,IEA,IEA,IMP IBA,IBA	ENSBTAG00000018012	FALSE	IL1F10
query_1	TRUE	0.00191442	1946	152	34	0.223684	0.0174717	GO:0009605	GO:BP	response to external stimulus	18832	3570	GO:0050896	IEA,IEA,IEA,IBA,ISS IBA IEA,IEA,IEA,IDA IMP,IBA IEA,IBA,IBA,IBA IEA,IEP,IDA IMP IBA,IEA,IEA,IEA,IEA,IEA,IEA,IEA,IEA,IBA IEA,IEA,IEA,IEA,IEA,IEA,IEA,IBA IEA,IDA IGI,IEA,IMP IBA,IBA	ENSBTAG00000021841	FALSE	CHD7
query_1	TRUE	0.00191442	1946	152	34	0.223684	0.0174717	GO:0009605	GO:BP	response to external stimulus	18832	3570	GO:0050896	IEA,IEA,IEA,IBA,ISS IBA IEA,IEA,IEA,IDA IMP,IBA IEA,IBA,IBA,IBA IEA,IEP,IDA IMP IBA,IEA,IEA,IEA,IEA,IEA,IEA,IEA,IEA,IBA IEA,IEA,IEA,IEA,IEA,IEA,IEA,IBA IEA,IDA IGI,IEA,IMP IBA,IBA	ENSBTAG00000003684	FALSE	LRFN5
query_1	TRUE	0.00191442	1946	152	34	0.223684	0.0174717	GO:0009605	GO:BP	response to external stimulus	18832	3570	GO:0050896	IEA,IEA,IEA,IBA,ISS IBA IEA,IEA,IEA,IDA IMP,IBA IEA,IBA,IBA,IBA IEA,IEP,IDA IMP IBA,IEA,IEA,IEA,IEA,IEA,IEA,IEA,IEA,IBA IEA,IEA,IEA,IEA,IEA,IEA,IEA,IBA IEA,IDA IGI,IEA,IMP IBA,IBA	ENSBTAG00000011929	FALSE	USP50
query_1	TRUE	0.00191442	1946	152	34	0.223684	0.0174717	GO:0009605	GO:BP	response to external stimulus	18832	3570	GO:0050896	IEA,IEA,IEA,IBA,ISS IBA IEA,IEA,IEA,IDA IMP,IBA IEA,IBA,IBA,IBA IEA,IEP,IDA IMP IBA,IEA,IEA,IEA,IEA,IEA,IEA,IEA,IEA,IBA IEA,IEA,IEA,IEA,IEA,IEA,IEA,IBA IEA,IDA IGI,IEA,IMP IBA,IBA	ENSBTAG00000003326	FALSE	NAIP
query_1	TRUE	0.00191442	1946	152	34	0.223684	0.0174717	GO:0009605	GO:BP	response to external stimulus	18832	3570	GO:0050896	IEA,IEA,IEA,IBA,ISS IBA IEA,IEA,IEA,IDA IMP,IBA IEA,IBA,IBA,IBA IEA,IEP,IDA IMP IBA,IEA,IEA,IEA,IEA,IEA,IEA,IEA,IEA,IBA IEA,IEA,IEA,IEA,IEA,IEA,IEA,IBA IEA,IDA IGI,IEA,IMP IBA,IBA	ENSBTAG00000047486	FALSE	CARTPT
query_1	TRUE	0.00191442	1946	152	34	0.223684	0.0174717	GO:0009605	GO:BP	response to external stimulus	18832	3570	GO:0050896	IEA,IEA,IEA,IBA,ISS IBA IEA,IEA,IEA,IDA IMP,IBA IEA,IBA,IBA,IBA IEA,IEP,IDA IMP IBA,IEA,IEA,IEA,IEA,IEA,IEA,IEA,IEA,IBA IEA,IEA,IEA,IEA,IEA,IEA,IEA,IBA IEA,IDA IGI,IEA,IMP IBA,IBA	ENSBTAG00000007173	FALSE	PDGFRA
query_1	TRUE	0.00191442	1946	152	34	0.223684	0.0174717	GO:0009605	GO:BP	response to external stimulus	18832	3570	GO:0050896	IEA,IEA,IEA,IBA,ISS IBA IEA,IEA,IEA,IDA IMP,IBA IEA,IBA,IBA,IBA IEA,IEP,IDA IMP IBA,IEA,IEA,IEA,IEA,IEA,IEA,IEA,IEA,IBA IEA,IEA,IEA,IEA,IEA,IEA,IEA,IBA IEA,IDA IGI,IEA,IMP IBA,IBA	ENSBTAG00000002699	FALSE	KIT
query_1	TRUE	0.00191442	1946	152	34	0.223684	0.0174717	GO:0009605	GO:BP	response to external stimulus	18832	3570	GO:0050896	IEA,IEA,IEA,IBA,ISS IBA IEA,IEA,IEA,IDA IMP,IBA IEA,IBA,IBA,IBA IEA,IEP,IDA IMP IBA,IEA,IEA,IEA,IEA,IEA,IEA,IEA,IEA,IBA IEA,IEA,IEA,IEA,IEA,IEA,IEA,IBA IEA,IDA IGI,IEA,IMP IBA,IBA	ENSBTAG00000007532	FALSE	TRIM15
query_1	TRUE	0.00191442	1946	152	34	0.223684	0.0174717	GO:0009605	GO:BP	response to external stimulus	18832	3570	GO:0050896	IEA,IEA,IEA,IBA,ISS IBA IEA,IEA,IEA,IDA IMP,IBA IEA,IBA,IBA,IBA IEA,IEP,IDA IMP IBA,IEA,IEA,IEA,IEA,IEA,IEA,IEA,IEA,IBA IEA,IEA,IEA,IEA,IEA,IEA,IEA,IBA IEA,IDA IGI,IEA,IMP IBA,IBA	ENSBTAG00000007530	FALSE	TRIM10
query_1	TRUE	0.00191442	1946	152	34	0.223684	0.0174717	GO:0009605	GO:BP	response to external stimulus	18832	3570	GO:0050896	IEA,IEA,IEA,IBA,ISS IBA IEA,IEA,IEA,IDA IMP,IBA IEA,IBA,IBA,IBA IEA,IEP,IDA IMP IBA,IEA,IEA,IEA,IEA,IEA,IEA,IEA,IEA,IBA IEA,IEA,IEA,IEA,IEA,IEA,IEA,IBA IEA,IDA IGI,IEA,IMP IBA,IBA	ENSBTAG00000037381	FALSE	TRIM40
query_1	TRUE	0.00191442	1946	152	34	0.223684	0.0174717	GO:0009605	GO:BP	response to external stimulus	18832	3570	GO:0050896	IEA,IEA,IEA,IBA,ISS IBA IEA,IEA,IEA,IDA IMP,IBA IEA,IBA,IBA,IBA IEA,IEP,IDA IMP IBA,IEA,IEA,IEA,IEA,IEA,IEA,IEA,IEA,IBA IEA,IEA,IEA,IEA,IEA,IEA,IEA,IBA IEA,IDA IGI,IEA,IMP IBA,IBA	ENSBTAG00000004490	FALSE	TRIM31
query_1	TRUE	0.00191442	1946	152	34	0.223684	0.0174717	GO:0009605	GO:BP	response to external stimulus	18832	3570	GO:0050896	IEA,IEA,IEA,IBA,ISS IBA IEA,IEA,IEA,IDA IMP,IBA IEA,IBA,IBA,IBA IEA,IEP,IDA IMP IBA,IEA,IEA,IEA,IEA,IEA,IEA,IEA,IEA,IBA IEA,IEA,IEA,IEA,IEA,IEA,IEA,IBA IEA,IDA IGI,IEA,IMP IBA,IBA	ENSBTAG00000035744	FALSE	TRIM26
query_1	TRUE	0.00191442	1946	152	34	0.223684	0.0174717	GO:0009605	GO:BP	response to external stimulus	18832	3570	GO:0050896	IEA,IEA,IEA,IBA,ISS IBA IEA,IEA,IEA,IDA IMP,IBA IEA,IBA,IBA,IBA IEA,IEP,IDA IMP IBA,IEA,IEA,IEA,IEA,IEA,IEA,IEA,IEA,IBA IEA,IEA,IEA,IEA,IEA,IEA,IEA,IBA IEA,IDA IGI,IEA,IMP IBA,IBA	ENSBTAG00000038849	FALSE	TRDN
query_1	TRUE	0.00191442	1946	152	34	0.223684	0.0174717	GO:0009605	GO:BP	response to external stimulus	18832	3570	GO:0050896	IEA,IEA,IEA,IBA,ISS IBA IEA,IEA,IEA,IDA IMP,IBA IEA,IBA,IBA,IBA IEA,IEP,IDA IMP IBA,IEA,IEA,IEA,IEA,IEA,IEA,IEA,IEA,IBA IEA,IEA,IEA,IEA,IEA,IEA,IEA,IBA IEA,IDA IGI,IEA,IMP IBA,IBA	ENSBTAG00000005400	FALSE	ATG5
query_1	TRUE	0.00191442	1946	152	34	0.223684	0.0174717	GO:0009605	GO:BP	response to external stimulus	18832	3570	GO:0050896	IEA,IEA,IEA,IBA,ISS IBA IEA,IEA,IEA,IDA IMP,IBA IEA,IBA,IBA,IBA IEA,IEP,IDA IMP IBA,IEA,IEA,IEA,IEA,IEA,IEA,IEA,IEA,IBA IEA,IEA,IEA,IEA,IEA,IEA,IEA,IBA IEA,IDA IGI,IEA,IMP IBA,IBA	ENSBTAG00000062774	FALSE	VTCN1
query_1	TRUE	0.00191442	1946	152	34	0.223684	0.0174717	GO:0009605	GO:BP	response to external stimulus	18832	3570	GO:0050896	IEA,IEA,IEA,IBA,ISS IBA IEA,IEA,IEA,IDA IMP,IBA IEA,IBA,IBA,IBA IEA,IEP,IDA IMP IBA,IEA,IEA,IEA,IEA,IEA,IEA,IEA,IEA,IBA IEA,IEA,IEA,IEA,IEA,IEA,IEA,IBA IEA,IDA IGI,IEA,IMP IBA,IBA	ENSBTAG00000003364	FALSE	DEFB119
query_1	TRUE	0.00191442	1946	152	34	0.223684	0.0174717	GO:0009605	GO:BP	response to external stimulus	18832	3570	GO:0050896	IEA,IEA,IEA,IBA,ISS IBA IEA,IEA,IEA,IDA IMP,IBA IEA,IBA,IBA,IBA IEA,IEP,IDA IMP IBA,IEA,IEA,IEA,IEA,IEA,IEA,IEA,IEA,IBA IEA,IEA,IEA,IEA,IEA,IEA,IEA,IBA IEA,IDA IGI,IEA,IMP IBA,IBA	ENSBTAG00000052478	FALSE	DEFB116
query_1	TRUE	0.00191442	1946	152	34	0.223684	0.0174717	GO:0009605	GO:BP	response to external stimulus	18832	3570	GO:0050896	IEA,IEA,IEA,IBA,ISS IBA IEA,IEA,IEA,IDA IMP,IBA IEA,IBA,IBA,IBA IEA,IEP,IDA IMP IBA,IEA,IEA,IEA,IEA,IEA,IEA,IEA,IEA,IBA IEA,IEA,IEA,IEA,IEA,IEA,IEA,IBA IEA,IDA IGI,IEA,IMP IBA,IBA	ENSBTAG00000048009	FALSE
query_1	TRUE	0.00191442	1946	152	34	0.223684	0.0174717	GO:0009605	GO:BP	response to external stimulus	18832	3570	GO:0050896	IEA,IEA,IEA,IBA,ISS IBA IEA,IEA,IEA,IDA IMP,IBA IEA,IBA,IBA,IBA IEA,IEP,IDA IMP IBA,IEA,IEA,IEA,IEA,IEA,IEA,IEA,IEA,IBA IEA,IEA,IEA,IEA,IEA,IEA,IEA,IBA IEA,IDA IGI,IEA,IMP IBA,IBA	ENSBTAG00000048949	FALSE	DEFB121
query_1	TRUE	0.00191442	1946	152	34	0.223684	0.0174717	GO:0009605	GO:BP	response to external stimulus	18832	3570	GO:0050896	IEA,IEA,IEA,IBA,ISS IBA IEA,IEA,IEA,IDA IMP,IBA IEA,IBA,IBA,IBA IEA,IEP,IDA IMP IBA,IEA,IEA,IEA,IEA,IEA,IEA,IEA,IEA,IBA IEA,IEA,IEA,IEA,IEA,IEA,IEA,IBA IEA,IDA IGI,IEA,IMP IBA,IBA	ENSBTAG00000027384	FALSE	DEFB122A
query_1	TRUE	0.00191442	1946	152	34	0.223684	0.0174717	GO:0009605	GO:BP	response to external stimulus	18832	3570	GO:0050896	IEA,IEA,IEA,IBA,ISS IBA IEA,IEA,IEA,IDA IMP,IBA IEA,IBA,IBA,IBA IEA,IEP,IDA IMP IBA,IEA,IEA,IEA,IEA,IEA,IEA,IEA,IEA,IBA IEA,IEA,IEA,IEA,IEA,IEA,IEA,IBA IEA,IDA IGI,IEA,IMP IBA,IBA	ENSBTAG00000027383	FALSE	DEFB122
query_1	TRUE	0.00191442	1946	152	34	0.223684	0.0174717	GO:0009605	GO:BP	response to external stimulus	18832	3570	GO:0050896	IEA,IEA,IEA,IBA,ISS IBA IEA,IEA,IEA,IDA IMP,IBA IEA,IBA,IBA,IBA IEA,IEP,IDA IMP IBA,IEA,IEA,IEA,IEA,IEA,IEA,IEA,IEA,IBA IEA,IEA,IEA,IEA,IEA,IEA,IEA,IBA IEA,IDA IGI,IEA,IMP IBA,IBA	ENSBTAG00000020555	FALSE	DEFB123
query_1	TRUE	0.00191442	1946	152	34	0.223684	0.0174717	GO:0009605	GO:BP	response to external stimulus	18832	3570	GO:0050896	IEA,IEA,IEA,IBA,ISS IBA IEA,IEA,IEA,IDA IMP,IBA IEA,IBA,IBA,IBA IEA,IEP,IDA IMP IBA,IEA,IEA,IEA,IEA,IEA,IEA,IEA,IEA,IBA IEA,IEA,IEA,IEA,IEA,IEA,IEA,IBA IEA,IDA IGI,IEA,IMP IBA,IBA	ENSBTAG00000063404	FALSE	DEFB124
query_1	TRUE	0.00191442	1946	152	34	0.223684	0.0174717	GO:0009605	GO:BP	response to external stimulus	18832	3570	GO:0050896	IEA,IEA,IEA,IBA,ISS IBA IEA,IEA,IEA,IDA IMP,IBA IEA,IBA,IBA,IBA IEA,IEP,IDA IMP IBA,IEA,IEA,IEA,IEA,IEA,IEA,IEA,IEA,IBA IEA,IEA,IEA,IEA,IEA,IEA,IEA,IBA IEA,IDA IGI,IEA,IMP IBA,IBA	ENSBTAG00000054958	FALSE	DEFB127
query_1	TRUE	0.00191442	1946	152	34	0.223684	0.0174717	GO:0009605	GO:BP	response to external stimulus	18832	3570	GO:0050896	IEA,IEA,IEA,IBA,ISS IBA IEA,IEA,IEA,IDA IMP,IBA IEA,IBA,IBA,IBA IEA,IEP,IDA IMP IBA,IEA,IEA,IEA,IEA,IEA,IEA,IEA,IEA,IBA IEA,IEA,IEA,IEA,IEA,IEA,IEA,IBA IEA,IDA IGI,IEA,IMP IBA,IBA	ENSBTAG00000051033	FALSE
query_1	TRUE	0.00191442	1946	152	34	0.223684	0.0174717	GO:0009605	GO:BP	response to external stimulus	18832	3570	GO:0050896	IEA,IEA,IEA,IBA,ISS IBA IEA,IEA,IEA,IDA IMP,IBA IEA,IBA,IBA,IBA IEA,IEP,IDA IMP IBA,IEA,IEA,IEA,IEA,IEA,IEA,IEA,IEA,IBA IEA,IEA,IEA,IEA,IEA,IEA,IEA,IBA IEA,IDA IGI,IEA,IMP IBA,IBA	ENSBTAG00000053093	FALSE
query_1	TRUE	0.00191442	1946	152	34	0.223684	0.0174717	GO:0009605	GO:BP	response to external stimulus	18832	3570	GO:0050896	IEA,IEA,IEA,IBA,ISS IBA IEA,IEA,IEA,IDA IMP,IBA IEA,IBA,IBA,IBA IEA,IEP,IDA IMP IBA,IEA,IEA,IEA,IEA,IEA,IEA,IEA,IEA,IBA IEA,IEA,IEA,IEA,IEA,IEA,IEA,IBA IEA,IDA IGI,IEA,IMP IBA,IBA	ENSBTAG00000049328	FALSE
query_1	TRUE	0.00191442	1946	152	34	0.223684	0.0174717	GO:0009605	GO:BP	response to external stimulus	18832	3570	GO:0050896	IEA,IEA,IEA,IBA,ISS IBA IEA,IEA,IEA,IDA IMP,IBA IEA,IBA,IBA,IBA IEA,IEP,IDA IMP IBA,IEA,IEA,IEA,IEA,IEA,IEA,IEA,IEA,IBA IEA,IEA,IEA,IEA,IEA,IEA,IEA,IBA IEA,IDA IGI,IEA,IMP IBA,IBA	ENSBTAG00000049491	FALSE	DEFB115
query_1	TRUE	0.00191442	1946	152	34	0.223684	0.0174717	GO:0009605	GO:BP	response to external stimulus	18832	3570	GO:0050896	IEA,IEA,IEA,IBA,ISS IBA IEA,IEA,IEA,IDA IMP,IBA IEA,IBA,IBA,IBA IEA,IEP,IDA IMP IBA,IEA,IEA,IEA,IEA,IEA,IEA,IEA,IEA,IBA IEA,IEA,IEA,IEA,IEA,IEA,IEA,IBA IEA,IDA IGI,IEA,IMP IBA,IBA	ENSBTAG00000050556	FALSE
query_1	TRUE	0.00191442	1946	152	34	0.223684	0.0174717	GO:0009605	GO:BP	response to external stimulus	18832	3570	GO:0050896	IEA,IEA,IEA,IBA,ISS IBA IEA,IEA,IEA,IDA IMP,IBA IEA,IBA,IBA,IBA IEA,IEP,IDA IMP IBA,IEA,IEA,IEA,IEA,IEA,IEA,IEA,IEA,IBA IEA,IEA,IEA,IEA,IEA,IEA,IEA,IBA IEA,IDA IGI,IEA,IMP IBA,IBA	ENSBTAG00000038042	FALSE	CXCR2
query_1	TRUE	0.00191442	1946	152	34	0.223684	0.0174717	GO:0009605	GO:BP	response to external stimulus	18832	3570	GO:0050896	IEA,IEA,IEA,IBA,ISS IBA IEA,IEA,IEA,IDA IMP,IBA IEA,IBA,IBA,IBA IEA,IEP,IDA IMP IBA,IEA,IEA,IEA,IEA,IEA,IEA,IEA,IEA,IBA IEA,IEA,IEA,IEA,IEA,IEA,IEA,IBA IEA,IDA IGI,IEA,IMP IBA,IBA	ENSBTAG00000021761	FALSE	BRAF
query_1	TRUE	0.00191442	1946	152	34	0.223684	0.0174717	GO:0009605	GO:BP	response to external stimulus	18832	3570	GO:0050896	IEA,IEA,IEA,IBA,ISS IBA IEA,IEA,IEA,IDA IMP,IBA IEA,IBA,IBA,IBA IEA,IEP,IDA IMP IBA,IEA,IEA,IEA,IEA,IEA,IEA,IEA,IEA,IBA IEA,IEA,IEA,IEA,IEA,IEA,IEA,IBA IEA,IDA IGI,IEA,IMP IBA,IBA	ENSBTAG00000000184	FALSE	EIF2AK3
query_1	TRUE	0.00191442	1946	152	34	0.223684	0.0174717	GO:0009605	GO:BP	response to external stimulus	18832	3570	GO:0050896	IEA,IEA,IEA,IBA,ISS IBA IEA,IEA,IEA,IDA IMP,IBA IEA,IBA,IBA,IBA IEA,IEP,IDA IMP IBA,IEA,IEA,IEA,IEA,IEA,IEA,IEA,IEA,IBA IEA,IEA,IEA,IEA,IEA,IEA,IEA,IBA IEA,IDA IGI,IEA,IMP IBA,IBA	ENSBTAG00000039839	FALSE	IL36RN
query_1	TRUE	0.00191442	1946	152	34	0.223684	0.0174717	GO:0009605	GO:BP	response to external stimulus	18832	3570	GO:0050896	IEA,IEA,IEA,IBA,ISS IBA IEA,IEA,IEA,IDA IMP,IBA IEA,IBA,IBA,IBA IEA,IEP,IDA IMP IBA,IEA,IEA,IEA,IEA,IEA,IEA,IEA,IEA,IBA IEA,IEA,IEA,IEA,IEA,IEA,IEA,IBA IEA,IDA IGI,IEA,IMP IBA,IBA	ENSBTAG00000018012	FALSE	IL1F10
query_1	TRUE	0.00622241	24	152	4	0.0263158	0.166667	GO:1903901	GO:BP	negative regulation of viral life cycle	18832	23973	GO:0019058, GO:0048525, GO:1903900	IMP,IEA,IBA,IBA IEA	ENSBTAG00000007532	TRUE	TRIM15
query_1	TRUE	0.00622241	24	152	4	0.0263158	0.166667	GO:1903901	GO:BP	negative regulation of viral life cycle	18832	23973	GO:0019058, GO:0048525, GO:1903900	IMP,IEA,IBA,IBA IEA	ENSBTAG00000007530	TRUE	TRIM10
query_1	TRUE	0.00622241	24	152	4	0.0263158	0.166667	GO:1903901	GO:BP	negative regulation of viral life cycle	18832	23973	GO:0019058, GO:0048525, GO:1903900	IMP,IEA,IBA,IBA IEA	ENSBTAG00000004490	TRUE	TRIM31
query_1	TRUE	0.00622241	24	152	4	0.0263158	0.166667	GO:1903901	GO:BP	negative regulation of viral life cycle	18832	23973	GO:0019058, GO:0048525, GO:1903900	IMP,IEA,IBA,IBA IEA	ENSBTAG00000035744	TRUE	TRIM26
query_1	TRUE	0.0158409	2840	152	41	0.269737	0.0144366	GO:0006950	GO:BP	response to stress	18832	2613	GO:0050896	IEA,IEA,IBA IEA,IBA IEA,IBA,ISS IBA IEA,IEA,IEA,IDA IMP,IBA IEA,IBA,IBA,IEA,IEA,IBA IEA,IDA IMP IBA,IEA,IEA,IEA,IEA,IEA,IEA,IEA,IEA,IMP,IDA,IBA,IEA,IEA,IEA,IEA,IEA,IEA,IDA IBA,IDA IMP IGI,ISS IEA,IEA,IEA,IMP IBA IEA,IBA IEA,IBA IEA	ENSBTAG00000003684	FALSE	LRFN5
query_1	TRUE	0.0158409	2840	152	41	0.269737	0.0144366	GO:0006950	GO:BP	response to stress	18832	2613	GO:0050896	IEA,IEA,IBA IEA,IBA IEA,IBA,ISS IBA IEA,IEA,IEA,IDA IMP,IBA IEA,IBA,IBA,IEA,IEA,IBA IEA,IDA IMP IBA,IEA,IEA,IEA,IEA,IEA,IEA,IEA,IEA,IMP,IDA,IBA,IEA,IEA,IEA,IEA,IEA,IEA,IDA IBA,IDA IMP IGI,ISS IEA,IEA,IEA,IMP IBA IEA,IBA IEA,IBA IEA	ENSBTAG00000011929	FALSE	USP50
query_1	TRUE	0.0158409	2840	152	41	0.269737	0.0144366	GO:0006950	GO:BP	response to stress	18832	2613	GO:0050896	IEA,IEA,IBA IEA,IBA IEA,IBA,ISS IBA IEA,IEA,IEA,IDA IMP,IBA IEA,IBA,IBA,IEA,IEA,IBA IEA,IDA IMP IBA,IEA,IEA,IEA,IEA,IEA,IEA,IEA,IEA,IMP,IDA,IBA,IEA,IEA,IEA,IEA,IEA,IEA,IDA IBA,IDA IMP IGI,ISS IEA,IEA,IEA,IMP IBA IEA,IBA IEA,IBA IEA	ENSBTAG00000027983	FALSE	GTF2H2
query_1	TRUE	0.0158409	2840	152	41	0.269737	0.0144366	GO:0006950	GO:BP	response to stress	18832	2613	GO:0050896	IEA,IEA,IBA IEA,IBA IEA,IBA,ISS IBA IEA,IEA,IEA,IDA IMP,IBA IEA,IBA,IBA,IEA,IEA,IBA IEA,IDA IMP IBA,IEA,IEA,IEA,IEA,IEA,IEA,IEA,IEA,IMP,IDA,IBA,IEA,IEA,IEA,IEA,IEA,IEA,IDA IBA,IDA IMP IGI,ISS IEA,IEA,IEA,IMP IBA IEA,IBA IEA,IBA IEA	ENSBTAG00000002073	FALSE	RAD17
query_1	TRUE	0.0158409	2840	152	41	0.269737	0.0144366	GO:0006950	GO:BP	response to stress	18832	2613	GO:0050896	IEA,IEA,IBA IEA,IBA IEA,IBA,ISS IBA IEA,IEA,IEA,IDA IMP,IBA IEA,IBA,IBA,IEA,IEA,IBA IEA,IDA IMP IBA,IEA,IEA,IEA,IEA,IEA,IEA,IEA,IEA,IMP,IDA,IBA,IEA,IEA,IEA,IEA,IEA,IEA,IDA IBA,IDA IMP IGI,ISS IEA,IEA,IEA,IMP IBA IEA,IBA IEA,IBA IEA	ENSBTAG00000003326	FALSE	NAIP
query_1	TRUE	0.0158409	2840	152	41	0.269737	0.0144366	GO:0006950	GO:BP	response to stress	18832	2613	GO:0050896	IEA,IEA,IBA IEA,IBA IEA,IBA,ISS IBA IEA,IEA,IEA,IDA IMP,IBA IEA,IBA,IBA,IEA,IEA,IBA IEA,IDA IMP IBA,IEA,IEA,IEA,IEA,IEA,IEA,IEA,IEA,IMP,IDA,IBA,IEA,IEA,IEA,IEA,IEA,IEA,IDA IBA,IDA IMP IGI,ISS IEA,IEA,IEA,IMP IBA IEA,IBA IEA,IBA IEA	ENSBTAG00000047486	FALSE	CARTPT
query_1	TRUE	0.0158409	2840	152	41	0.269737	0.0144366	GO:0006950	GO:BP	response to stress	18832	2613	GO:0050896	IEA,IEA,IBA IEA,IBA IEA,IBA,ISS IBA IEA,IEA,IEA,IDA IMP,IBA IEA,IBA,IBA,IEA,IEA,IBA IEA,IDA IMP IBA,IEA,IEA,IEA,IEA,IEA,IEA,IEA,IEA,IMP,IDA,IBA,IEA,IEA,IEA,IEA,IEA,IEA,IDA IBA,IDA IMP IGI,ISS IEA,IEA,IEA,IMP IBA IEA,IBA IEA,IBA IEA	ENSBTAG00000007173	FALSE	PDGFRA
query_1	TRUE	0.0158409	2840	152	41	0.269737	0.0144366	GO:0006950	GO:BP	response to stress	18832	2613	GO:0050896	IEA,IEA,IBA IEA,IBA IEA,IBA,ISS IBA IEA,IEA,IEA,IDA IMP,IBA IEA,IBA,IBA,IEA,IEA,IBA IEA,IDA IMP IBA,IEA,IEA,IEA,IEA,IEA,IEA,IEA,IEA,IMP,IDA,IBA,IEA,IEA,IEA,IEA,IEA,IEA,IDA IBA,IDA IMP IGI,ISS IEA,IEA,IEA,IMP IBA IEA,IBA IEA,IBA IEA	ENSBTAG00000002699	FALSE	KIT
query_1	TRUE	0.0158409	2840	152	41	0.269737	0.0144366	GO:0006950	GO:BP	response to stress	18832	2613	GO:0050896	IEA,IEA,IBA IEA,IBA IEA,IBA,ISS IBA IEA,IEA,IEA,IDA IMP,IBA IEA,IBA,IBA,IEA,IEA,IBA IEA,IDA IMP IBA,IEA,IEA,IEA,IEA,IEA,IEA,IEA,IEA,IMP,IDA,IBA,IEA,IEA,IEA,IEA,IEA,IEA,IDA IBA,IDA IMP IGI,ISS IEA,IEA,IEA,IMP IBA IEA,IBA IEA,IBA IEA	ENSBTAG00000007532	FALSE	TRIM15
query_1	TRUE	0.0158409	2840	152	41	0.269737	0.0144366	GO:0006950	GO:BP	response to stress	18832	2613	GO:0050896	IEA,IEA,IBA IEA,IBA IEA,IBA,ISS IBA IEA,IEA,IEA,IDA IMP,IBA IEA,IBA,IBA,IEA,IEA,IBA IEA,IDA IMP IBA,IEA,IEA,IEA,IEA,IEA,IEA,IEA,IEA,IMP,IDA,IBA,IEA,IEA,IEA,IEA,IEA,IEA,IDA IBA,IDA IMP IGI,ISS IEA,IEA,IEA,IMP IBA IEA,IBA IEA,IBA IEA	ENSBTAG00000007530	FALSE	TRIM10
query_1	TRUE	0.0158409	2840	152	41	0.269737	0.0144366	GO:0006950	GO:BP	response to stress	18832	2613	GO:0050896	IEA,IEA,IBA IEA,IBA IEA,IBA,ISS IBA IEA,IEA,IEA,IDA IMP,IBA IEA,IBA,IBA,IEA,IEA,IBA IEA,IDA IMP IBA,IEA,IEA,IEA,IEA,IEA,IEA,IEA,IEA,IMP,IDA,IBA,IEA,IEA,IEA,IEA,IEA,IEA,IDA IBA,IDA IMP IGI,ISS IEA,IEA,IEA,IMP IBA IEA,IBA IEA,IBA IEA	ENSBTAG00000037381	FALSE	TRIM40
query_1	TRUE	0.0158409	2840	152	41	0.269737	0.0144366	GO:0006950	GO:BP	response to stress	18832	2613	GO:0050896	IEA,IEA,IBA IEA,IBA IEA,IBA,ISS IBA IEA,IEA,IEA,IDA IMP,IBA IEA,IBA,IBA,IEA,IEA,IBA IEA,IDA IMP IBA,IEA,IEA,IEA,IEA,IEA,IEA,IEA,IEA,IMP,IDA,IBA,IEA,IEA,IEA,IEA,IEA,IEA,IDA IBA,IDA IMP IGI,ISS IEA,IEA,IEA,IMP IBA IEA,IBA IEA,IBA IEA	ENSBTAG00000004490	FALSE	TRIM31
query_1	TRUE	0.0158409	2840	152	41	0.269737	0.0144366	GO:0006950	GO:BP	response to stress	18832	2613	GO:0050896	IEA,IEA,IBA IEA,IBA IEA,IBA,ISS IBA IEA,IEA,IEA,IDA IMP,IBA IEA,IBA,IBA,IEA,IEA,IBA IEA,IDA IMP IBA,IEA,IEA,IEA,IEA,IEA,IEA,IEA,IEA,IMP,IDA,IBA,IEA,IEA,IEA,IEA,IEA,IEA,IDA IBA,IDA IMP IGI,ISS IEA,IEA,IEA,IMP IBA IEA,IBA IEA,IBA IEA	ENSBTAG00000025516	FALSE	GNL1
query_1	TRUE	0.0158409	2840	152	41	0.269737	0.0144366	GO:0006950	GO:BP	response to stress	18832	2613	GO:0050896	IEA,IEA,IBA IEA,IBA IEA,IBA,ISS IBA IEA,IEA,IEA,IDA IMP,IBA IEA,IBA,IBA,IEA,IEA,IBA IEA,IDA IMP IBA,IEA,IEA,IEA,IEA,IEA,IEA,IEA,IEA,IMP,IDA,IBA,IEA,IEA,IEA,IEA,IEA,IEA,IDA IBA,IDA IMP IGI,ISS IEA,IEA,IEA,IMP IBA IEA,IBA IEA,IBA IEA	ENSBTAG00000007643	FALSE	TRIM39
query_1	TRUE	0.0158409	2840	152	41	0.269737	0.0144366	GO:0006950	GO:BP	response to stress	18832	2613	GO:0050896	IEA,IEA,IBA IEA,IBA IEA,IBA,ISS IBA IEA,IEA,IEA,IDA IMP,IBA IEA,IBA,IBA,IEA,IEA,IBA IEA,IDA IMP IBA,IEA,IEA,IEA,IEA,IEA,IEA,IEA,IEA,IMP,IDA,IBA,IEA,IEA,IEA,IEA,IEA,IEA,IDA IBA,IDA IMP IGI,ISS IEA,IEA,IEA,IMP IBA IEA,IBA IEA,IBA IEA	ENSBTAG00000035744	FALSE	TRIM26
query_1	TRUE	0.0158409	2840	152	41	0.269737	0.0144366	GO:0006950	GO:BP	response to stress	18832	2613	GO:0050896	IEA,IEA,IBA IEA,IBA IEA,IBA,ISS IBA IEA,IEA,IEA,IDA IMP,IBA IEA,IBA,IBA,IEA,IEA,IBA IEA,IDA IMP IBA,IEA,IEA,IEA,IEA,IEA,IEA,IEA,IEA,IMP,IDA,IBA,IEA,IEA,IEA,IEA,IEA,IEA,IDA IBA,IDA IMP IGI,ISS IEA,IEA,IEA,IMP IBA IEA,IBA IEA,IBA IEA	ENSBTAG00000005400	FALSE	ATG5
query_1	TRUE	0.0158409	2840	152	41	0.269737	0.0144366	GO:0006950	GO:BP	response to stress	18832	2613	GO:0050896	IEA,IEA,IBA IEA,IBA IEA,IBA,ISS IBA IEA,IEA,IEA,IDA IMP,IBA IEA,IBA,IBA,IEA,IEA,IBA IEA,IDA IMP IBA,IEA,IEA,IEA,IEA,IEA,IEA,IEA,IEA,IMP,IDA,IBA,IEA,IEA,IEA,IEA,IEA,IEA,IDA IBA,IDA IMP IGI,ISS IEA,IEA,IEA,IMP IBA IEA,IBA IEA,IBA IEA	ENSBTAG00000003364	FALSE	DEFB119
query_1	TRUE	0.0158409	2840	152	41	0.269737	0.0144366	GO:0006950	GO:BP	response to stress	18832	2613	GO:0050896	IEA,IEA,IBA IEA,IBA IEA,IBA,ISS IBA IEA,IEA,IEA,IDA IMP,IBA IEA,IBA,IBA,IEA,IEA,IBA IEA,IDA IMP IBA,IEA,IEA,IEA,IEA,IEA,IEA,IEA,IEA,IMP,IDA,IBA,IEA,IEA,IEA,IEA,IEA,IEA,IDA IBA,IDA IMP IGI,ISS IEA,IEA,IEA,IMP IBA IEA,IBA IEA,IBA IEA	ENSBTAG00000052478	FALSE	DEFB116
query_1	TRUE	0.0158409	2840	152	41	0.269737	0.0144366	GO:0006950	GO:BP	response to stress	18832	2613	GO:0050896	IEA,IEA,IBA IEA,IBA IEA,IBA,ISS IBA IEA,IEA,IEA,IDA IMP,IBA IEA,IBA,IBA,IEA,IEA,IBA IEA,IDA IMP IBA,IEA,IEA,IEA,IEA,IEA,IEA,IEA,IEA,IMP,IDA,IBA,IEA,IEA,IEA,IEA,IEA,IEA,IDA IBA,IDA IMP IGI,ISS IEA,IEA,IEA,IMP IBA IEA,IBA IEA,IBA IEA	ENSBTAG00000048009	FALSE
query_1	TRUE	0.0158409	2840	152	41	0.269737	0.0144366	GO:0006950	GO:BP	response to stress	18832	2613	GO:0050896	IEA,IEA,IBA IEA,IBA IEA,IBA,ISS IBA IEA,IEA,IEA,IDA IMP,IBA IEA,IBA,IBA,IEA,IEA,IBA IEA,IDA IMP IBA,IEA,IEA,IEA,IEA,IEA,IEA,IEA,IEA,IMP,IDA,IBA,IEA,IEA,IEA,IEA,IEA,IEA,IDA IBA,IDA IMP IGI,ISS IEA,IEA,IEA,IMP IBA IEA,IBA IEA,IBA IEA	ENSBTAG00000048949	FALSE	DEFB121
query_1	TRUE	0.0158409	2840	152	41	0.269737	0.0144366	GO:0006950	GO:BP	response to stress	18832	2613	GO:0050896	IEA,IEA,IBA IEA,IBA IEA,IBA,ISS IBA IEA,IEA,IEA,IDA IMP,IBA IEA,IBA,IBA,IEA,IEA,IBA IEA,IDA IMP IBA,IEA,IEA,IEA,IEA,IEA,IEA,IEA,IEA,IMP,IDA,IBA,IEA,IEA,IEA,IEA,IEA,IEA,IDA IBA,IDA IMP IGI,ISS IEA,IEA,IEA,IMP IBA IEA,IBA IEA,IBA IEA	ENSBTAG00000027384	FALSE	DEFB122A
query_1	TRUE	0.0158409	2840	152	41	0.269737	0.0144366	GO:0006950	GO:BP	response to stress	18832	2613	GO:0050896	IEA,IEA,IBA IEA,IBA IEA,IBA,ISS IBA IEA,IEA,IEA,IDA IMP,IBA IEA,IBA,IBA,IEA,IEA,IBA IEA,IDA IMP IBA,IEA,IEA,IEA,IEA,IEA,IEA,IEA,IEA,IMP,IDA,IBA,IEA,IEA,IEA,IEA,IEA,IEA,IDA IBA,IDA IMP IGI,ISS IEA,IEA,IEA,IMP IBA IEA,IBA IEA,IBA IEA	ENSBTAG00000027383	FALSE	DEFB122
query_1	TRUE	0.0158409	2840	152	41	0.269737	0.0144366	GO:0006950	GO:BP	response to stress	18832	2613	GO:0050896	IEA,IEA,IBA IEA,IBA IEA,IBA,ISS IBA IEA,IEA,IEA,IDA IMP,IBA IEA,IBA,IBA,IEA,IEA,IBA IEA,IDA IMP IBA,IEA,IEA,IEA,IEA,IEA,IEA,IEA,IEA,IMP,IDA,IBA,IEA,IEA,IEA,IEA,IEA,IEA,IDA IBA,IDA IMP IGI,ISS IEA,IEA,IEA,IMP IBA IEA,IBA IEA,IBA IEA	ENSBTAG00000020555	FALSE	DEFB123
query_1	TRUE	0.0158409	2840	152	41	0.269737	0.0144366	GO:0006950	GO:BP	response to stress	18832	2613	GO:0050896	IEA,IEA,IBA IEA,IBA IEA,IBA,ISS IBA IEA,IEA,IEA,IDA IMP,IBA IEA,IBA,IBA,IEA,IEA,IBA IEA,IDA IMP IBA,IEA,IEA,IEA,IEA,IEA,IEA,IEA,IEA,IMP,IDA,IBA,IEA,IEA,IEA,IEA,IEA,IEA,IDA IBA,IDA IMP IGI,ISS IEA,IEA,IEA,IMP IBA IEA,IBA IEA,IBA IEA	ENSBTAG00000063404	FALSE	DEFB124
query_1	TRUE	0.0158409	2840	152	41	0.269737	0.0144366	GO:0006950	GO:BP	response to stress	18832	2613	GO:0050896	IEA,IEA,IBA IEA,IBA IEA,IBA,ISS IBA IEA,IEA,IEA,IDA IMP,IBA IEA,IBA,IBA,IEA,IEA,IBA IEA,IDA IMP IBA,IEA,IEA,IEA,IEA,IEA,IEA,IEA,IEA,IMP,IDA,IBA,IEA,IEA,IEA,IEA,IEA,IEA,IDA IBA,IDA IMP IGI,ISS IEA,IEA,IEA,IMP IBA IEA,IBA IEA,IBA IEA	ENSBTAG00000008840	FALSE	HM13
query_1	TRUE	0.0158409	2840	152	41	0.269737	0.0144366	GO:0006950	GO:BP	response to stress	18832	2613	GO:0050896	IEA,IEA,IBA IEA,IBA IEA,IBA,ISS IBA IEA,IEA,IEA,IDA IMP,IBA IEA,IBA,IBA,IEA,IEA,IBA IEA,IDA IMP IBA,IEA,IEA,IEA,IEA,IEA,IEA,IEA,IEA,IMP,IDA,IBA,IEA,IEA,IEA,IEA,IEA,IEA,IDA IBA,IDA IMP IGI,ISS IEA,IEA,IEA,IMP IBA IEA,IBA IEA,IBA IEA	ENSBTAG00000001015	FALSE	TM9SF4
query_1	TRUE	0.0158409	2840	152	41	0.269737	0.0144366	GO:0006950	GO:BP	response to stress	18832	2613	GO:0050896	IEA,IEA,IBA IEA,IBA IEA,IBA,ISS IBA IEA,IEA,IEA,IDA IMP,IBA IEA,IBA,IBA,IEA,IEA,IBA IEA,IDA IMP IBA,IEA,IEA,IEA,IEA,IEA,IEA,IEA,IEA,IMP,IDA,IBA,IEA,IEA,IEA,IEA,IEA,IEA,IDA IBA,IDA IMP IGI,ISS IEA,IEA,IEA,IMP IBA IEA,IBA IEA,IBA IEA	ENSBTAG00000006526	FALSE	BCL2L1
query_1	TRUE	0.0158409	2840	152	41	0.269737	0.0144366	GO:0006950	GO:BP	response to stress	18832	2613	GO:0050896	IEA,IEA,IBA IEA,IBA IEA,IBA,ISS IBA IEA,IEA,IEA,IDA IMP,IBA IEA,IBA,IBA,IEA,IEA,IBA IEA,IDA IMP IBA,IEA,IEA,IEA,IEA,IEA,IEA,IEA,IEA,IMP,IDA,IBA,IEA,IEA,IEA,IEA,IEA,IEA,IDA IBA,IDA IMP IGI,ISS IEA,IEA,IEA,IMP IBA IEA,IBA IEA,IBA IEA	ENSBTAG00000054958	FALSE	DEFB127
query_1	TRUE	0.0158409	2840	152	41	0.269737	0.0144366	GO:0006950	GO:BP	response to stress	18832	2613	GO:0050896	IEA,IEA,IBA IEA,IBA IEA,IBA,ISS IBA IEA,IEA,IEA,IDA IMP,IBA IEA,IBA,IBA,IEA,IEA,IBA IEA,IDA IMP IBA,IEA,IEA,IEA,IEA,IEA,IEA,IEA,IEA,IMP,IDA,IBA,IEA,IEA,IEA,IEA,IEA,IEA,IDA IBA,IDA IMP IGI,ISS IEA,IEA,IEA,IMP IBA IEA,IBA IEA,IBA IEA	ENSBTAG00000051033	FALSE
query_1	TRUE	0.0158409	2840	152	41	0.269737	0.0144366	GO:0006950	GO:BP	response to stress	18832	2613	GO:0050896	IEA,IEA,IBA IEA,IBA IEA,IBA,ISS IBA IEA,IEA,IEA,IDA IMP,IBA IEA,IBA,IBA,IEA,IEA,IBA IEA,IDA IMP IBA,IEA,IEA,IEA,IEA,IEA,IEA,IEA,IEA,IMP,IDA,IBA,IEA,IEA,IEA,IEA,IEA,IEA,IDA IBA,IDA IMP IGI,ISS IEA,IEA,IEA,IMP IBA IEA,IBA IEA,IBA IEA	ENSBTAG00000053093	FALSE
query_1	TRUE	0.0158409	2840	152	41	0.269737	0.0144366	GO:0006950	GO:BP	response to stress	18832	2613	GO:0050896	IEA,IEA,IBA IEA,IBA IEA,IBA,ISS IBA IEA,IEA,IEA,IDA IMP,IBA IEA,IBA,IBA,IEA,IEA,IBA IEA,IDA IMP IBA,IEA,IEA,IEA,IEA,IEA,IEA,IEA,IEA,IMP,IDA,IBA,IEA,IEA,IEA,IEA,IEA,IEA,IDA IBA,IDA IMP IGI,ISS IEA,IEA,IEA,IMP IBA IEA,IBA IEA,IBA IEA	ENSBTAG00000049328	FALSE
query_1	TRUE	0.0158409	2840	152	41	0.269737	0.0144366	GO:0006950	GO:BP	response to stress	18832	2613	GO:0050896	IEA,IEA,IBA IEA,IBA IEA,IBA,ISS IBA IEA,IEA,IEA,IDA IMP,IBA IEA,IBA,IBA,IEA,IEA,IBA IEA,IDA IMP IBA,IEA,IEA,IEA,IEA,IEA,IEA,IEA,IEA,IMP,IDA,IBA,IEA,IEA,IEA,IEA,IEA,IEA,IDA IBA,IDA IMP IGI,ISS IEA,IEA,IEA,IMP IBA IEA,IBA IEA,IBA IEA	ENSBTAG00000049491	FALSE	DEFB115
query_1	TRUE	0.0158409	2840	152	41	0.269737	0.0144366	GO:0006950	GO:BP	response to stress	18832	2613	GO:0050896	IEA,IEA,IBA IEA,IBA IEA,IBA,ISS IBA IEA,IEA,IEA,IDA IMP,IBA IEA,IBA,IBA,IEA,IEA,IBA IEA,IDA IMP IBA,IEA,IEA,IEA,IEA,IEA,IEA,IEA,IEA,IMP,IDA,IBA,IEA,IEA,IEA,IEA,IEA,IEA,IDA IBA,IDA IMP IGI,ISS IEA,IEA,IEA,IMP IBA IEA,IBA IEA,IBA IEA	ENSBTAG00000050556	FALSE
query_1	TRUE	0.0158409	2840	152	41	0.269737	0.0144366	GO:0006950	GO:BP	response to stress	18832	2613	GO:0050896	IEA,IEA,IBA IEA,IBA IEA,IBA,ISS IBA IEA,IEA,IEA,IDA IMP,IBA IEA,IBA,IBA,IEA,IEA,IBA IEA,IDA IMP IBA,IEA,IEA,IEA,IEA,IEA,IEA,IEA,IEA,IMP,IDA,IBA,IEA,IEA,IEA,IEA,IEA,IEA,IDA IBA,IDA IMP IGI,ISS IEA,IEA,IEA,IMP IBA IEA,IBA IEA,IBA IEA	ENSBTAG00000002112	FALSE	INSIG2
query_1	TRUE	0.0158409	2840	152	41	0.269737	0.0144366	GO:0006950	GO:BP	response to stress	18832	2613	GO:0050896	IEA,IEA,IBA IEA,IBA IEA,IBA,ISS IBA IEA,IEA,IEA,IDA IMP,IBA IEA,IBA,IBA,IEA,IEA,IBA IEA,IDA IMP IBA,IEA,IEA,IEA,IEA,IEA,IEA,IEA,IEA,IMP,IDA,IBA,IEA,IEA,IEA,IEA,IEA,IEA,IDA IBA,IDA IMP IGI,ISS IEA,IEA,IEA,IMP IBA IEA,IBA IEA,IBA IEA	ENSBTAG00000021761	FALSE	BRAF
query_1	TRUE	0.0158409	2840	152	41	0.269737	0.0144366	GO:0006950	GO:BP	response to stress	18832	2613	GO:0050896	IEA,IEA,IBA IEA,IBA IEA,IBA,ISS IBA IEA,IEA,IEA,IDA IMP,IBA IEA,IBA,IBA,IEA,IEA,IBA IEA,IDA IMP IBA,IEA,IEA,IEA,IEA,IEA,IEA,IEA,IEA,IMP,IDA,IBA,IEA,IEA,IEA,IEA,IEA,IEA,IDA IBA,IDA IMP IGI,ISS IEA,IEA,IEA,IMP IBA IEA,IBA IEA,IBA IEA	ENSBTAG00000000184	FALSE	EIF2AK3
query_1	TRUE	0.0158409	2840	152	41	0.269737	0.0144366	GO:0006950	GO:BP	response to stress	18832	2613	GO:0050896	IEA,IEA,IBA IEA,IBA IEA,IBA,ISS IBA IEA,IEA,IEA,IDA IMP,IBA IEA,IBA,IBA,IEA,IEA,IBA IEA,IDA IMP IBA,IEA,IEA,IEA,IEA,IEA,IEA,IEA,IEA,IMP,IDA,IBA,IEA,IEA,IEA,IEA,IEA,IEA,IDA IBA,IDA IMP IGI,ISS IEA,IEA,IEA,IMP IBA IEA,IBA IEA,IBA IEA	ENSBTAG00000060313	FALSE	IL36A
query_1	TRUE	0.0158409	2840	152	41	0.269737	0.0144366	GO:0006950	GO:BP	response to stress	18832	2613	GO:0050896	IEA,IEA,IBA IEA,IBA IEA,IBA,ISS IBA IEA,IEA,IEA,IDA IMP,IBA IEA,IBA,IBA,IEA,IEA,IBA IEA,IDA IMP IBA,IEA,IEA,IEA,IEA,IEA,IEA,IEA,IEA,IMP,IDA,IBA,IEA,IEA,IEA,IEA,IEA,IEA,IDA IBA,IDA IMP IGI,ISS IEA,IEA,IEA,IMP IBA IEA,IBA IEA,IBA IEA	ENSBTAG00000059479	FALSE
query_1	TRUE	0.0158409	2840	152	41	0.269737	0.0144366	GO:0006950	GO:BP	response to stress	18832	2613	GO:0050896	IEA,IEA,IBA IEA,IBA IEA,IBA,ISS IBA IEA,IEA,IEA,IDA IMP,IBA IEA,IBA,IBA,IEA,IEA,IBA IEA,IDA IMP IBA,IEA,IEA,IEA,IEA,IEA,IEA,IEA,IEA,IMP,IDA,IBA,IEA,IEA,IEA,IEA,IEA,IEA,IDA IBA,IDA IMP IGI,ISS IEA,IEA,IEA,IMP IBA IEA,IBA IEA,IBA IEA	ENSBTAG00000039839	FALSE	IL36RN
query_1	TRUE	0.0158409	2840	152	41	0.269737	0.0144366	GO:0006950	GO:BP	response to stress	18832	2613	GO:0050896	IEA,IEA,IBA IEA,IBA IEA,IBA,ISS IBA IEA,IEA,IEA,IDA IMP,IBA IEA,IBA,IBA,IEA,IEA,IBA IEA,IDA IMP IBA,IEA,IEA,IEA,IEA,IEA,IEA,IEA,IEA,IMP,IDA,IBA,IEA,IEA,IEA,IEA,IEA,IEA,IDA IBA,IDA IMP IGI,ISS IEA,IEA,IEA,IMP IBA IEA,IBA IEA,IBA IEA	ENSBTAG00000018012	FALSE	IL1F10
query_1	TRUE	0.0158409	2840	152	41	0.269737	0.0144366	GO:0006950	GO:BP	response to stress	18832	2613	GO:0050896	IEA,IEA,IBA IEA,IBA IEA,IBA,ISS IBA IEA,IEA,IEA,IDA IMP,IBA IEA,IBA,IBA,IEA,IEA,IBA IEA,IDA IMP IBA,IEA,IEA,IEA,IEA,IEA,IEA,IEA,IEA,IMP,IDA,IBA,IEA,IEA,IEA,IEA,IEA,IEA,IDA IBA,IDA IMP IGI,ISS IEA,IEA,IEA,IMP IBA IEA,IBA IEA,IBA IEA	ENSBTAG00000019665	FALSE	IL1RN
query_1	TRUE	0.00554718	8	154	3	0.0194805	0.375	GO:0098553	GO:CC	lumenal side of endoplasmic reticulum membrane	19649	3189	GO:0005789, GO:0098576	IEA,IEA,IDA	ENSBTAG00000011831	TRUE	SPPL2A
query_1	TRUE	0.00554718	8	154	3	0.0194805	0.375	GO:0098553	GO:CC	lumenal side of endoplasmic reticulum membrane	19649	3189	GO:0005789, GO:0098576	IEA,IEA,IDA	ENSBTAG00000002069	TRUE
query_1	TRUE	0.00554718	8	154	3	0.0194805	0.375	GO:0098553	GO:CC	lumenal side of endoplasmic reticulum membrane	19649	3189	GO:0005789, GO:0098576	IEA,IEA,IDA	ENSBTAG00000008840	TRUE	HM13
query_1	TRUE	0.00554718	1745	154	30	0.194805	0.017192	GO:0005576	GO:CC	extracellular region	19649	198	GO:0110165	ISS IBA IEA,IEA,IBA,IBA,IBA IEA,IEA,IEA,IEA,IEA,IEA,IEA,IEA,IEA,IEA,IEA,IEA,IEA,IEA,IEA,IEA,IBA,IBA,IBA,IBA,IEA,IEA,IBA IEA,IBA IEA,IBA IEA,IBA	ENSBTAG00000047486	TRUE	CARTPT
query_1	TRUE	0.00554718	1745	154	30	0.194805	0.017192	GO:0005576	GO:CC	extracellular region	19649	198	GO:0110165	ISS IBA IEA,IEA,IBA,IBA,IBA IEA,IEA,IEA,IEA,IEA,IEA,IEA,IEA,IEA,IEA,IEA,IEA,IEA,IEA,IEA,IEA,IBA,IBA,IBA,IBA,IEA,IEA,IBA IEA,IBA IEA,IBA IEA,IBA	ENSBTAG00000002699	TRUE	KIT
query_1	TRUE	0.00554718	1745	154	30	0.194805	0.017192	GO:0005576	GO:CC	extracellular region	19649	198	GO:0110165	ISS IBA IEA,IEA,IBA,IBA,IBA IEA,IEA,IEA,IEA,IEA,IEA,IEA,IEA,IEA,IEA,IEA,IEA,IEA,IEA,IEA,IEA,IBA,IBA,IBA,IBA,IEA,IEA,IBA IEA,IBA IEA,IBA IEA,IBA	ENSBTAG00000038619	TRUE
query_1	TRUE	0.00554718	1745	154	30	0.194805	0.017192	GO:0005576	GO:CC	extracellular region	19649	198	GO:0110165	ISS IBA IEA,IEA,IBA,IBA,IBA IEA,IEA,IEA,IEA,IEA,IEA,IEA,IEA,IEA,IEA,IEA,IEA,IEA,IEA,IEA,IEA,IBA,IBA,IBA,IBA,IEA,IEA,IBA IEA,IBA IEA,IBA IEA,IBA	ENSBTAG00000002069	TRUE
query_1	TRUE	0.00554718	1745	154	30	0.194805	0.017192	GO:0005576	GO:CC	extracellular region	19649	198	GO:0110165	ISS IBA IEA,IEA,IBA,IBA,IBA IEA,IEA,IEA,IEA,IEA,IEA,IEA,IEA,IEA,IEA,IEA,IEA,IEA,IEA,IEA,IEA,IBA,IBA,IBA,IBA,IEA,IEA,IBA IEA,IBA IEA,IBA IEA,IBA	ENSBTAG00000021587	TRUE	SMPDL3A
query_1	TRUE	0.00554718	1745	154	30	0.194805	0.017192	GO:0005576	GO:CC	extracellular region	19649	198	GO:0110165	ISS IBA IEA,IEA,IBA,IBA,IBA IEA,IEA,IEA,IEA,IEA,IEA,IEA,IEA,IEA,IEA,IEA,IEA,IEA,IEA,IEA,IEA,IBA,IBA,IBA,IBA,IEA,IEA,IBA IEA,IBA IEA,IBA IEA,IBA	ENSBTAG00000003364	TRUE	DEFB119
query_1	TRUE	0.00554718	1745	154	30	0.194805	0.017192	GO:0005576	GO:CC	extracellular region	19649	198	GO:0110165	ISS IBA IEA,IEA,IBA,IBA,IBA IEA,IEA,IEA,IEA,IEA,IEA,IEA,IEA,IEA,IEA,IEA,IEA,IEA,IEA,IEA,IEA,IBA,IBA,IBA,IBA,IEA,IEA,IBA IEA,IBA IEA,IBA IEA,IBA	ENSBTAG00000052478	TRUE	DEFB116
query_1	TRUE	0.00554718	1745	154	30	0.194805	0.017192	GO:0005576	GO:CC	extracellular region	19649	198	GO:0110165	ISS IBA IEA,IEA,IBA,IBA,IBA IEA,IEA,IEA,IEA,IEA,IEA,IEA,IEA,IEA,IEA,IEA,IEA,IEA,IEA,IEA,IEA,IBA,IBA,IBA,IBA,IEA,IEA,IBA IEA,IBA IEA,IBA IEA,IBA	ENSBTAG00000048009	TRUE
query_1	TRUE	0.00554718	1745	154	30	0.194805	0.017192	GO:0005576	GO:CC	extracellular region	19649	198	GO:0110165	ISS IBA IEA,IEA,IBA,IBA,IBA IEA,IEA,IEA,IEA,IEA,IEA,IEA,IEA,IEA,IEA,IEA,IEA,IEA,IEA,IEA,IEA,IBA,IBA,IBA,IBA,IEA,IEA,IBA IEA,IBA IEA,IBA IEA,IBA	ENSBTAG00000048949	TRUE	DEFB121
query_1	TRUE	0.00554718	1745	154	30	0.194805	0.017192	GO:0005576	GO:CC	extracellular region	19649	198	GO:0110165	ISS IBA IEA,IEA,IBA,IBA,IBA IEA,IEA,IEA,IEA,IEA,IEA,IEA,IEA,IEA,IEA,IEA,IEA,IEA,IEA,IEA,IEA,IBA,IBA,IBA,IBA,IEA,IEA,IBA IEA,IBA IEA,IBA IEA,IBA	ENSBTAG00000027384	TRUE	DEFB122A
query_1	TRUE	0.00554718	1745	154	30	0.194805	0.017192	GO:0005576	GO:CC	extracellular region	19649	198	GO:0110165	ISS IBA IEA,IEA,IBA,IBA,IBA IEA,IEA,IEA,IEA,IEA,IEA,IEA,IEA,IEA,IEA,IEA,IEA,IEA,IEA,IEA,IEA,IBA,IBA,IBA,IBA,IEA,IEA,IBA IEA,IBA IEA,IBA IEA,IBA	ENSBTAG00000027383	TRUE	DEFB122
query_1	TRUE	0.00554718	1745	154	30	0.194805	0.017192	GO:0005576	GO:CC	extracellular region	19649	198	GO:0110165	ISS IBA IEA,IEA,IBA,IBA,IBA IEA,IEA,IEA,IEA,IEA,IEA,IEA,IEA,IEA,IEA,IEA,IEA,IEA,IEA,IEA,IEA,IBA,IBA,IBA,IBA,IEA,IEA,IBA IEA,IBA IEA,IBA IEA,IBA	ENSBTAG00000020555	TRUE	DEFB123
query_1	TRUE	0.00554718	1745	154	30	0.194805	0.017192	GO:0005576	GO:CC	extracellular region	19649	198	GO:0110165	ISS IBA IEA,IEA,IBA,IBA,IBA IEA,IEA,IEA,IEA,IEA,IEA,IEA,IEA,IEA,IEA,IEA,IEA,IEA,IEA,IEA,IEA,IBA,IBA,IBA,IBA,IEA,IEA,IBA IEA,IBA IEA,IBA IEA,IBA	ENSBTAG00000063404	TRUE	DEFB124
query_1	TRUE	0.00554718	1745	154	30	0.194805	0.017192	GO:0005576	GO:CC	extracellular region	19649	198	GO:0110165	ISS IBA IEA,IEA,IBA,IBA,IBA IEA,IEA,IEA,IEA,IEA,IEA,IEA,IEA,IEA,IEA,IEA,IEA,IEA,IEA,IEA,IEA,IBA,IBA,IBA,IBA,IEA,IEA,IBA IEA,IBA IEA,IBA IEA,IBA	ENSBTAG00000054958	TRUE	DEFB127
query_1	TRUE	0.00554718	1745	154	30	0.194805	0.017192	GO:0005576	GO:CC	extracellular region	19649	198	GO:0110165	ISS IBA IEA,IEA,IBA,IBA,IBA IEA,IEA,IEA,IEA,IEA,IEA,IEA,IEA,IEA,IEA,IEA,IEA,IEA,IEA,IEA,IEA,IBA,IBA,IBA,IBA,IEA,IEA,IBA IEA,IBA IEA,IBA IEA,IBA	ENSBTAG00000051033	TRUE
query_1	TRUE	0.00554718	1745	154	30	0.194805	0.017192	GO:0005576	GO:CC	extracellular region	19649	198	GO:0110165	ISS IBA IEA,IEA,IBA,IBA,IBA IEA,IEA,IEA,IEA,IEA,IEA,IEA,IEA,IEA,IEA,IEA,IEA,IEA,IEA,IEA,IEA,IBA,IBA,IBA,IBA,IEA,IEA,IBA IEA,IBA IEA,IBA IEA,IBA	ENSBTAG00000053093	TRUE
query_1	TRUE	0.00554718	1745	154	30	0.194805	0.017192	GO:0005576	GO:CC	extracellular region	19649	198	GO:0110165	ISS IBA IEA,IEA,IBA,IBA,IBA IEA,IEA,IEA,IEA,IEA,IEA,IEA,IEA,IEA,IEA,IEA,IEA,IEA,IEA,IEA,IEA,IBA,IBA,IBA,IBA,IEA,IEA,IBA IEA,IBA IEA,IBA IEA,IBA	ENSBTAG00000049328	TRUE
query_1	TRUE	0.00554718	1745	154	30	0.194805	0.017192	GO:0005576	GO:CC	extracellular region	19649	198	GO:0110165	ISS IBA IEA,IEA,IBA,IBA,IBA IEA,IEA,IEA,IEA,IEA,IEA,IEA,IEA,IEA,IEA,IEA,IEA,IEA,IEA,IEA,IEA,IBA,IBA,IBA,IBA,IEA,IEA,IBA IEA,IBA IEA,IBA IEA,IBA	ENSBTAG00000049491	TRUE	DEFB115
query_1	TRUE	0.00554718	1745	154	30	0.194805	0.017192	GO:0005576	GO:CC	extracellular region	19649	198	GO:0110165	ISS IBA IEA,IEA,IBA,IBA,IBA IEA,IEA,IEA,IEA,IEA,IEA,IEA,IEA,IEA,IEA,IEA,IEA,IEA,IEA,IEA,IEA,IBA,IBA,IBA,IBA,IEA,IEA,IBA IEA,IBA IEA,IBA IEA,IBA	ENSBTAG00000050556	TRUE
query_1	TRUE	0.00554718	1745	154	30	0.194805	0.017192	GO:0005576	GO:CC	extracellular region	19649	198	GO:0110165	ISS IBA IEA,IEA,IBA,IBA,IBA IEA,IEA,IEA,IEA,IEA,IEA,IEA,IEA,IEA,IEA,IEA,IEA,IEA,IEA,IEA,IEA,IBA,IBA,IBA,IBA,IEA,IEA,IBA IEA,IBA IEA,IBA IEA,IBA	ENSBTAG00000003771	TRUE	C1QL2
query_1	TRUE	0.00554718	1745	154	30	0.194805	0.017192	GO:0005576	GO:CC	extracellular region	19649	198	GO:0110165	ISS IBA IEA,IEA,IBA,IBA,IBA IEA,IEA,IEA,IEA,IEA,IEA,IEA,IEA,IEA,IEA,IEA,IEA,IEA,IEA,IEA,IEA,IBA,IBA,IBA,IBA,IEA,IEA,IBA IEA,IBA IEA,IBA IEA,IBA	ENSBTAG00000047185	TRUE
query_1	TRUE	0.00554718	1745	154	30	0.194805	0.017192	GO:0005576	GO:CC	extracellular region	19649	198	GO:0110165	ISS IBA IEA,IEA,IBA,IBA,IBA IEA,IEA,IEA,IEA,IEA,IEA,IEA,IEA,IEA,IEA,IEA,IEA,IEA,IEA,IEA,IEA,IBA,IBA,IBA,IBA,IEA,IEA,IBA IEA,IBA IEA,IBA IEA,IBA	ENSBTAG00000050329	TRUE
query_1	TRUE	0.00554718	1745	154	30	0.194805	0.017192	GO:0005576	GO:CC	extracellular region	19649	198	GO:0110165	ISS IBA IEA,IEA,IBA,IBA,IBA IEA,IEA,IEA,IEA,IEA,IEA,IEA,IEA,IEA,IEA,IEA,IEA,IEA,IEA,IEA,IEA,IBA,IBA,IBA,IBA,IEA,IEA,IBA IEA,IBA IEA,IBA IEA,IBA	ENSBTAG00000051611	TRUE
query_1	TRUE	0.00554718	1745	154	30	0.194805	0.017192	GO:0005576	GO:CC	extracellular region	19649	198	GO:0110165	ISS IBA IEA,IEA,IBA,IBA,IBA IEA,IEA,IEA,IEA,IEA,IEA,IEA,IEA,IEA,IEA,IEA,IEA,IEA,IEA,IEA,IEA,IBA,IBA,IBA,IBA,IEA,IEA,IBA IEA,IBA IEA,IBA IEA,IBA	ENSBTAG00000051342	TRUE
query_1	TRUE	0.00554718	1745	154	30	0.194805	0.017192	GO:0005576	GO:CC	extracellular region	19649	198	GO:0110165	ISS IBA IEA,IEA,IBA,IBA,IBA IEA,IEA,IEA,IEA,IEA,IEA,IEA,IEA,IEA,IEA,IEA,IEA,IEA,IEA,IEA,IEA,IBA,IBA,IBA,IBA,IEA,IEA,IBA IEA,IBA IEA,IBA IEA,IBA	ENSBTAG00000060313	TRUE	IL36A
query_1	TRUE	0.00554718	1745	154	30	0.194805	0.017192	GO:0005576	GO:CC	extracellular region	19649	198	GO:0110165	ISS IBA IEA,IEA,IBA,IBA,IBA IEA,IEA,IEA,IEA,IEA,IEA,IEA,IEA,IEA,IEA,IEA,IEA,IEA,IEA,IEA,IEA,IBA,IBA,IBA,IBA,IEA,IEA,IBA IEA,IBA IEA,IBA IEA,IBA	ENSBTAG00000059479	TRUE
query_1	TRUE	0.00554718	1745	154	30	0.194805	0.017192	GO:0005576	GO:CC	extracellular region	19649	198	GO:0110165	ISS IBA IEA,IEA,IBA,IBA,IBA IEA,IEA,IEA,IEA,IEA,IEA,IEA,IEA,IEA,IEA,IEA,IEA,IEA,IEA,IEA,IEA,IBA,IBA,IBA,IBA,IEA,IEA,IBA IEA,IBA IEA,IBA IEA,IBA	ENSBTAG00000039839	TRUE	IL36RN
query_1	TRUE	0.00554718	1745	154	30	0.194805	0.017192	GO:0005576	GO:CC	extracellular region	19649	198	GO:0110165	ISS IBA IEA,IEA,IBA,IBA,IBA IEA,IEA,IEA,IEA,IEA,IEA,IEA,IEA,IEA,IEA,IEA,IEA,IEA,IEA,IEA,IEA,IBA,IBA,IBA,IBA,IEA,IEA,IBA IEA,IBA IEA,IBA IEA,IBA	ENSBTAG00000018012	TRUE	IL1F10
query_1	TRUE	0.00554718	1745	154	30	0.194805	0.017192	GO:0005576	GO:CC	extracellular region	19649	198	GO:0110165	ISS IBA IEA,IEA,IBA,IBA,IBA IEA,IEA,IEA,IEA,IEA,IEA,IEA,IEA,IEA,IEA,IEA,IEA,IEA,IEA,IEA,IEA,IBA,IBA,IBA,IBA,IEA,IEA,IBA IEA,IBA IEA,IBA IEA,IBA	ENSBTAG00000019665	TRUE	IL1RN
query_1	TRUE	0.00554718	1745	154	30	0.194805	0.017192	GO:0005576	GO:CC	extracellular region	19649	198	GO:0110165	ISS IBA IEA,IEA,IBA,IBA,IBA IEA,IEA,IEA,IEA,IEA,IEA,IEA,IEA,IEA,IEA,IEA,IEA,IEA,IEA,IEA,IEA,IBA,IBA,IBA,IBA,IEA,IEA,IBA IEA,IBA IEA,IBA IEA,IBA	ENSBTAG00000003408	TRUE
query_1	TRUE	0.0231204	15	154	3	0.0194805	0.2	GO:0098576	GO:CC	lumenal side of membrane	19649	3210	GO:0031090, GO:0098552	IEA,IEA,IDA	ENSBTAG00000011831	FALSE	SPPL2A
query_1	TRUE	0.0231204	15	154	3	0.0194805	0.2	GO:0098576	GO:CC	lumenal side of membrane	19649	3210	GO:0031090, GO:0098552	IEA,IEA,IDA	ENSBTAG00000002069	FALSE
query_1	TRUE	0.0231204	15	154	3	0.0194805	0.2	GO:0098576	GO:CC	lumenal side of membrane	19649	3210	GO:0031090, GO:0098552	IEA,IEA,IDA	ENSBTAG00000008840	FALSE	HM13
query_1	TRUE	5.93953e-06	12	128	5	0.0390625	0.416667	GO:0005149	GO:MF	interleukin-1 receptor binding	17732	1316	GO:0005126, GO:0070851	IEA,IEA,IEA,IEA,IEA	ENSBTAG00000060313	TRUE	IL36A
query_1	TRUE	5.93953e-06	12	128	5	0.0390625	0.416667	GO:0005149	GO:MF	interleukin-1 receptor binding	17732	1316	GO:0005126, GO:0070851	IEA,IEA,IEA,IEA,IEA	ENSBTAG00000059479	TRUE
query_1	TRUE	5.93953e-06	12	128	5	0.0390625	0.416667	GO:0005149	GO:MF	interleukin-1 receptor binding	17732	1316	GO:0005126, GO:0070851	IEA,IEA,IEA,IEA,IEA	ENSBTAG00000039839	TRUE	IL36RN
query_1	TRUE	5.93953e-06	12	128	5	0.0390625	0.416667	GO:0005149	GO:MF	interleukin-1 receptor binding	17732	1316	GO:0005126, GO:0070851	IEA,IEA,IEA,IEA,IEA	ENSBTAG00000018012	TRUE	IL1F10
query_1	TRUE	5.93953e-06	12	128	5	0.0390625	0.416667	GO:0005149	GO:MF	interleukin-1 receptor binding	17732	1316	GO:0005126, GO:0070851	IEA,IEA,IEA,IEA,IEA	ENSBTAG00000019665	TRUE	IL1RN
query_1	TRUE	0.0347131	112	128	6	0.046875	0.0535714	GO:0070851	GO:MF	growth factor receptor binding	17732	8729	GO:0005102	IEA,IEA,IEA,IEA,IEA,IEA	ENSBTAG00000007173	FALSE	PDGFRA
query_1	TRUE	0.0347131	112	128	6	0.046875	0.0535714	GO:0070851	GO:MF	growth factor receptor binding	17732	8729	GO:0005102	IEA,IEA,IEA,IEA,IEA,IEA	ENSBTAG00000060313	FALSE	IL36A
query_1	TRUE	0.0347131	112	128	6	0.046875	0.0535714	GO:0070851	GO:MF	growth factor receptor binding	17732	8729	GO:0005102	IEA,IEA,IEA,IEA,IEA,IEA	ENSBTAG00000059479	FALSE
query_1	TRUE	0.0347131	112	128	6	0.046875	0.0535714	GO:0070851	GO:MF	growth factor receptor binding	17732	8729	GO:0005102	IEA,IEA,IEA,IEA,IEA,IEA	ENSBTAG00000039839	FALSE	IL36RN
query_1	TRUE	0.0347131	112	128	6	0.046875	0.0535714	GO:0070851	GO:MF	growth factor receptor binding	17732	8729	GO:0005102	IEA,IEA,IEA,IEA,IEA,IEA	ENSBTAG00000018012	FALSE	IL1F10
query_1	TRUE	0.0347131	112	128	6	0.046875	0.0535714	GO:0070851	GO:MF	growth factor receptor binding	17732	8729	GO:0005102	IEA,IEA,IEA,IEA,IEA,IEA	ENSBTAG00000019665	FALSE	IL1RN
